# Supplementary material for: Does occupational distress raise the risk of alcohol use, binge-eating, ill health and sleep problems among medical doctors? A UK cross-sectional study
Source: PubMed Central journal article supplement — BMJ Open. 2019 May 15;9(5):e027362. doi: 10.1136/bmjopen-2018-027362 (PMC6530309; doi:10.1136/bmjopen-2018-027362), 2019-05-15
Supplement: bmjopen-2018-027362.draft_revisions.pdf [file bmjopen-2018-027362.draft_revisions.pdf]

# BMJ Open

BMJ Open is committed to open peer review. As part of this commitment we make the peer review history of every article we publish publicly available.

When an article is published we post the peer reviewers' comments and the authors' responses online. We also post the versions of the paper that were used during peer review. These are the versions that the peer review comments apply to.

The versions of the paper that follow are the versions that were submitted during the peer review process. They are not the versions of record or the final published versions. They should not be cited or distributed as the published version of this manuscript.

BMJ Open is an open access journal and the full, final, typeset and author-corrected version of record of the manuscript is available on our site with no access controls, subscription charges or pay-per-view fees (<http://bmjopen.bmj.com>).

If you have any questions on BMJ Open's open peer review process please email [info.bmjopen@bmj.com](mailto:info.bmjopen@bmj.com)

# BMJ Open

## Occupational distress raises the risk of alcohol use, binge-eating, sleep problems and ill health: cross-sectional study of UK medical doctors

|                               |                                                                                                                                                                                |
|-------------------------------|--------------------------------------------------------------------------------------------------------------------------------------------------------------------------------|
| Journal:                      | <i>BMJ Open</i>                                                                                                                                                                |
| Manuscript ID                 | bmjopen-2018-027362                                                                                                                                                            |
| Article Type:                 | Research                                                                                                                                                                       |
| Date Submitted by the Author: | 18-Oct-2018                                                                                                                                                                    |
| Complete List of Authors:     | Medisauskaite, Asta; UCL, Research Department of Medical Education<br>Kamau, Caroline; Birkbeck, University of London, Department of Organizational Psychology                 |
| Keywords:                     | Health & safety < HEALTH SERVICES ADMINISTRATION & MANAGEMENT, MENTAL HEALTH, OCCUPATIONAL & INDUSTRIAL MEDICINE, Substance misuse < PSYCHIATRY, Eating disorders < PSYCHIATRY |
|                               |                                                                                                                                                                                |

SCHOLARONE™  
Manuscripts

1  
2  
3 **Occupational distress raises the risk of alcohol use, binge-eating, sleep problems and ill**  
4  
5 **health: cross-sectional study of UK medical doctors**  
6  
7  
8  
9

10 Asta Medisauskaite, PhD<sup>1</sup> & Caroline Kamau, PhD<sup>2</sup>  
11

12 <sup>1</sup> Research Department of Medical Education, UCL Medical School Room, GF/644, Royal Free  
13 Hospital, NW3 2PF.  
14

15 <sup>2</sup> Birkbeck Centre for Medical Humanities, Birkbeck, University of London, Malet Street,  
16 London, WC1E 7HX.  
17  
18  
19  
20  
21  
22

23 *Corresponding author:* Asta Medisauskaite, Research Department of Medical Education, UCL  
24 Medical School Room GF/644, Royal Free Hospital, NW3 2PF. E-mail address:  
25 [a.medisauskaite@ucl.ac.uk](mailto:a.medisauskaite@ucl.ac.uk). Telephone number: +44 2031086654  
26  
27  
28  
29  
30  
31  
32  
33  
34  
35  
36  
37  
38  
39  
40  
41  
42  
43  
44  
45  
46  
47  
48  
49  
50  
51  
52  
53  
54  
55  
56  
57  
58  
59  
60

## Abstract

**Objectives.** This study aims to assess the prevalence of health problems (e.g. sleep problems, binge-eating, substance use, and ill health) among UK doctors and to investigate whether doctors suffering from occupational distress have an increased risk of these health problems.

**Design.** This study reports the analysis of data collected at the baseline stage of a randomised controlled trial (protocol #NCT02838290).

**Setting.** Doctors were invited from medical Royal Colleges, the British Medical Association's research panel members, and a random selection of NHS trusts across various UK regions.

**Participants:** 417 UK doctors with an equivalent split of gender (48% males) and seniority (49% consultants).

**Main Outcomes and Measures:** Outcomes were sleep problems (e.g. insomnia), substance use (e.g. binge-drinking), ill health (e.g. backache) and binge-eating (e.g. uncontrollable eating).

Predictor variables were occupational distress (psychiatric morbidity, burnout, job effort, work-life imbalance, coping with stress through self-blame or substances) and work factors (working in a hospital and years practicing medicine).

**Results:** 44% of doctors binge-drank and 5% met the criteria for alcohol dependence; 24-29% experienced negative emotions after overeating and 8% had a binge-eating disorder; 20-61% had some type of sleep problems and 12% had severe/moderate insomnia; 69% had fatigue and 19-29% experienced other types of ill health problems. The results show that occupational distress and job factors increases the odds of doctors using substances, having sleep problems, frequent symptoms of ill health, and binge-eating. For example, burnout increased the risk of all types of sleep problems, e.g. difficulty falling/staying asleep, insomnia (OR $\geq$ 1.344;  $p \leq 0.036$ ).

1  
2  
3 **Conclusion.** Early recognition of occupational distress can prevent health problems, such as  
4  
5 insomnia, binge-eating, substance use, ill health symptoms, among UK doctors. Even taking into  
6  
7 consideration whether or not a doctor works in a hospital, the risk of health problems still rises  
8  
9  
10 when doctors have signs of occupational distress.  
11  
12

### 13 **Strengths and limitations of this study**

- 14  
15  
16  
17  
18 • This is the first study exploring a wide range of health problems among UK doctors and  
19  
20 examining work-related risk factors;  
21  
22
- 23 • The study was piloted - doctors were consulted before the study started;  
24
- 25 • This is a cross-sectional study and therefore it is not possible to conclude on causation;  
26  
27
- 28 • It was not possible to calculate the response rate as it was not clear if all trusts and royal  
29  
30 colleges who agreed to take part in this study actually distributed the invitation and to  
31  
32 how many doctors.  
33  
34  
35  
36  
37  
38  
39  
40  
41  
42  
43  
44  
45  
46  
47  
48  
49  
50  
51  
52  
53  
54  
55  
56  
57  
58  
59  
60

## Introduction

Doctors experience higher levels of occupational distress than the general population [1] but little is known about the impact on the health of doctors. Little is known about whether occupational distress raises the risk of doctors using alcohol or drugs, as has been observed in the general population,[2] or presenting with symptoms of ill health such as daily or frequent headaches, backache, or insomnia. This study contributes new evidence to the literature by evaluating the health consequences of occupational distress for doctors. Occupational distress may be described as a syndrome comprising of burnout, job effort-reward imbalance, work-life imbalance, stress, depression, psychiatric morbidity, maladaptive coping strategies and other symptoms.[3,4] Although doctors are generally healthier than the general population,[5] they suffer higher levels of occupational distress than the average worker in the general population [1] making it useful to investigate the impact of different types of occupational distress on the relative risk of three dimensions of doctors' health: (a) behaviours that have an impact on doctors' health such as substance use and binge-eating; (b) trouble falling or staying asleep, and insomnia; and (c) daily or weekly symptoms of ill health such as headaches, backache, or fatigue. The other innovation of the current study is that, whereas many previous studies have sampled US doctors [6] or individual specialties such as oncology [4] and surgery,[7] this study sheds new light on the impact of occupational distress on health problems among UK doctors.

*Does occupational distress increase the risk of doctors using alcohol or drugs?*

Workers experiencing occupational distress are more likely to regularly drink alcohol, binge-drink or use drugs as a method of coping.[2,8] Doctors, on average, report equivalent or lower rates of alcohol abuse than the general population [5] but daily alcohol consumption or binge-drinking that does not meet the threshold for defining alcoholism is still problematic,[9,10] and symptomatic of psychological distress. In the US, 10% of doctors drink alcohol daily and 8% report severe alcohol or drug misuse or dependence at some point in their lives.[6] Prescription drug abuse is particularly problematic because doctors are up to 5 times more likely to use prescription drugs than the general population due to easier access or familiarity with prescription drugs, e.g. 24% of US doctors use benzodiazepine and 40% use minor opiates.[6] There are many reasons why doctors drink alcohol or use drugs – not all of which are to do with

1  
2  
3 being distressed – therefore research is needed to clarify if doctors use alcohol/drugs as a way of  
4 coping with occupational distress. The coping function of alcohol/drug use among doctors, as  
5 with the general population, is plausible because alcohol and prescription drugs such as  
6 benzodiazepine and opiates have psychoactive properties. Occupational distress is known to  
7 predict alcohol misuse in the general population [2] but little is known about whether, for  
8 example, doctors with high levels of burnout are at greater risk of using prescription drugs or  
9 alcohol, and whether other types of occupational distress (e.g. work-life imbalance, psychiatric  
10 morbidity, negative coping strategies) have similar effects. Little is also known about the impact  
11 of other job factors on the risk of doctors engaging in substance use such as working in a hospital  
12 versus practising medicine in the community.  
13  
14  
15  
16  
17  
18  
19  
20

21 *Does occupational distress increase the risk of doctors' binge-eating?*

22  
23 Like alcohol or drug use, binge-eating is more prevalent among workers experiencing  
24 occupational distress [11] but, unlike substance use, little is known about binge-eating rates and  
25 risk factors among doctors. Binge-eating can be defined as eating a larger amount of food than  
26 most people in one sitting and finding oneself unable to control ones eating.[12] Binge-eating,  
27 like alcohol or drug use, is a common method of coping with psychological distress because  
28 eating offers an initial sense of comfort.[13,14] That is, however, followed by feelings of shame  
29 or guilt, thus exacerbating distress.[14] This is one of the first studies to assess the prevalence of  
30 binge-eating among UK doctors and to offer insights into whether doctors who binge-eat  
31 experience unpleasant emotions after bingeing. This study will also offer new insights into the  
32 impact of different types of occupational distress (e.g. burnout or work-life imbalance) which,  
33 together with analysing alcohol or drug abuse by doctors, will reveal the consequences of  
34 occupational distress for doctors' health-related behaviours.  
35  
36  
37  
38  
39  
40  
41  
42  
43  
44

45 *Does occupational distress increase the risk of doctors having trouble sleeping or insomnia?*

46  
47 There have been calls for research into the connection between sleep disturbances and doctors'  
48 health [15] but most previous studies have focused on sleep deprivation rather than sleep  
49 disturbances that have a psychological aetiology e.g. trouble falling/staying asleep due to worry  
50 or insomnia. Sleep deprivation can be defined as the lack of the opportunity to sleep, or more  
51 simply as sleeping too few hours each day. Sleep deprivation is associated with  
52  
53  
54  
55  
56  
57  
58  
59  
60

1  
2  
3 depression,[16,17] burnout,[18] suicide risk,[17] relationship difficulties [17] and immunity or  
4 cardiovascular health problems [19] among doctors but sleep deprivation in itself is not  
5 necessarily a sign of psychological distress. Doctors who work long shifts [20] or lack block-  
6 scheduled shifts [21] sleep too few hours because they have no choice. Therefore, rather than  
7 measuring sleep deprivation, this study measured types of sleep disturbance with a psychological  
8 aetiology such as trouble falling asleep, waking up prematurely because of worrying about work,  
9 and insomnia. It is plausible that the risk of these types of sleep disturbance is higher among  
10 doctors suffering from work-life imbalance, psychiatric morbidity, and other types of  
11 occupational distress such as coping with problems at work by blaming oneself or using  
12 substances. This study will evaluate whether UK doctors suffering from occupational distress  
13 have an increased risk of sleep disturbances and insomnia.  
14  
15  
16  
17  
18  
19  
20  
21  
22

### 23 *Does occupational distress increase the risk of doctors presenting with ill health?*

24  
25 There is some research about the physical health of doctors in some specialties (e.g. oncology)[4]  
26 but research is needed to assess whether occupational distress predicts the risk of doctors  
27 suffering from daily or frequent headaches, gastrointestinal problems, and other physical  
28 symptoms. Physical health has a complex range of causes (e.g. health behaviours, genetics and  
29 infections) but people who are distressed are more susceptible to infections because  
30 psychological distress weakens the immune system.[22] The important question, therefore, is the  
31 relative risk of ill health symptoms, comparing doctors with and without occupational distress.  
32 We recognise that the physical health of doctors is shaped by a complex range of factors – only  
33 one of which is occupational distress – because working in a clinical environment can pose some  
34 risk to physical health.[23] This study is one of the first to shed light on the impact of  
35 occupational distress on ill health symptoms among UK doctors.  
36  
37  
38  
39  
40  
41  
42  
43  
44

### 45 *Study aims*

46  
47 This study aims to assess whether doctors suffering from occupational distress have an increased  
48 risk of (i) using alcohol or drugs; (ii) binge-eating; (iii) having sleep problems or insomnia; and  
49 (iv) presenting with daily or frequent symptoms of ill health such as headaches, nausea, and  
50 fatigue. This study will extend previous literature about occupational distress in medicine, which  
51 has focused on burnout and psychiatric morbidity,[3] by measuring and defining occupational  
52 distress in additional ways, e.g. work-life imbalance, job effort, coping with stress through self-  
53  
54  
55  
56  
57  
58  
59  
60



1  
2  
3 blame or through substance use, drawing on previous literature highlighting the multiple  
4 dimensions of occupational distress.[4] This study will also provide new insight into the  
5 prevalence of alcohol/drug use, binge-eating, sleep problems and symptoms of ill health among  
6 UK doctors, extending previous research about doctors from other countries or individual  
7 specialties.[4,7]  
8  
9  
10  
11  
12

## 13 **Method**

### 14 *Patient and public involvement statement*

15  
16  
17 Before the main study 15 doctors took part in a pilot study. Using online software (*Qualtrics*) the  
18 pilot study sought doctors' feedback about the relevance and clarity of questionnaires about  
19 occupational distress and health. The questionnaires were valid, reliable and selected from  
20 previous literature but it was important to utilise feedback from doctors about whether the types  
21 of occupational distress and health/health-related behaviours to be measured were relevant to  
22 doctors, and whether the instructions were clear. Doctors who answered open ended questions in  
23 the pilot study gave generally positive feedback. Feedback from the doctors resulted in some  
24 minor amendments to the wording of demographic questions, questionnaire instructions and the  
25 number of questionnaires was reduced to eliminate similar measures.  
26  
27  
28  
29  
30  
31  
32  
33  
34  
35  
36  
37

### 38 *Study design*

39  
40  
41 The research reported in this article is an analysis of data collected at the baseline stage of a  
42 randomised controlled trial (protocol #NCT02838290) of the effect of an occupational health  
43 intervention on doctors' levels of occupational distress, health and health-related behaviours. The  
44 trial took place from July to November 2016. Due to the complexity of the trial this paper reports  
45 analysis of only the baseline data.  
46  
47  
48  
49  
50

### 51 *Participants and study size*

1  
2  
3 Any medical doctor currently working in the UK was eligible for inclusion in the baseline data  
4 analysis. Doctors learnt about the study through invitations sent on our behalf by 9 medical  
5 Royal Colleges, the British Medical Association's research panel members, and a random  
6 selection of 9 NHS trusts. Doctors took part in this study online on a platform using *Qualtrics*  
7 software.  
8  
9  
10  
11  
12

### 13 *Measures*

14  
15  
16  
17 *Outcome measures:* Doctors completed a variety of questionnaires (see protocol  
18 #NCT02838290). For the purpose of this article, the analysis focused on doctors' health, sleep  
19 and health-related behaviours as outcome measures:  
20  
21

- 22 1. *Alcohol and drug use:* Alcohol dependence was assessed with the Patient Health  
23 Questionnaire [24] and the frequency and quantity of alcohol use was assessed with 3  
24 items from the Alcohol Use Disorder Identification Scale (AUDIT).[25] Two items from  
25 the Brief COPE questionnaire [26] evaluated doctors' tendency to use alcohol or drugs as  
26 a stress coping strategy. Drug use was assessed using a list devised from the Commonly  
27 Abused Drugs Charts [27] and the UK drug misuse declaration.[28] It consisted of 22  
28 illicit and legal drugs as well as over the counter medications.  
29  
30  
31  
32  
33
- 34 2. *Binge-eating habits:* These were measured using the binge-eating disorder items from  
35 the Eating Disorder Diagnostic Scale (as a scale and separate items).[29]  
36  
37
- 38 3. *Sleep disturbances and insomnia:* Insomnia was measured with the Insomnia Severity  
39 Index,[30] an instrument with high reliability 0.891. Sleep problems were items derived  
40 from the Effort-Reward scale [31] and Insomnia Severity Index.[30]  
41  
42
- 43 4. *Ill health symptoms:* The Physical Symptom Inventory [32] comprising 12 items was  
44 used to assess the frequency with which doctors experience various symptoms.  
45  
46  
47

48 *Predictor measures:* The predictor variables and measuring instruments captured different types  
49 of occupational distress and job factors:  
50  
51  
52

- 53 1. *Psychiatric morbidity:* This was measured using the General Health Questionnaire-12  
54 [33] with a high internal reliability of 0.927 in our study.  
55  
56  
57  
58  
59  
60

2. *Burnout*: Emotional exhaustion from the Maslach Burnout Inventory [34] was assessed in this study and had high internal reliability,  $\alpha=0.905$ . Emotional exhaustion was selected because previous research shows that it is the best predictor of stress-related health among the three dimensions.[35]
3. *Job effort*: The Job Effort scale from the Effort-Reward scale [31] measured time pressure, interruptions and demands at work (Cronbach  $\alpha=0.770$ ).
4. *Work-life imbalance*: This was measured using the Work-Family Conflict scale [36] (Cronbach  $\alpha=0.934$ ).
5. *Maladaptive coping strategies*: Two scales from the Brief COPE questionnaire [26] were used: coping through substance use (Cronbach  $\alpha=0.872$ ), and coping through self-blame (Cronbach  $\alpha=0.783$ ).
6. *Work experience*: years working in medicine.
7. *Work place type*: doctors indicated whether they work in a hospital or other setting.

More information about the measures is presented in Table 1.

### *Statistical methods*

Outcome variables were re-coded into binary variables (symptom present or absent, see Table 1). Logistic regression tested the impact of predictors on the odds of the outcomes using SPSS v21 software.

## **Results**

In total, 417 UK doctors participated. The mean age was 47.23 years (SD=10.97), and there was an equivalent split of gender (48% males, 52% females) and seniority (49% consultants, 51% other). 32.7% of doctors had psychiatric morbidity and 55.3% had a type of burnout called emotional exhaustion. The descriptive statistics (mean scores and standard deviations) of predicting factors (efforts, maladaptive coping strategies, and work-life imbalance) are presented in Table 1. Table 1 also shows the level of alcohol/drug use, binge-eating, sleep disturbances,

1  
2  
3 and ill health symptoms among doctors and Tables 2-5 present results from logistic regressions  
4 predicting these health problems.  
5  
6  
7

8 [Insert Table 1]  
9  
10

11 *How many doctors use alcohol or drugs?* Table 1 shows that 53% of doctors drank alcohol  $\geq 2$   
12 times a week, 27% consumed  $\geq 3$  drinks on a typical day of drinking and 44% binge-drank by  
13 consuming 6+ drinks on one occasion. 5% of doctors met the criteria for alcohol dependence:  
14 most doctors did not report significant impairments in their occupational or other functioning as  
15 a result of drinking alcohol. In terms of drug use, 44% of doctors used some type of drugs; 3% of  
16 doctors used prescription opioids, 2% used benzodiazepines, 5% used sleep medication, 5%  
17 smoked tobacco, 7% used herbal or homeopathic remedies and 35% used over-the-counter  
18 medicines. Illegal drug use was rare: only 1 doctor reported cocaine use and 1 doctor used amyl  
19 nitrite. No doctor reported using amphetamines, anabolic steroids, cannabis, ecstasy, heroin,  
20 ketamine, khat, LSD, magic mushrooms, mephedrone, methadone, methamphetamine or  
21 tranquilizers.  
22  
23  
24  
25  
26  
27  
28  
29  
30

31  
32 *Are distressed doctors more likely to use alcohol/drugs?* Coping with stress was the reason given  
33 by many doctors for drinking alcohol or taking drugs, with 34% saying that they used substances  
34 in order to feel better, and 22% used substances to help them get through stressful events. Table  
35 2 shows logistic regression results analysing the effects of occupational distress and job factors  
36 on alcohol and drug use by doctors. The model significance testing shows that the predictors  
37 significantly explained variance in doctors using substances to help them get through something  
38 (6%), drinking alcohol frequently (38%) and large amounts (12%), binge-drinking (28%), and  
39 being alcohol dependent (28%). The predictors did not explain variance in drug use and doctors  
40 using substances to feel better ( $p > 0.05$ ). Doctors who coped with stress by using substances had  
41 a higher risk of frequent alcohol use, binge-drinking, alcohol dependence and drug use  
42 ( $p \leq 0.022$ ). The results summarised in Table 2 also show that having more experience working in  
43 medicine raised the risk of a doctor drinking alcohol frequently (OR=1.036;  $p=0.002$ ) but  
44 lowered the risk of binge-drinking (OR=0.970;  $p=0.007$ ). Doctors who worked in a hospital were  
45 more likely to drink high amounts of alcohol on a typical day of drinking and to binge-drink  
46  
47  
48  
49  
50  
51  
52  
53  
54  
55  
56  
57  
58  
59  
60

(OR $\geq$ 1.672; p $\leq$ 0.044). Doctors who react to stress by blaming themselves are more likely to use substances to get through something (OR=1.374; p=0.039). Burnout, work-life imbalance and job effort were not significant unique predictors of substance use although the combined models were significant. This implies that occupational distress should be considered as a syndrome when understanding its effects on substance abuse. The exception was psychiatric morbidity which had a significant unique effect of decreasing the risk of doctors drinking alcohol 2-3 times or more a week (OR=0.478; p=0.019).

[Insert Table 2]

*How many doctors binge-eat?* Table 1 shows that 35% of doctors ate a large amount of food when they were not physically hungry, 31% ate until they felt uncomfortably full, 24-29% of doctors experienced negative emotions after overeating, like embarrassment, disgust, depression or guilt. We found that 8% of doctors had a binge-eating disorder.

*Are distressed doctors more likely to binge-eat?* Table 3 shows that all models tested were statistically significant and the predictors explained 8.1-17.1% of variance in binge-eating (p<0.05). Types of occupational distress that, individually, significantly predicted binge-eating were: self-blaming, work-life imbalance, and burnout. More experienced doctors were less likely to feel disgusted with themselves after binge-eating (OR=0.966; p=0.009), as were doctors who work in hospitals (OR=0.453; p=0.008). Job effort lowered the risk of a binge-eating disorder (OR=0.179; p<0.001). Psychiatric morbidity, by itself, did not predict binge-eating, and nor did coping with stress through substance use (p>0.05).

[Insert Table 3]

*How many doctors have sleep problems?* Table 1 shows that 22% of doctors had difficulty falling asleep, 35% difficulty staying asleep, 44% were dissatisfied with their sleep pattern, 20% were worried or distressed about a current sleep problem, and 35% of doctors' sleep problems interfered with daily functioning. Thinking about work contributed to sleep problems; 61% of doctors thought about work when they went to bed and 49% had trouble sleeping if they

1  
2  
3 postponed something they were supposed to do that day. The Insomnia Severity Index [30]  
4 showed that 12% of doctors had severe/moderate insomnia.  
5  
6  
7

8 *Are distressed doctors more likely to have sleep problems?* Logistic regression models predicting  
9 seven signs of sleep problems and insomnia are presented in Table 4. All models were  
10 statistically significant explaining from 23.4% to 39.1% of variance, showing that occupational  
11 distress and job factors significantly predicted sleep problems and insomnia among doctors. This  
12 supports the view of occupational distress as a syndrome that increases sleep problems. There  
13 were also several unique effects, showing that certain types of occupational distress can, even in  
14 isolation, predict sleep problems. Table 4 shows, for instance, that doctors with psychiatric  
15 morbidity were more likely to have difficulty falling/staying asleep, think about work when they  
16 went to bed, find that sleep problems interfered with their daily functioning, and insomnia  
17 (OR $\geq$ 2.117;  $p\leq$ 0.026), and burnout increased the risk of all 7 sleep problems (OR $\geq$ 1.344;  
18  $p\leq$ 0.036). Other significant unique predictors of sleep problems among doctors were:  
19 maladaptive coping with stress, work-life imbalance, and working in a hospital ( $p\leq$ 0.030).  
20 Therefore, unlike alcohol/drug use which required a syndrome approach to occupational distress,  
21 the risk of sleep problems or insomnia existed even if doctors were suffering just burnout or one  
22 other type of distress with significant unique effects in Table 4.  
23  
24  
25  
26  
27  
28  
29  
30  
31  
32  
33  
34  
35

36 [Insert Table 4]  
37  
38

39 *How many doctors suffer from daily or frequent ill health?* 69% of doctors had fatigue and  
40 between 19% and 29% frequently experienced other type of ill health problems, e.g. upset  
41 stomach, backache and headaches. Only 8% or fewer doctors reported frequent (daily/weekly)  
42 non-menstrual stomach cramps, constipation, appetite loss and dizziness therefore these  
43 symptoms were not analysed using logistic regression.  
44  
45  
46  
47  
48  
49

50 *Are distressed doctors more likely to have daily or frequent ill health?* Table 5 shows the logistic  
51 regression results that the odds of doctors suffering from frequent ill health are raised by  
52 occupational distress together with years practising medicine and working in a hospital. The  
53 predictors explained 8-35.2% of variance in doctors presenting with fatigue, upset stomach or  
54  
55  
56  
57  
58  
59  
60

1  
2  
3 nausea, headaches, acid/indigestion/heartburn, eye strain, diarrhoea, and ringing in the ears . The  
4 effects on back pain were non-significant ( $p=0.083$ ). Several types of occupational distress had  
5 significant unique effects, meaning that they individually predicted doctors' health: psychiatric  
6 morbidity, burnout, coping with stress by blaming oneself, job effort, and work-life imbalance.  
7 For instance, burnout raised the odds of doctors suffering from fatigue ( $OR=1.804$ ;  $p<0.001$ ); job  
8 effort raised the odds of headaches ( $OR=1.905$ ;  $p=0.030$ ); work-life imbalance raised the odds of  
9 diarrhoea ( $OR=1.717$ ;  $p=0.005$ ); and psychiatric morbidity raised the odds of doctors suffering  
10 from fatigue, upset stomach or nausea, headaches, acid/indigestion/heartburn, and eye strain  
11 ( $OR\geq 1.930$ ;  $p\leq 0.017$ ). Working in a hospital did not, by itself, predict doctors' presentation of ill  
12 health symptoms, and nor did using alcohol or drugs to cope with stress ( $p>0.05$ ). More years of  
13 experience in medicine decreased the odds of doctors having fatigue, upset stomach or nausea  
14 and headaches ( $OR\geq 0.963$ ;  $p\leq 0.024$ ), but more experienced doctors had increased odds of ear  
15 ringing ( $OR=1.050$ ;  $p=0.002$ ).  
16  
17  
18  
19  
20  
21  
22  
23  
24  
25  
26

27 [Insert Table 5]  
28  
29  
30

## 31 Discussion

32  
33

### 34 *Prevalence of occupational distress and health problems among UK doctors*

35  
36  
37

38 This study shows the prevalence of occupational distress and health problems such as ill health  
39 symptoms, and health-related problems (e.g. substance use) among UK doctors. The results  
40 replicate recent systematic reviews about the prevalence of burnout and psychiatric morbidity,[3]  
41 finding that 32.7% of UK doctors have psychiatric morbidity and 55.3% a type of burnout called  
42 emotional exhaustion, while providing new evidence about the prevalence of types of problems  
43 that were unrepresented in previous literature. The results showed that 11% of doctors have  
44 insomnia; 20-61% experience various sleep problems; 5% are alcohol dependent; 27-53% drink  
45 in a hazardous way; 69% had fatigue; 4-33% experience other physical complaints; 8% have a  
46 binge-eating disorder; and 24-35% have binge-eating symptoms. Drug use was rare among  
47 doctors (3% used opioids; 2% benzodiazepines) suggesting that the proportion of doctors getting  
48 drug treatment for anxiety is lower than the proportion of doctors with anxiety (14.7%).[37]  
49  
50  
51  
52  
53  
54  
55  
56  
57  
58  
59  
60

1  
2  
3 Compared to the general population more doctors have psychiatric morbidity (55.3% compared  
4 19%),[1] burnt out (32.7% compared to 24.8%),[38] and have physical complaints such as back  
5 pain (e.g. 34% compared to 8-28% in the general population).[39] However, fewer doctors are  
6 alcohol dependent (5%) compared to the general population whereby 13.9-29.1% have alcohol  
7 use disorder.[40]  
8  
9  
10  
11  
12

### 13 *Occupational distress increases the odds of health problems among UK doctors*

14  
15  
16

17 The results show that occupational distress increases the odds of doctors using substances,  
18 having sleep problems, frequent symptoms of ill health, and binge-eating. Even taking into  
19 consideration whether or not a doctor works in a hospital, the risk of ill health still rises when  
20 doctors have signs of occupational distress such as burnout. Previous research showed that  
21 distress,[2,41] coping strategies [42–44] and job factors [45–50] are associated with ill health  
22 problems. This study replicates previous findings while demonstrating the generalisability of the  
23 effects to a wider range of health issues among UK doctors from various specialties:  
24  
25  
26  
27  
28  
29  
30

31 *Alcohol/drug use:* Distressed doctors are more likely to use alcohol, with 22-34% of  
32 doctors reporting that they use substances to feel better or help them get through stressful  
33 events. Doctors who cope with stress by using substances have a higher risk of frequent  
34 alcohol use, binge-drinking, alcohol dependence and drug use. Doctors who react to stress  
35 by blaming themselves are more likely to use substances to get through something. Having  
36 more experience working in medicine makes a doctor more likely to drink alcohol  
37 frequently but lowers the likelihood of binge-drinking. Doctors who work in a hospital are  
38 more likely to drink high amounts of alcohol on a typical day of drinking and to binge-  
39 drink. In understanding the effects of occupational distress on alcohol or drug use, the  
40 results showed the usefulness of assessing the combined effects of different types of  
41 occupational distress, but that, except for psychiatric morbidity, burnout, work-life  
42 imbalance and job effort do not individually predict alcohol or drug use. This suggests that  
43 occupational distress is best understood as a syndrome when understanding its effect on  
44 alcohol use. These findings extend previous studies which demonstrate that such  
45 occupational stress factors as burnout, depression and psychiatric morbidity, individually  
46  
47  
48  
49  
50  
51  
52  
53  
54  
55  
56  
57  
58  
59  
60



1  
2  
3 predict alcohol defences/abuse.[7,51] The results also show that – for UK doctors –  
4 occupational distress as a syndrome has no significant effect on drug use. Only doctors  
5 who cite substance use as their strategy for coping with stress are significantly more likely  
6 to use drugs – and most of these are prescription or over-the-counter drugs.  
7  
8  
9

10  
11  
12 *Binge-eating:* The risks of doctors' binge-eating and experiencing negative emotions after  
13 over-eating are raised by occupational distress e.g. burnout, coping with stress by blaming  
14 oneself, and work-life imbalance. This aligns with previous studies describing binge-eating  
15 as a method of coping with stress offering an initial sense of comfort.[13,14] More  
16 experienced doctors and doctors who work in hospitals are less likely to have unpleasant  
17 emotions after binge-eating and job effort lowers the risk of a doctor suffering from a  
18 binge-eating disorder. Psychiatric morbidity, by itself, did not predict binge-eating, and nor  
19 did coping with stress through substance use.  
20  
21  
22  
23  
24  
25

26  
27  
28 *Sleep problems:* Occupational distress and job factors significantly predict sleep problems  
29 and insomnia among doctors, supporting the view of occupational distress as a syndrome  
30 that increases sleep problems, whilst also revealing that certain types of occupational  
31 distress can also, individually, predict sleep problems or insomnia among doctors. Previous  
32 research show that physicians with high burnout, for example, are more likely to  
33 experience sleep related problems.[52] This study extends our understanding of the risk  
34 factors and shows that burnout, psychiatric morbidity, maladaptive coping strategies,  
35 work-life imbalance, and working in a hospital increase the risk of sleep problems. This  
36 means that the risk of sleep problems or insomnia exists even if doctors are suffering from  
37 just one of these types of occupational distress. The sleep problems include trouble  
38 falling/staying sleep, worrying about work when trying to sleep, and finding that sleep  
39 problems interfere with daily functioning.  
40  
41  
42  
43  
44  
45  
46  
47  
48

49  
50 *Daily or frequent ill health:* Occupational distress increases the odds of doctors suffering  
51 from fatigue, upset stomach or nausea, headaches, acid/indigestion or heartburn, eye strain,  
52 diarrhoea, and ringing in the ears but not back pain. Psychiatric morbidity, burnout, coping  
53 with stress by blaming oneself, job effort, and work-life imbalance each, as individual  
54  
55  
56  
57  
58  
59  
60

1  
2  
3 predictors, also raise the odds of doctors suffering from frequent ill health. These findings  
4 extend previous studies which investigate how doctors' work conditions link to their ill  
5 health [23] by showing that occupational distress also increases the risk of ill health  
6 problems. Doctors who work in a hospital do not have increased odds of ill health  
7 symptoms, and nor do doctors who use substances to cope with stress. More experienced  
8 doctors have lower odds of fatigue, upset stomach or nausea and headaches, but are at a  
9 greater risk of suffering from ringing ears.  
10  
11  
12  
13  
14  
15  
16

### 17 *Strengths and weaknesses of the study and future research*

18 This study is the first to explore the impact of occupational distress and work factors on the risk  
19 of health problems (sleep problems, substance use, ill health and binge-eating) among UK  
20 doctors from various specialties. It was not possible, however, to calculate the response rate for  
21 this study as it was not clear if all trusts and royal colleges who agreed to take part in this study  
22 actually distributed the invitation and to how many doctors. This study is a part of the bigger  
23 study which used "a gold standard" design and was piloted by consulting doctors. The weakness  
24 of this study, however, is not using a longitudinal design which would let us to conclude on  
25 causation between occupational distress and health problems – but this would be difficult to do  
26 because occupational distress is often a continually occurring phenomenon with seldom a clear  
27 starting point. We encourage future research about work factors not measured in the current  
28 study, for example, how the risk of gastrointestinal problems among doctors changes with patient  
29 caseload or infection exposure and how the risk of ringing ears changes with exposure to  
30 repeated equipment noise in hospitals.  
31  
32  
33  
34  
35  
36  
37  
38  
39  
40

### 41 *The meaning of the study: possible explanations and implications for clinicians and* 42 *policymakers*

43 We recommend that occupational health services for doctors recognise (1) the prevalence of  
44 occupational distress among doctors; (2) that occupational distress increases the risk of health  
45 problem among doctors; and (3) the need to provide early interventions for doctors suffering  
46 from signs of occupational distress to prevent them from adopting negative health behaviours  
47 such as binge-drinking or eating, and to prevent doctors from suffering the long-term health  
48 effects of sleep disturbances and frequent ill health.  
49  
50  
51  
52  
53  
54  
55  
56  
57  
58  
59  
60

### *Acknowledgements*

We are extremely grateful to all the doctors who kindly agreed to take part in this study and the organisations who helped us to reach their doctors.

### *Ethics approval and consent to participate*

The BEI School Ethics Committee at Birkbeck, University of London, approved the study in May 2016. Participants voluntarily consented to take part in this study.

### *Competing interests*

The authors declare that they have no competing interests.

### *Funding*

Not applicable

### *Authors' contributions*

AM and CK participated in the conception and design of the study. AM collected and analysed data. AM and CK were involved in the interpretation of the data and preparation of this article. Both authors read and approved the final manuscript.

### *Data sharing*

No additional data available

## **References**

- 1 Goodwin L, Ben-Zion I, Fear NT, *et al*. Are reports of psychological stress higher in occupational studies? A systematic review across occupational and population based studies. *PLoS One* 2013;**8**. doi:10.1371/journal.pone.0078693
- 2 Ahola K, Honkonen T, Pirkola S, *et al*. Alcohol dependence in relation to burnout among the Finnish working population. *Addiction* 2006;**101**:1438–43. doi:10.1111/j.1360-0443.2006.01539.x
- 3 Imo UO. Burnout and psychiatric morbidity among doctors in the UK: a systematic literature review of prevalence and associated factors. *BJPsych Bull* Published Online First: 2017. doi:10.1192/pb.bp.116.054247

- 1
- 2
- 3
- 4 Medisaukaite A, Kamau C. Prevalence of oncologists in distress: Systematic review and  
4 meta-analysis. *Psychooncology* Published Online First: 2017. doi:10.1002/pon.4382  
5
- 6
- 7 5 Merlo LJ, Gold MS. Prescription opioid abuse and dependence among physicians:  
7 Hypotheses and treatment. *Harv Rev Psychiatry* 2008;**16**:181–94.  
8 doi:10.1080/10673220802160316  
9
- 10
- 11 6 Hughes, H. P, Brandenburg, C. N, Baldwin, L. D, *et al.* Prevalence of Substance Use  
11 Among US Physicians. *JAMA* 1992;**47**:771–3.  
12
- 13
- 14 7 Oreskovich MR, Kaups KL, Balch CM, *et al.* Prevalence of Alcohol Use Disorders  
14 Among American Surgeons. *Arch Surg* 2012;**147**:168. doi:10.1001/archsurg.2011.1481  
15
- 16
- 17 8 Leiter MP, Hakanen JJ, Ahola K, *et al.* Organizational predictors and health consequences  
17 of changes in burnout: A 12-year cohort study. *J Organ Behav* 2012;:n/a-n/a.  
18 doi:10.1002/job.1830  
19
- 20
- 21 9 NHS. Alcohol misuse - NHS. <https://www.nhs.uk/conditions/alcohol-misuse/> (accessed 26  
21 Sep 2018).  
22
- 23
- 24 10 NHS. Binge drinking - NHS. [https://www.nhs.uk/live-well/alcohol-support/binge-](https://www.nhs.uk/live-well/alcohol-support/binge-drinking-effects/)  
24 [drinking-effects/](https://www.nhs.uk/live-well/alcohol-support/binge-drinking-effects/) (accessed 26 Sep 2018).  
25
- 26
- 27 11 Pena Gralle APB, Barbosa Moreno A, Lopes Juvanhol L, *et al.* Job strain and binge eating  
27 among Brazilian workers participating in the ELSA-Brasil study: does BMI matter? *J*  
28 *Occup Health* 2017;**59**:247–55. doi:10.1539/joh.16-0157-OA  
29
- 30
- 31 12 Waller D. Binge eating. *BMJ* 2001;**322**:343. doi:10.1136/BMJ.322.7282.343  
31
- 32
- 33 13 Macht M, Simons G. Emotions and eating in everyday life. *Appetite* 2000;**35**:65–71.  
33 doi:10.1006/appe.2000.0325  
34
- 35
- 36 14 McManus F, Waller Gi. A functional analysis of binge-eating. *Clin Psychol Rev*  
36 1995;**15**:845–63. doi:10.1016/0272-7358(95)00042-9  
37
- 38
- 39 15 Kamau C. Safe working hours protect doctors from sleep deprivation. *BMJ rapid response*  
39 2017;**j4547**. doi:10.1136/bmj.j4547  
40
- 41
- 42 16 Kalmbach DA, Arnedt JT, Song PX, *et al.* Sleep Disturbance and Short Sleep as Risk  
42 Factors for Depression and Perceived Medical Errors in First-Year Residents. *Sleep*  
43 2017;**40**. doi:10.1093/sleep/zsw073  
44
- 45
- 46 17 Eddy R. Sleep deprivation among physicians. *B C Med J* 2005;**47**:176–80.  
46
- 47
- 48 18 Aldrees TM, Aleissa S, Zamakhshary M, *et al.* Physician well-being: Prevalence of  
48 burnout and associated risk factors in a tertiary hospital, Riyadh, Saudi Arabia. *Ann Saudi*  
49 *Med* 2013;**33**:451–6. doi:10.5144/0256-4947.2013.451  
50
- 51
- 52 19 Tobaldini E, Cogliati C, Fiorelli EM, *et al.* One night on-call: Sleep deprivation affects  
52 cardiac autonomic control and inflammation in physicians. *Eur J Intern Med*  
53 2013;**24**:664–70. doi:10.1016/j.ejim.2013.03.011  
54
- 55
- 56
- 57
- 58
- 59

- 1  
2  
3 20 Anderson C, Sullivan JP, Flynn-Evans EE, *et al.* Deterioration of Neurobehavioral  
4 Performance in Resident Physicians During Repeated Exposure to Extended Duration  
5 Work Shifts. *Sleep* 2012;**35**:1137–46. doi:10.5665/sleep.2004  
6  
7 21 Bordley J, Agustin AG, Ahmed MA, *et al.* Restoration of resident sleep and wellness with  
8 block scheduling. *Med Educ* 2017;**51**:1241–9. doi:10.1111/medu.13392  
9  
10 22 Cohen S, Williamson GM. Stress and infectious disease in humans. *Psychol Bull*  
11 1991;**109**:5–24. doi:10.1037//0033-2909.109.1.5  
12  
13 23 Vijendren A, Yung M, Sanchez J. Occupational health issues amongst UK doctors: A  
14 literature review. *Occup Med (Chic Ill)* 2015;**65**:519–28. doi:10.1093/occmed/kqv088  
15  
16 24 Spitzer RL, Williams JBW, Kroenke K, *et al.* Validity and utility of the PRIME-MD  
17 Patient Health Questionnaire in assessment of 3000 obstetric-gynecologic patients: The  
18 PRIME-MD Patient Health Questionnaire Obstetrics-Gynecology Study. *Am J Obstet*  
19 *Gynecol* 2000;**183**:759–69. doi:10.1067/mob.2000.106580  
20  
21 25 Babor TF, Higgins-Biddle JC, Saunders JB, *et al.* The Alcohol Use Disorders  
22 Identification Test Guidelines for Use in Primary Care. *World Heal Organ* 2001;:pp1-40.  
23 doi:10.1177/0269881110393051  
24  
25 26 Carver CS. You want to measure coping but your protocol's too long: Consider the Brief  
26 COPE. *Int. J. Behav. Med.* 1997;**4**:92–100. doi:10.1207/s15327558ijbm0401\_6  
27  
28 27 National Institute on Drug Abuse (NIDA). Commonly Abused Drugs Charts.  
29 2016.<https://www.drugabuse.gov/drugs-abuse/commonly-abused-drugs-charts> (accessed  
30 16 Jan 2016).  
31  
32 28 Office for National Statistics. User Guide to Drug Misuse Statistics Contents. 2015.  
33  
34 29 Stice E, Telch CF, Rizvi SL. Development and validation of the Eating Disorder  
35 Diagnostic Scale: a brief self-report measure of anorexia, bulimia, and binge-eating  
36 disorder. *Psychol Assess* 2000;**12**:123–31. doi:10.1037/1040-3590.12.2.123  
37  
38 30 Bastien CH, Vallières A, Morin CM. Validation of the insomnia severity index as an  
39 outcome measure for insomnia research. *Sleep Med* 2001;**2**:297–307. doi:10.1016/S1389-  
40 9457(00)00065-4  
41  
42 31 Siegrist J, Li J, Montano D. Psychometric properties of the effort-reward imbalance  
43 questionnaire. Germany: 2014. [http://www.uniklinik-](http://www.uniklinik-duesseldorf.de/fileadmin/Datenpool/einrichtungen/institut_fuer_medizinische_soziologie_id54/ERI/Psychometrie.pdf)  
44 [duesseldorf.de/fileadmin/Datenpool/einrichtungen/institut\\_fuer\\_medizinische\\_soziologie\\_](http://www.uniklinik-duesseldorf.de/fileadmin/Datenpool/einrichtungen/institut_fuer_medizinische_soziologie_id54/ERI/Psychometrie.pdf)  
45 [id54/ERI/Psychometrie.pdf](http://www.uniklinik-duesseldorf.de/fileadmin/Datenpool/einrichtungen/institut_fuer_medizinische_soziologie_id54/ERI/Psychometrie.pdf)  
46  
47 32 Spector PE, Jex SM. Development of Four Self-Report Measures of Job Stressors and  
48 Strain: Interpersonal Conflict at Work Scale, Organizational Constraints Scale,  
49 Quantitative Workload Inventory, and Physical Symptoms Inventory. *J Occup Health*  
50 *Psychol* 1998;**3**:356–67.  
51  
52 33 Goldberg DP, Hillier VF. A scaled version of the General Health Questionnaire. *Psychol*  
53  
54  
55  
56  
57  
58  
59

- 1  
2  
3 *Med* 1979;**9**:139–45. doi:10.1017/S0033291700021644  
4
- 5 34 Maslach C, Jackson S. The measurement of experienced Burnout. *J Occup Behav*  
6 1981;**2**:99–113. doi:10.1002/job.4030020205  
7
- 8 35 Maslach C, Leiter MP. Understanding the burnout experience: recent research and its  
9 implications for psychiatry. *World Psychiatry* 2016;**15**:103–11. doi:10.1002/wps.20311  
10
- 11 36 Netemeyer RG, Boles JS, McMurrin R. Development and Validation of Work-Family  
12 Conflict and Family-Work Conflict Scales. *J Appl Psychol* 1996;**81**:400–10.  
13
- 14 37 Johansson R, Carlbring P, Heedman Åsa, *et al.* Depression, anxiety and their comorbidity  
15 in the Swedish general population: point prevalence and the effect on health-related  
16 quality of life. *PeerJ* 2013;**1**:e98. doi:10.7717/peerj.98  
17
- 18 38 Shanafelt TD, Hasan O, Dyrbye LN, *et al.* Changes in Burnout and Satisfaction with  
19 Work-Life Balance in Physicians and the General US Working Population between 2011  
20 and 2014. *Mayo Clin Proc* 2015;**90**:1600–13. doi:10.1016/j.mayocp.2015.08.023  
21
- 22 39 Health & Safety Executive. The role of work stress and psychological factors in the  
23 development of musculoskeletal disorders. 2004.  
24 <http://www.hse.gov.uk/research/rrpdf/rr273.pdf> (accessed 5 May 2018).  
25
- 26 40 Grant BF, Goldstein RB, Saha TD, *et al.* Epidemiology of *DSM-5* Alcohol Use Disorder.  
27 *JAMA Psychiatry* 2015;**72**:757. doi:10.1001/jamapsychiatry.2015.0584  
28
- 29 41 Davey MM, Cummings G, Newburn-Cook C V., *et al.* Predictors of nurse absenteeism in  
30 hospitals: A systematic review. *J Nurs Manag* 2009;**17**:312–30. doi:10.1111/j.1365-  
31 2834.2008.00958.x  
32
- 33 42 Kataoka M, Ozawa K, Tomotake M, *et al.* Occupational stress and its related factors  
34 among university teachers in Japan. *Health (Irvine Calif)* 2014;**06**:299–305.  
35 doi:10.4236/health.2014.65043  
36
- 37 43 Litman JA. The COPE inventory: Dimensionality and relationships with approach- and  
38 avoidance-motives and positive and negative traits. *Pers Individ Dif* 2006;**41**:273–84.  
39 doi:10.1016/j.paid.2005.11.032  
40
- 41 44 Mark G, Smith AP. Occupational stress, job characteristics, coping, and the mental health  
42 of nurses. *Br J Health Psychol* 2012;**17**:505–21. doi:10.1111/j.2044-8287.2011.02051.x  
43
- 44 45 Khan A, Teoh KR, Islam S, *et al.* Psychosocial work characteristics, burnout,  
45 psychological morbidity symptoms and early retirement intentions: a cross-sectional study  
46 of NHS consultants in the UK. *BMJ Open* 2018;**8**:e018720. doi:10.1136/bmjopen-2017-  
47 018720  
48
- 49 46 Lee RT, Seo B, Hladkyj S, *et al.* Correlates of physician burnout across regions and  
50 specialties: a meta-analysis. *Hum Resour Health* 2013;**11**:48. doi:10.1186/1478-4491-11-  
51 48  
52  
53  
54  
55  
56  
57  
58  
59

- 1  
2  
3 47 Umene-nakano W, Kato TA, Kikuchi S, *et al.* Nationwide Survey of Work Environment,  
4 Work-Life Balance and Burnout among Psychiatrists in Japan. *PLoS One* 2013;**8**:1–8.  
5 doi:10.1371/journal.pone.0055189  
6  
7 48 Keller M, Bamberg E, Kersten M, *et al.* Instrument for stress-related job analysis for  
8 hospital physicians: validation of a short version. *J Occup Med Toxicol* 2013;**8**:10–20.  
9 doi:10.1186/1745-6673-8-10  
10  
11 49 Shirom A, Nirel N, Vinokur AD. Work hours and caseload as predictors of physician  
12 burnout: The Mediating Effects by Perceived Workload and by Autonomy. *Appl Psychol*  
13 2010;**59**:539–65. doi:10.1111/j.1464-0597.2009.00411.x  
14  
15 50 Wen J, Cheng Y, Hu X, *et al.* Workload, burnout, and medical mistakes among physicians  
16 in China: A cross-sectional study. *Biosci Trends* 2016;**10**:27–33.  
17 doi:10.5582/bst.2015.01175  
18  
19 51 Taylor C, Graham J, Potts H, *et al.* Impact of hospital consultant's poor mental health on  
20 patient care. *Br J Psychiatry* 2007;**190**:268–9.  
21  
22 52 Vela-Bueno A, Moreno-Jiménez B, Rodríguez-Muñoz A, *et al.* Insomnia and sleep quality  
23 among primary care physicians with low and high burnout levels. *J Psychosom Res*  
24 2008;**64**:435–42. doi:10.1016/j.jpsychores.2007.10.014  
25  
26  
27  
28  
29  
30  
31  
32  
33  
34  
35  
36  
37  
38  
39  
40  
41  
42  
43  
44  
45  
46  
47  
48  
49  
50  
51  
52  
53  
54  
55  
56  
57  
58  
59  
60

Table

Table 1. Description of measures

| Item                                                | N   | No of Items | % of doctors with present symptom/<br>M(SD) | Recoding (if applicable)                                                                                                | Measure                     | Measure/Original Scoring                                      |
|-----------------------------------------------------|-----|-------------|---------------------------------------------|-------------------------------------------------------------------------------------------------------------------------|-----------------------------|---------------------------------------------------------------|
| <b>Sleep problems</b>                               |     |             |                                             |                                                                                                                         |                             |                                                               |
| Difficulty falling asleep                           | 390 | 1           | 22%                                         |                                                                                                                         | The Insomnia Severity Index | 0 (scores showing no insomnia) to 4 (showing severe insomnia) |
| Difficulty staying asleep                           | 390 | 1           | 35%                                         |                                                                                                                         |                             |                                                               |
| Sleep problems interfere with daily functioning     | 389 | 1           | 35%                                         | 0,1 – Symptom absent<br>2,3,4 - Symptom present                                                                         |                             |                                                               |
| Worried or distressed about a current sleep problem | 390 | 1           | 20%                                         |                                                                                                                         |                             |                                                               |
| Dissatisfied with sleep pattern                     | 390 | 1           | 44%                                         | 0,1,2 – Symptom absent ( <i>2 is included as it means "unsure"</i> )<br>3,4 - Symptom present                           | Effort-Reward scale         | 1 (strongly disagree) to 4 (strongly agree)                   |
| Think about work when they go to bed                | 417 | 1           | 61%                                         |                                                                                                                         |                             |                                                               |
| Trouble sleeping if they postpone tasks             | 416 | 1           | 49%                                         |                                                                                                                         | The Insomnia Severity Index | 0 (scores showing no insomnia) to 4 (showing severe insomnia) |
| Insomnia                                            | 390 | 7           | 11%                                         | ≤14 – Symptom absent ( <i>no, subthreshold insomnia</i> )<br>≥15 – Symptom present ( <i>moderate, severe insomnia</i> ) |                             |                                                               |



1  
2  
3  
4  
5  
6  
7  
8  
9  
10  
11  
12  
13  
14  
15  
16  
17  
18  
19  
20  
21  
22  
23  
24  
25  
26  
27  
28  
29  
30  
31  
32  
33  
34  
35  
36  
37  
38  
39  
40  
41  
42  
43  
44  
45  
46  
47

**Substance use**

|                                                 |     |    |     |                                                                                                              |                                  |                                                            |
|-------------------------------------------------|-----|----|-----|--------------------------------------------------------------------------------------------------------------|----------------------------------|------------------------------------------------------------|
| Substance use in order to feel better           | 392 | 1  | 34% |                                                                                                              | The Brief COPE                   | 1 (I usually don't do this) to 4 (I usually do this a lot) |
|                                                 |     |    |     | 1 – Symptom absent<br>2, 3, 4 - Symptom present                                                              |                                  |                                                            |
| Substance use in order to get through something | 393 | 1  | 22% |                                                                                                              |                                  |                                                            |
| Frequency of drinking alcohol                   | 386 | 1  | 53% | 1,2,3 – not drinking or drinking less than 2-3 times a week<br>4,5 - drinking 2-3 times a week or more often | AUDIT                            | 1 (never/1-2) to 5 (daily/more than 10)                    |
| Quantity of drinks on typical day of drinking   | 362 | 1  | 27% | 1 – drinking 1,2 drinks<br>2, 3, 4, 5 – drinking 3 or more drinks                                            |                                  |                                                            |
| Drink 6 or more drinks on one occasion          | 373 | 1  | 44% | 1 – never<br>2, 3, 4, 5 – binge-drinking                                                                     |                                  |                                                            |
| Alcohol dependence                              | 377 | 5  | 5%  | Substance abuse was identified if any of the items were answered “yes”                                       | The Patient Health Questionnaire | 0 (no) and 1 (yes)                                         |
| Drug use                                        | 380 | 22 | 44% | Drug use was identified if any of the items were answered “yes”                                              | Commonly Abused Drugs            | 0 (no) and 1 (yes)                                         |

### Physical symptoms

|                               |     |   |     |                         |                                |                                 |
|-------------------------------|-----|---|-----|-------------------------|--------------------------------|---------------------------------|
| Fatigue                       | 390 | 1 | 69% |                         | The Physical Symptom Inventory | 1 (not at all) to 5 (every day) |
| Upset stomach or nausea       | 390 | 1 | 19% |                         |                                |                                 |
| Backache                      | 390 | 1 | 33% |                         |                                |                                 |
| Headaches                     | 390 | 1 | 27% |                         |                                |                                 |
| Acid indigestion or heartburn | 390 | 1 | 23% |                         |                                |                                 |
| Eye strain                    | 390 | 1 | 29% | 1,2 – Symptom absent    |                                |                                 |
| Diarrhoea                     | 390 | 1 | 12% | 3,4,5 - Symptom present |                                |                                 |
| Ringing in the ears           | 390 | 1 | 13% |                         |                                |                                 |
| Stomach cramps                | 389 | 1 | 8%  |                         |                                |                                 |
| Constipation                  | 390 | 1 | 4%  |                         |                                |                                 |
| Loss of appetite              | 390 | 1 | 7%  |                         |                                |                                 |
| Dizziness                     | 390 | 1 | 8%  |                         |                                |                                 |

### Eating problems

|                                                         |     |   |     |     |                        |                    |
|---------------------------------------------------------|-----|---|-----|-----|------------------------|--------------------|
| Eating large amounts of food when not physically hungry | 316 | 1 | 35% |     | The Binge Eating Scale | 0 (no) and 1 (yes) |
| Eat until feeling uncomfortably full                    | 316 | 1 | 31% | n/a |                        |                    |
| Eat alone because they feel embarrassed                 | 315 | 1 | 24% |     |                        |                    |
| Feel disgusted with themselves,                         | 316 | 1 | 28% |     |                        |                    |

1  
2  
3  
4  
5  
6  
7  
8  
9  
10  
11  
12  
13  
14  
15  
16  
17  
18  
19  
20  
21  
22  
23  
24  
25  
26  
27  
28  
29  
30  
31  
32  
33  
34  
35  
36  
37  
38  
39  
40  
41  
42  
43  
44  
45  
46  
47

depressed or very guilty after overeating  
Feel upset about their uncontrollable eating or weight gain

316 1 29%

Binge eating

316 9 8%

Please see [29] details for coding

The Binge Eating Scale

8 questions - 0 (no) and 1 (yes); 1 question – 0 to 7 days

**Predictor variables**

Burnout: Emotional exhaustion

406 8

55% (M = 3.16; SD = 1.34)  
Recoded for prevalence:  
<27 – Symptom absent  
≥27 – Symptom present

Maslach Burnout Inventory

0 (never) to 6 (every day)

Psychiatric morbidity

393 12

33% (M = 2.19; SD = 0.55)  
Recoded for prevalence:  
0,1 into 0 and 2,3 into 2; &  
< 4 – Symptom absent  
≥4 – Symptom present

General Health Questionnaire-12

0 (better than usual/not at all) to 3 (much less than usual/much less capable)

Effort scale

415 3

M = 3.3 (SD = 0.6)  
n/a

Short Version of Effort-Reward scale

1 (strongly disagree) to 4 (strongly agree)

Work-family Imbalance

416 5

M = 5.26 (SD = 1.38)  
n/a

Work-Family Conflict scale

0 (strongly disagree) to 6 (strongly agree)

1  
2  
3  
4  
5  
6  
7  
8  
9  
10  
11  
12  
13  
14  
15  
16  
17  
18  
19  
20  
21  
22  
23  
24  
25  
26  
27  
28  
29  
30  
31  
32  
33  
34  
35  
36  
37  
38  
39  
40  
41  
42  
43  
44  
45  
46  
47

|                       |     |   |                         |     |
|-----------------------|-----|---|-------------------------|-----|
| Coping: Substance use | 392 | 2 | M = 2.33<br>(SD = 0.88) | n/a |
| Coping: Self-blame    | 393 | 2 | M = 1.37<br>(SD = 0.61) |     |

The  
Brief  
COPE

1 (I usually don't do this)  
to 4 (I usually do this a lot)

For peer review only

**Table 2.** Logistic regression predicting substance use problems

|                                                 |       | Constant                                                  | Psychiatric morbidity | Burnout (emotional exhaustion) | Job effort | Work-life balance | Coping: Self-blame | Coping: Substance use | Work experience (years) | Work place (hospital) |
|-------------------------------------------------|-------|-----------------------------------------------------------|-----------------------|--------------------------------|------------|-------------------|--------------------|-----------------------|-------------------------|-----------------------|
| Substance use in order to feel better           | B     | -2.239                                                    | 0.304                 | 0.162                          | 0.096      | -0.083            | 0.092              | n/a                   | 0.011                   | 0.053                 |
|                                                 | SE    | 0.844                                                     | 0.258                 | 0.123                          | 0.237      | 0.100             | 0.135              | n/a                   | 0.010                   | 0.231                 |
|                                                 | OR    | 0.107                                                     | 1.355                 | 1.175                          | 1.101      | 0.921             | 1.097              | n/a                   | 1.011                   | 1.054                 |
|                                                 | p     | 0.008                                                     | 0.239                 | 0.190                          | 0.685      | 0.411             | 0.493              | n/a                   | 0.278                   | 0.819                 |
|                                                 | Model | X <sup>2</sup> (7)=10.96; p=0.140; R <sup>2</sup> =0.04   |                       |                                |            |                   |                    |                       |                         |                       |
| Substance use in order to get through something | B     | -3.034                                                    | 0.423                 | 0.085                          | 0.202      | -0.179            | <b>0.318</b>       | n/a                   | 0.002                   | 0.005                 |
|                                                 | SE    | 0.963                                                     | 0.289                 | 0.142                          | 0.274      | 0.113             | <b>0.154</b>       | n/a                   | 0.012                   | 0.266                 |
|                                                 | OR    | 0.048                                                     | 1.527                 | 1.089                          | 1.224      | .836              | <b>1.374</b>       | n/a                   | 1.002                   | 1.005                 |
|                                                 | p     | 0.002                                                     | 0.143                 | 0.551                          | 0.461      | 0.113             | <b>0.039</b>       | n/a                   | 0.859                   | 0.986                 |
|                                                 | Model | X <sup>2</sup> (7)=14.76; p=0.039; R <sup>2</sup> =0.059  |                       |                                |            |                   |                    |                       |                         |                       |
| Drinking alcohol 2-3 times a week or more often | B     | -2.297                                                    | <b>-0.739</b>         | 0.203                          | -0.360     | 0.086             | -0.183             | <b>2.936</b>          | <b>0.035</b>            | 0.013                 |
|                                                 | SE    | 1.001                                                     | <b>0.316</b>          | 0.141                          | 0.256      | 0.114             | 0.155              | <b>0.393</b>          | <b>0.011</b>            | 0.257                 |
|                                                 | OR    | 0.101                                                     | <b>0.478</b>          | 1.226                          | 0.698      | 1.090             | 0.833              | <b>18.836</b>         | <b>1.036</b>            | 1.013                 |
|                                                 | p     | 0.022                                                     | <b>0.019</b>          | 0.148                          | 0.160      | 0.449             | 0.237              | <b>&lt;0.001</b>      | <b>0.002</b>            | 0.960                 |
|                                                 | Model | X <sup>2</sup> (8)=123.03; p<0.001; R <sup>2</sup> =0.379 |                       |                                |            |                   |                    |                       |                         |                       |
| Drink more than 3 drinks typically              | B     | -2.593                                                    | -0.222                | -0.041                         | 0.185      | -0.004            | -0.083             | <b>0.955</b>          | 0.002                   | <b>0.594</b>          |
|                                                 | SE    | 0.975                                                     | 0.314                 | 0.141                          | 0.281      | 0.119             | 0.161              | <b>0.206</b>          | 0.012                   | <b>0.276</b>          |
|                                                 | OR    | 0.075                                                     | 0.801                 | 0.772                          | 1.203      | 0.996             | 0.920              | <b>2.599</b>          | 1.002                   | <b>1.812</b>          |

|                                              |       | Constan<br>t                                              | Psychiatric<br>morbidity | Burnout<br>(emotional<br>exhaustion) | Job<br>effort | Work-life<br>balance | Coping:<br>Self-<br>blame | Coping:<br>Substance<br>use | Work<br>experienc<br>e (years) | Work plac<br>(hospital) |
|----------------------------------------------|-------|-----------------------------------------------------------|--------------------------|--------------------------------------|---------------|----------------------|---------------------------|-----------------------------|--------------------------------|-------------------------|
|                                              | p     | 0.008                                                     | 0.480                    | 0.960                                | 0.511         | 0.971                | 0.604                     | <0.001                      | 0.885                          | 0.031                   |
|                                              | Model | X <sup>2</sup> (8)=29.10; p<0.001; R <sup>2</sup> =0.118  |                          |                                      |               |                      |                           |                             |                                |                         |
| Drink 6 or<br>more drinks on<br>one occasion | B     | -0.341                                                    | -0.481                   | 0.038                                | -0.440        | 0.148                | -0.190                    | 1.849                       | -0.030                         | 0.514                   |
|                                              | SE    | 0.942                                                     | 0.308                    | 0.135                                | 0.260         | 0.113                | 0.151                     | 0.267                       | 0.011                          | 0.255                   |
|                                              | OR    | 0.711                                                     | 0.618                    | 1.039                                | 0.644         | 1.159                | 0.827                     | 6.355                       | 0.970                          | 1.672                   |
|                                              | p     | 0.717                                                     | 0.118                    | 0.777                                | 0.090         | 0.191                | 0.209                     | <0.001                      | 0.007                          | 0.044                   |
|                                              | Model | X <sup>2</sup> (8)=83.18; p<0.001; R <sup>2</sup> =0.279  |                          |                                      |               |                      |                           |                             |                                |                         |
| Alcohol<br>dependence                        | B     | -3.171                                                    | -0.047                   | 0.037                                | -0.855        | 0.162                | -0.091                    | 1.819                       | -0.041                         | 0.095                   |
|                                              | SE    | 1.781                                                     | 0.581                    | 0.286                                | 0.623         | 0.269                | 0.350                     | 0.359                       | 0.028                          | 0.616                   |
|                                              | OR    | 0.042                                                     | 0.955                    | 1.037                                | 0.425         | 1.176                | 0.913                     | 6.165                       | 0.960                          | 1.100                   |
|                                              | p     | 0.075                                                     | 0.936                    | 0.898                                | 0.170         | 0.548                | 0.795                     | <0.001                      | 0.153                          | 0.877                   |
|                                              | Model | X <sup>2</sup> (8)=34.648; p<0.001; R <sup>2</sup> =0.280 |                          |                                      |               |                      |                           |                             |                                |                         |
| Drug use                                     | B     | -1.732                                                    | -0.084                   | 0.073                                | 0.192         | 0.067                | 0.068                     | 0.425                       | -0.011                         | -0.047                  |
|                                              | SE    | 0.830                                                     | 0.256                    | 0.120                                | 0.228         | 0.099                | 0.133                     | 0.186                       | 0.010                          | 0.226                   |
|                                              | OR    | 0.177                                                     | 0.92                     | 1.076                                | 1.211         | 1.069                | 1.070                     | 1.530                       | 0.989                          | 0.954                   |
|                                              | p     | 0.037                                                     | 0.744                    | 0.541                                | 0.400         | 0.501                | 0.608                     | 0.022                       | 0.287                          | 0.835                   |
|                                              | Model | X <sup>2</sup> (8)=13.935; p=0.083; R <sup>2</sup> =0.051 |                          |                                      |               |                      |                           |                             |                                |                         |

Note. n/a – scale is not included in the analysis because predictor is a part of it. <sup>a</sup> 1= Hospital (n=239); 0 = Other (n=175)

**Table 3.** Logistic regression predicting substance binge-eating problems

|                                                         |       | Constant                                                  | Psychiatric morbidity | Burnout (emotional exhaustion) | Job effort | Work-life balance | Coping: Self-blame | Coping: Substance use | Work experience (years) | Work place (hospital) <sup>a</sup> |
|---------------------------------------------------------|-------|-----------------------------------------------------------|-----------------------|--------------------------------|------------|-------------------|--------------------|-----------------------|-------------------------|------------------------------------|
| Eating large amounts of food when not physically hungry | B     | -1.831                                                    | 0.344                 | 0.127                          | -0.403     | 0.176             | <b>0.410</b>       | -0.094                | -0.022                  | -0.040                             |
|                                                         | SE    | 0.935                                                     | 0.290                 | 0.142                          | 0.275      | 0.124             | <b>0.156</b>       | 0.208                 | 0.011                   | 0.271                              |
|                                                         | OR    | 0.160                                                     | 1.410                 | 1.136                          | 0.669      | 1.193             | <b>1.507</b>       | 0.910                 | 0.978                   | 0.961                              |
|                                                         | p     | 0.050                                                     | 0.236                 | 0.370                          | 0.143      | 0.156             | <b>0.009</b>       | 0.652                 | 0.052                   | 0.883                              |
|                                                         | Model | X <sup>2</sup> (8)=29.537; p<0.001; R <sup>2</sup> =0.127 |                       |                                |            |                   |                    |                       |                         |                                    |
| Eat until feeling uncomfortably full                    | B     | -2.229                                                    | 0.064                 | 0.132                          | -0.186     | <b>0.271</b>      | 0.297              | -0.117                | -0.018                  | -0.342                             |
|                                                         | SE    | 0.972                                                     | 0.294                 | 0.144                          | 0.278      | <b>0.131</b>      | 0.159              | 0.214                 | 0.012                   | 0.275                              |
|                                                         | OR    | 0.108                                                     | 1.066                 | 1.141                          | 0.831      | <b>1.311</b>      | 1.346              | 0.890                 | 0.982                   | 0.710                              |
|                                                         | p     | 0.022                                                     | 0.828                 | 0.359                          | 0.504      | <b>0.038</b>      | 0.062              | 0.585                 | 0.121                   | 0.212                              |
|                                                         | Model | X <sup>2</sup> (8)=22.420; p=0.004; R <sup>2</sup> =0.100 |                       |                                |            |                   |                    |                       |                         |                                    |
| Eat alone because they feel embarrassed                 | B     | -3.111                                                    | 0.233                 | 0.213                          | -0.139     | 0.112             | 0.378              | 0.089                 | -0.015                  | -0.386                             |
|                                                         | SE    | 1.068                                                     | 0.314                 | 0.158                          | 0.307      | 0.139             | 0.175              | 0.220                 | 0.013                   | 0.300                              |
|                                                         | OR    | 0.045                                                     | 1.262                 | 1.237                          | 0.870      | 1.119             | 1.46               | 1.093                 | 0.985                   | 0.680                              |
|                                                         | p     | 0.004                                                     | 0.458                 | 0.178                          | 0.650      | 0.418             | 0.031              | 0.686                 | 0.255                   | 0.199                              |
|                                                         | Model | X <sup>2</sup> (8)=21.890; p=0.005; R <sup>2</sup> =0.105 |                       |                                |            |                   |                    |                       |                         |                                    |
| Feel disgusted                                          | B     | -2.237                                                    | 0.079                 | <b>0.321</b>                   | -0.313     | 0.208             | 0.335              | 0.154                 | <b>-0.034</b>           | <b>-0.791</b>                      |

|                |       | Constan<br>t                                              | Psychiatric<br>morbidity | Burnout<br>(emotional<br>exhaustion) | Job<br>effort    | Work-life<br>balance | Coping:<br>Self-<br>blame | Coping:<br>Substance<br>use | Work<br>experienc<br>e (years) | Work place<br>(hospital) <sup>a</sup> |
|----------------|-------|-----------------------------------------------------------|--------------------------|--------------------------------------|------------------|----------------------|---------------------------|-----------------------------|--------------------------------|---------------------------------------|
| with           | SE    | 1.036                                                     | 0.310                    | <b>0.155</b>                         | 0.299            | 0.138                | 0.172                     | 0.218                       | <b>0.013</b>                   | <b>0.298</b>                          |
| themselves,    | OR    | 0.107                                                     | 1.082                    | <b>1.378</b>                         | 0.731            | 1.231                | 1.398                     | 1.166                       | <b>0.966</b>                   | <b>0.453</b>                          |
| depressed or   | p     | 0.031                                                     | 0.799                    | <b>0.038</b>                         | 0.295            | 0.132                | 0.052                     | 0.481                       | <b>0.009</b>                   | <b>0.008</b>                          |
| very guilty    | Model | X <sup>2</sup> (8)=38.029; p<0.001; R <sup>2</sup> =0.171 |                          |                                      |                  |                      |                           |                             |                                |                                       |
| after          |       |                                                           |                          |                                      |                  |                      |                           |                             |                                |                                       |
| overeating     |       |                                                           |                          |                                      |                  |                      |                           |                             |                                |                                       |
| Feel upset     | B     | -2.367                                                    | -0.187                   | <b>0.324</b>                         | -0.234           | 0.206                | <b>0.337</b>              | 0.021                       | -0.015                         | -0.200                                |
| about their    | SE    | 0.998                                                     | 0.302                    | <b>0.150</b>                         | 0.287            | 0.133                | <b>0.164</b>              | 0.212                       | 0.012                          | 0.282                                 |
| uncontrollable | OR    | 0.094                                                     | 0.830                    | <b>1.383</b>                         | 0.792            | 1.228                | <b>1.400</b>              | 1.021                       | 0.986                          | 0.819                                 |
| eating or      | p     | 0.018                                                     | 0.537                    | <b>0.030</b>                         | 0.416            | 0.121                | <b>0.040</b>              | 0.922                       | 0.231                          | 0.478                                 |
| weight gain    | Model | X <sup>2</sup> (8)=23.374; p=0.003; R <sup>2</sup> =0.106 |                          |                                      |                  |                      |                           |                             |                                |                                       |
| Binge eating   | B     | -1.064                                                    | -0.343                   | <b>0.610</b>                         | <b>-1.678</b>    | 0.250                | 0.473                     | 0.220                       | -0.014                         | 0.224                                 |
|                | SE    | 1.395                                                     | 0.445                    | <b>0.237</b>                         | <b>0.443</b>     | 0.219                | 0.253                     | 0.309                       | 0.019                          | 0.444                                 |
|                | OR    | 0.345                                                     | 0.710                    | <b>1.841</b>                         | <b>0.187</b>     | 1.284                | 1.606                     | 1.246                       | 0.986                          | 1.251                                 |
|                | p     | 0.446                                                     | 0.440                    | <b>0.010</b>                         | <b>&lt;0.001</b> | 0.253                | 0.062                     | 0.477                       | 0.458                          | 0.614                                 |
|                | Model | X <sup>2</sup> (8)=27.089; p=0.001; R <sup>2</sup> =0.163 |                          |                                      |                  |                      |                           |                             |                                |                                       |

Note. <sup>a</sup> 1= Hospital (n=239); 0 = Other (n=175)



**Table 4.** Logistic regression predicting sleep problems

|                                 |       | Constant                                                  | Psychiatric morbidity | Burnout (emotional exhaustion) | Job effort | Work-life balance | Coping: Self-blame | Coping: Substance use | Work experience (years) | Work place (hospital) <sup>a</sup> |
|---------------------------------|-------|-----------------------------------------------------------|-----------------------|--------------------------------|------------|-------------------|--------------------|-----------------------|-------------------------|------------------------------------|
| Difficulty falling asleep       | B     | -5.019                                                    | <b>0.906</b>          | <b>0.393</b>                   | -0.303     | 0.107             | -0.039             | <b>0.617</b>          | -0.022                  | <b>0.669</b>                       |
|                                 | SE    | 1.098                                                     | <b>0.304</b>          | <b>0.158</b>                   | 0.313      | 0.139             | 0.171              | <b>0.210</b>          | 0.013                   | <b>0.308</b>                       |
|                                 | OR    | 0.007                                                     | <b>2.474</b>          | <b>1.482</b>                   | 0.738      | 1.113             | 0.962              | <b>1.854</b>          | 0.979                   | <b>1.953</b>                       |
|                                 | p     | <0.001                                                    | <b>0.003</b>          | <b>0.013</b>                   | 0.333      | 0.443             | 0.822              | <b>0.003</b>          | 0.103                   | <b>0.030</b>                       |
|                                 | Model | X <sup>2</sup> (8)=65.69; p<0.001; R <sup>2</sup> = 0.249 |                       |                                |            |                   |                    |                       |                         |                                    |
| Difficulty staying asleep       | B     | -5.593                                                    | <b>0.829</b>          | <b>0.468</b>                   | -0.022     | 0.038             | 0.155              | <b>0.443</b>          | 0.014                   | 0.275                              |
|                                 | SE    | 1.014                                                     | <b>0.286</b>          | <b>0.137</b>                   | 0.267      | 0.114             | 0.148              | <b>0.202</b>          | 0.012                   | 0.257                              |
|                                 | OR    | 0.004                                                     | <b>2.291</b>          | <b>1.596</b>                   | 0.978      | 1.039             | 1.168              | <b>1.557</b>          | 1.014                   | 1.317                              |
|                                 | p     | <0.001                                                    | <b>0.004</b>          | <b>0.001</b>                   | 0.933      | 0.741             | 0.296              | <b>0.028</b>          | 0.233                   | 0.285                              |
|                                 | Model | X <sup>2</sup> (8)=79.09; p<0.001; R <sup>2</sup> =0.264  |                       |                                |            |                   |                    |                       |                         |                                    |
| Dissatisfied with sleep pattern | B     | -3.678                                                    | <b>0.962</b>          | <b>0.536</b>                   | -0.142     | -0.050            | -0.006             | 0.280                 | -0.014                  | 0.438                              |
|                                 | SE    | 0.937                                                     | <b>0.292</b>          | <b>0.134</b>                   | 0.256      | 0.108             | 0.143              | 0.200                 | 0.011                   | 0.250                              |
|                                 | OR    | 0.025                                                     | <b>2.617</b>          | <b>1.710</b>                   | 0.868      | 0.642             | 0.994              | 1.324                 | 0.986                   | 1.549                              |
|                                 | p     | <0.001                                                    | <b>0.001</b>          | <b>&lt;0.001</b>               | 0.579      | 0.951             | 0.966              | 0.160                 | 0.200                   | 0.080                              |
|                                 | Model | X <sup>2</sup> (8)=85.18; p<0.001; R <sup>2</sup> =0.274  |                       |                                |            |                   |                    |                       |                         |                                    |
| Sleep problems interfere with   | B     | -5.352                                                    | <b>1.047</b>          | <b>0.492</b>                   | -0.303     | 0.058             | <b>0.347</b>       | <b>0.485</b>          | -0.016                  | 0.483                              |
|                                 | SE    | 1.040                                                     | <b>0.299</b>          | <b>0.144</b>                   | 0.283      | 0.120             | <b>0.153</b>       | <b>0.208</b>          | 0.012                   | 0.272                              |

|                                                     |       | Constant                                                  | Psychiatric morbidity | Burnout (emotional exhaustion) | Job effort | Work-life balance | Coping: Self-blame | Coping: Substance use | Work experience (years) | Work place (hospital) <sup>a</sup> |
|-----------------------------------------------------|-------|-----------------------------------------------------------|-----------------------|--------------------------------|------------|-------------------|--------------------|-----------------------|-------------------------|------------------------------------|
| daily functioning                                   | OR    | 0.005                                                     | <b>2.848</b>          | <b>1.6360</b>                  | 0.739      | 1.059             | <b>1.414</b>       | <b>1.625</b>          | 0.984                   | 1.621                              |
|                                                     | p     | <0.001                                                    | <b>&lt;0.001</b>      | <b>0.001</b>                   | 0.284      | 0.631             | <b>0.023</b>       | <b>0.019</b>          | 0.187                   | 0.075                              |
|                                                     | Model | X <sup>2</sup> (8)=102.74; p<0.001; R <sup>2</sup> =0.333 |                       |                                |            |                   |                    |                       |                         |                                    |
| Worried or distressed about a current sleep problem | B     | -6.003                                                    | <b>1.342</b>          | <b>0.570</b>                   | -0.414     | 0.014             | 0.267              | -0.033                | 0.013                   | <b>0.776</b>                       |
|                                                     | SE    | 1.202                                                     | <b>0.321</b>          | <b>0.171</b>                   | 0.340      | 0.146             | 0.179              | 0.232                 | 0.014                   | <b>0.331</b>                       |
|                                                     | OR    | 0.002                                                     | <b>3.826</b>          | <b>1.768</b>                   | 0.661      | 1.014             | 1.306              | 0.968                 | 0.987                   | <b>2.172</b>                       |
|                                                     | p     | <0.001                                                    | <b>&lt;0.001</b>      | <b>0.001</b>                   | 0.224      | 0.924             | 0.136              | 0.888                 | 0.362                   | <b>0.019</b>                       |
|                                                     | Model | X <sup>2</sup> (8)=86.58; p<0.001; R <sup>2</sup> =0.327  |                       |                                |            |                   |                    |                       |                         |                                    |
| Think about work when they go to bed                | B     | -6.476                                                    | <b>0.750</b>          | <b>0.295</b>                   | 0.214      | <b>0.456</b>      | <b>0.616</b>       | -0.053                | -0.010                  | 0.399                              |
|                                                     | SE    | 1.091                                                     | <b>0.337</b>          | <b>0.141</b>                   | 0.263      | <b>0.116</b>      | <b>0.160</b>       | 0.227                 | 0.012                   | 0.263                              |
|                                                     | OR    | 0.002                                                     | <b>2.117</b>          | <b>1.344</b>                   | 1.238      | <b>1.577</b>      | <b>1.851</b>       | 0.948                 | 0.990                   | 1.491                              |
|                                                     | p     | <0.001                                                    | <b>0.026</b>          | <b>0.036</b>                   | 0.416      | <b>&lt;0.001</b>  | <b>&lt;0.001</b>   | 0.814                 | 0.393                   | 0.128                              |
|                                                     | Model | X <sup>2</sup> (8)=128.23; p<0.001; R <sup>2</sup> =0.391 |                       |                                |            |                   |                    |                       |                         |                                    |
| Trouble sleeping if they postpone tasks             | B     | -3.377                                                    | 0.434                 | <b>0.337</b>                   | -0.273     | 0.243             | <b>0.460</b>       | 0.090                 | -0.013                  | 0.011                              |
|                                                     | SE    | 0.901                                                     | 0.277                 | <b>0.128</b>                   | 0.247      | 0.107             | <b>0.140</b>       | 0.196                 | 0.011                   | 0.239                              |
|                                                     | OR    | 0.034                                                     | 1.544                 | <b>1.401</b>                   | 0.761      | 1.275             | <b>1.584</b>       | 1.094                 | 0.988                   | 1.011                              |
|                                                     | p     | <0.001                                                    | 0.117                 | <b>0.008</b>                   | 0.270      | 0.023             | <b>0.001</b>       | 0.648                 | 0.237                   | 0.965                              |
|                                                     | Model | X <sup>2</sup> (8)=72.32; p<0.001; R <sup>2</sup> =0.234  |                       |                                |            |                   |                    |                       |                         |                                    |

|          |       | Constan                                                  | Psychiatric      | Burnout      | Job    | Work-life | Coping: | Coping:   | Work      | Work place              |
|----------|-------|----------------------------------------------------------|------------------|--------------|--------|-----------|---------|-----------|-----------|-------------------------|
|          |       | t                                                        | morbidity        | (emotional   | effort | balance   | Self-   | Substance | experienc | (hospital) <sup>a</sup> |
|          |       |                                                          |                  | exhaustion)  |        |           | blame   | use       | e (years) |                         |
| Insomnia | B     | -8.627                                                   | <b>1.458</b>     | <b>0.597</b> | -0.109 | 0.035     | 0.346   | 0.148     | -0.025    | 0.802                   |
|          | SE    | 1.600                                                    | <b>0.378</b>     | <b>0.216</b> | 0.433  | 0.191     | 0.226   | 0.270     | 0.018     | 0.417                   |
|          | OR    | <0.001                                                   | <b>4.299</b>     | <b>1.817</b> | .897   | 1.036     | 1.414   | 1.160     | .975      | 2.231                   |
|          | p     | <0.001                                                   | <b>&lt;0.001</b> | <b>0.006</b> | 0.802  | 0.854     | 0.126   | 0.582     | 0.162     | 0.054                   |
|          | Model | X <sup>2</sup> (8)=78.24; p<0.001; R <sup>2</sup> =0.360 |                  |              |        |           |         |           |           |                         |

Note. <sup>a</sup> 1= Hospital (n=239); 0 = Other (n=175)

1  
2  
3  
4  
5  
6  
7  
8  
9  
10  
11  
12  
13  
14  
15  
16  
17  
18  
19  
20  
21  
22  
23  
24  
25  
26  
27  
28  
29  
30  
31  
32  
33  
34  
35  
36  
37  
38  
39  
40  
41  
42  
43  
44  
45  
46  
47

**Table 5.** Logistic regression predicting ill-health

|                         |       | Constant                                                   | Psychiatric morbidity | Burnout (emotional exhaustion) | Job effort   | Work-life balance | Coping: Self-blame | Coping: Substance use | Work experience (years) | Work place (hospital) <sup>a</sup> |
|-------------------------|-------|------------------------------------------------------------|-----------------------|--------------------------------|--------------|-------------------|--------------------|-----------------------|-------------------------|------------------------------------|
| Fatigue                 | B     | -3.632                                                     | <b>0.947</b>          | <b>0.590</b>                   | 0.127        | 0.056             | 0.308              | 0.083                 | <b>-0.029</b>           | -0.130                             |
|                         | SE    | 1.079                                                      | <b>0.386</b>          | <b>0.152</b>                   | 0.267        | 0.115             | 0.164              | 0.247                 | <b>0.012</b>            | 0.276                              |
|                         | OR    | 0.026                                                      | <b>2.577</b>          | <b>1.804</b>                   | 1.135        | 1.058             | 1.360              | 1.087                 | <b>0.972</b>            | 0.878                              |
|                         | p     | 0.001                                                      | <b>0.014</b>          | <b>&lt;0.001</b>               | 0.635        | 0.623             | 0.060              | 0.735                 | <b>0.019</b>            | 0.637                              |
|                         | Model | X <sup>2</sup> (8)=106.899; p<0.001; R <sup>2</sup> =0.352 |                       |                                |              |                   |                    |                       |                         |                                    |
| Upset stomach or nausea | B     | -3.970                                                     | <b>1.265</b>          | 0.094                          | 0.091        | -0.011            | 0.057              | -0.200                | <b>-0.038</b>           | -0.059                             |
|                         | SE    | 1.089                                                      | <b>0.312</b>          | 0.157                          | 0.313        | 0.136             | 0.173              | 0.237                 | <b>0.014</b>            | 0.303                              |
|                         | OR    | 0.019                                                      | <b>3.544</b>          | 1.098                          | 1.095        | .989              | 1.059              | 0.819                 | <b>0.963</b>            | 0.942                              |
|                         | p     | <0.001                                                     | <b>&lt;0.001</b>      | 0.550                          | 0.771        | 0.936             | 0.742              | 0.399                 | <b>0.006</b>            | 0.845                              |
|                         | Model | X <sup>2</sup> (8)=45.36; p<0.001; R <sup>2</sup> =0.185   |                       |                                |              |                   |                    |                       |                         |                                    |
| Backache                | B     | -2.011                                                     | 0.218                 | 0.176                          | -0.172       | 0.161             | 0.026              | -0.070                | -0.001                  | -0.025                             |
|                         | SE    | 0.863                                                      | 0.262                 | 0.126                          | 0.244        | 0.108             | 0.139              | 0.190                 | 0.010                   | 0.237                              |
|                         | OR    | 0.134                                                      | 1.243                 | 1.193                          | 0.842        | 1.175             | 1.026              | 0.932                 | 0.999                   | 0.975                              |
|                         | p     | 0.020                                                      | 0.407                 | 0.161                          | 0.481        | 0.138             | 0.854              | 0.712                 | 0.955                   | 0.917                              |
|                         | Model | X <sup>2</sup> (8)=13.96; p=0.083; R <sup>2</sup> =0.051   |                       |                                |              |                   |                    |                       |                         |                                    |
| Headaches               | B     | -6.523                                                     | <b>0.944</b>          | 0.272                          | <b>0.644</b> | 0.069             | 0.035              | 0.132                 | <b>-0.029</b>           | 0.394                              |
|                         | SE    | 1.114                                                      | <b>0.293</b>          | 0.143                          | <b>0.297</b> | 0.125             | 0.158              | 0.208                 | <b>0.013</b>            | 0.280                              |
|                         | OR    | 0.001                                                      | <b>2.570</b>          | 1.313                          | <b>1.905</b> | 1.071             | 1.035              | 1.141                 | <b>0.972</b>            | 1.483                              |

|                 |       | Constan<br>t                                              | Psychiatric<br>morbidity | Burnout<br>(emotional<br>exhaustion) | Job<br>effort | Work-life<br>balance | Coping:<br>Self-<br>blame | Coping:<br>Substance<br>use | Work<br>experienc<br>e (years) | Work place<br>(hospital) <sup>a</sup> |
|-----------------|-------|-----------------------------------------------------------|--------------------------|--------------------------------------|---------------|----------------------|---------------------------|-----------------------------|--------------------------------|---------------------------------------|
|                 | p     | <0.001                                                    | <b>0.001</b>             | 0.057                                | <b>0.030</b>  | 0.580                | 0.826                     | 0.527                       | <b>0.024</b>                   | 0.160                                 |
|                 | Model | X <sup>2</sup> (8)=75.67; p<0.001; R <sup>2</sup> =0.267  |                          |                                      |               |                      |                           |                             |                                |                                       |
| Acid            | B     | -4.707                                                    | <b>0.826</b>             | 0.120                                | 0.323         | -0.011               | 0.007                     | -0.062                      | 0.007                          | 0.185                                 |
| indigestion or  | SE    | 1.030                                                     | <b>0.290</b>             | 0.142                                | 0.284         | 0.119                | 0.158                     | 0.209                       | 0.012                          | 0.270                                 |
| heartburn       | OR    | 0.009                                                     | <b>2.284</b>             | 1.128                                | 1.382         | 0.989                | 1.007                     | 0.940                       | 1.007                          | 1.203                                 |
|                 | p     | <0.001                                                    | <b>0.004</b>             | 0.398                                | 0.255         | 0.928                | 0.965                     | 0.768                       | 0.549                          | 0.493                                 |
|                 | Model | X <sup>2</sup> (8)=27.78; p=0.001; R <sup>2</sup> =0.109  |                          |                                      |               |                      |                           |                             |                                |                                       |
| Eye strain      | B     | -3.929                                                    | <b>0.657</b>             | -0.06                                | 0.496         | 0.066                | -0.027                    | 0.088                       | -0.012                         | -0.129                                |
|                 | SE    | 0.945                                                     | <b>0.275</b>             | 0.13                                 | 0.259         | 0.110                | 0.146                     | 0.194                       | 0.011                          | 0.249                                 |
|                 | OR    | 0.020                                                     | <b>1.930</b>             | 0.942                                | 1.641         | 1.068                | 0.973                     | 1.092                       | 0.988                          | 0.879                                 |
|                 | p     | <0.001                                                    | <b>0.017</b>             | 0.647                                | 0.056         | 0.550                | 0.851                     | 0.650                       | 0.299                          | 0.606                                 |
|                 | Model | X <sup>2</sup> (8)= 22.45; p=0.004; R <sup>2</sup> =0.084 |                          |                                      |               |                      |                           |                             |                                |                                       |
| Diarrhea        | B     | -5.574                                                    | 0.576                    | -0.155                               | -0.245        | <b>0.541</b>         | 0.212                     | -0.020                      | 0.002                          | 0.148                                 |
|                 | SE    | 1.317                                                     | 0.349                    | 0.179                                | 0.363         | <b>0.191</b>         | 0.198                     | 0.259                       | 0.015                          | 0.350                                 |
|                 | OR    | 0.004                                                     | 1.779                    | 0.857                                | 0.783         | <b>1.717</b>         | 1.237                     | 0.981                       | 1.002                          | 1.159                                 |
|                 | p     | <0.001                                                    | 0.098                    | 0.386                                | 0.501         | <b>0.005</b>         | 0.284                     | 0.940                       | 0.877                          | 0.672                                 |
|                 | Model | X <sup>2</sup> (8)=21.640; p=0.006; R <sup>2</sup> =0.106 |                          |                                      |               |                      |                           |                             |                                |                                       |
| Ringling in the | B     | -3.318                                                    | 0.315                    | 0.292                                | -0.372        | -0.018               | 0.063                     | -0.155                      | <b>0.048</b>                   | <0.0001                               |
| ears            | SE    | 1.204                                                     | 0.358                    | 0.182                                | 0.342         | 0.144                | 0.192                     | 0.262                       | <b>0.015</b>                   | 0.316                                 |

|       | Constant                                                  | Psychiatric morbidity | Burnout (emotional exhaustion) | Job effort | Work-life balance | Coping: Self-blame | Coping: Substance use | Work experience (years) | Work place (hospital) <sup>a</sup> |
|-------|-----------------------------------------------------------|-----------------------|--------------------------------|------------|-------------------|--------------------|-----------------------|-------------------------|------------------------------------|
| OR    | 0.036                                                     | 1.370                 | 1.338                          | 0.689      | 0.983             | 1.065              | 0.857                 | <b>1.050</b>            | 1.000                              |
| p     | 0.006                                                     | 0.379                 | 0.109                          | 0.277      | 0.903             | 0.742              | 0.555                 | <b>0.002</b>            | 1.000                              |
| Model | X <sup>2</sup> (8)=16.817; p=0.032; R <sup>2</sup> =0.080 |                       |                                |            |                   |                    |                       |                         |                                    |

*Note.* <sup>a</sup> 1= Hospital (n=239); 0 = Other (n=175)

1  
2  
3  
4  
5  
6  
7  
8  
9  
10  
11  
12  
13  
14  
15  
16  
17  
18  
19  
20  
21  
22  
23  
24  
25  
26  
27  
28  
29  
30  
31  
32  
33  
34  
35  
36  
37  
38  
39  
40  
41  
42  
43  
44  
45  
46  
47  
48  
49  
50  
51  
52  
53  
54  
55  
56  
57  
58  
59  
60

For peer review only

STROBE Statement—Checklist of items that should be included in reports of *cross-sectional studies*

|                              | Item No | Recommendation                                                                                                                                                                       | Page number                                            |
|------------------------------|---------|--------------------------------------------------------------------------------------------------------------------------------------------------------------------------------------|--------------------------------------------------------|
| <b>Title and abstract</b>    | 1       | (a) Indicate the study's design with a commonly used term in the title or the abstract                                                                                               | 1-2                                                    |
|                              |         | (b) Provide in the abstract an informative and balanced summary of what was done and what was found                                                                                  | 2-3                                                    |
| <b>Introduction</b>          |         |                                                                                                                                                                                      |                                                        |
| Background/rationale         | 2       | Explain the scientific background and rationale for the investigation being reported                                                                                                 | 4-6                                                    |
| Objectives                   | 3       | State specific objectives, including any prespecified hypotheses                                                                                                                     | 6-7                                                    |
| <b>Methods</b>               |         |                                                                                                                                                                                      |                                                        |
| Study design                 | 4       | Present key elements of study design early in the paper                                                                                                                              | 7                                                      |
| Setting                      | 5       | Describe the setting, locations, and relevant dates, including periods of recruitment, exposure, follow-up, and data collection                                                      | 7                                                      |
| Participants                 | 6       | (a) Give the eligibility criteria, and the sources and methods of selection of participants                                                                                          | 7                                                      |
| Variables                    | 7       | Clearly define all outcomes, exposures, predictors, potential confounders, and effect modifiers. Give diagnostic criteria, if applicable                                             | 8-9                                                    |
| Data sources/<br>measurement | 8*      | For each variable of interest, give sources of data and details of methods of assessment (measurement). Describe comparability of assessment methods if there is more than one group | 8-9                                                    |
| Bias                         | 9       | Describe any efforts to address potential sources of bias                                                                                                                            | Not explained as was based on requirements for the RCT |
| Study size                   | 10      | Explain how the study size was arrived at                                                                                                                                            | Not explained as was based on requirements for the RCT |
| Quantitative variables       | 11      | Explain how quantitative variables were handled in the analyses. If applicable, describe which groupings were chosen and why                                                         | 9                                                      |
| Statistical methods          | 12      | (a) Describe all statistical methods, including those used to control for confounding                                                                                                | 9                                                      |
|                              |         | (b) Describe any methods used to examine subgroups and interactions                                                                                                                  | -                                                      |
|                              |         | (c) Explain how missing data were addressed                                                                                                                                          | -                                                      |
|                              |         | (d) If applicable, describe analytical methods taking account of sampling strategy                                                                                                   | -                                                      |
|                              |         | (e) Describe any sensitivity analyses                                                                                                                                                | -                                                      |
| <b>Results</b>               |         |                                                                                                                                                                                      |                                                        |
| Participants                 | 13*     | (a) Report numbers of individuals at each stage of study—eg                                                                                                                          | 9                                                      |



1  
2  
3  
4  
5  
6  
7  
8  
9  
10  
11  
12  
13  
14  
15  
16  
17  
18  
19  
20  
21  
22  
23  
24  
25  
26  
27  
28  
29  
30  
31  
32  
33  
34  
35  
36  
37  
38  
39  
40  
41  
42  
43  
44  
45  
46  
47  
48  
49  
50  
51  
52  
53  
54  
55  
56  
57  
58  
59  
60

numbers potentially eligible, examined for eligibility, confirmed eligible, included in the study, completing follow-up, and analysed

|                          |     |                                                                                                                                                                                                              |            |
|--------------------------|-----|--------------------------------------------------------------------------------------------------------------------------------------------------------------------------------------------------------------|------------|
|                          |     | (b) Give reasons for non-participation at each stage                                                                                                                                                         | -          |
|                          |     | (c) Consider use of a flow diagram                                                                                                                                                                           | -          |
| Descriptive data         | 14* | (a) Give characteristics of study participants (eg demographic, clinical, social) and information on exposures and potential confounders                                                                     | 9          |
|                          |     | (b) Indicate number of participants with missing data for each variable of interest                                                                                                                          | -          |
| Outcome data             | 15* | Report numbers of outcome events or summary measures                                                                                                                                                         | 9; Table 1 |
| Main results             | 16  | (a) Give unadjusted estimates and, if applicable, confounder-adjusted estimates and their precision (eg, 95% confidence interval). Make clear which confounders were adjusted for and why they were included | 9-12       |
|                          |     | (b) Report category boundaries when continuous variables were categorized                                                                                                                                    | -          |
|                          |     | (c) If relevant, consider translating estimates of relative risk into absolute risk for a meaningful time period                                                                                             | -          |
| Other analyses           | 17  | Report other analyses done—eg analyses of subgroups and interactions, and sensitivity analyses                                                                                                               | -          |
| <b>Discussion</b>        |     |                                                                                                                                                                                                              |            |
| Key results              | 18  | Summarise key results with reference to study objectives                                                                                                                                                     | 13-15      |
| Limitations              | 19  | Discuss limitations of the study, taking into account sources of potential bias or imprecision. Discuss both direction and magnitude of any potential bias                                                   | 15         |
| Interpretation           | 20  | Give a cautious overall interpretation of results considering objectives, limitations, multiplicity of analyses, results from similar studies, and other relevant evidence                                   | 13-15      |
| Generalisability         | 21  | Discuss the generalisability (external validity) of the study results                                                                                                                                        | 16         |
| <b>Other information</b> |     |                                                                                                                                                                                                              |            |
| Funding                  | 22  | Give the source of funding and the role of the funders for the present study and, if applicable, for the original study on which the present article is based                                                | 16         |

\*Give information separately for exposed and unexposed groups.

**Note:** An Explanation and Elaboration article discusses each checklist item and gives methodological background and published examples of transparent reporting. The STROBE checklist is best used in conjunction with this article (freely available on the Web sites of PLoS Medicine at <http://www.plosmedicine.org/>, Annals of Internal Medicine at <http://www.annals.org/>, and Epidemiology at <http://www.epidem.com/>). Information on the STROBE Initiative is available at [www.strobe-statement.org](http://www.strobe-statement.org).

# BMJ Open

## Does occupational distress raise the risk of alcohol use, binge-eating, ill health and sleep problems among medical doctors? A UK cross-sectional study

|                                 |                                                                                                                                                                                |
|---------------------------------|--------------------------------------------------------------------------------------------------------------------------------------------------------------------------------|
| Journal:                        | <i>BMJ Open</i>                                                                                                                                                                |
| Manuscript ID                   | bmjopen-2018-027362.R1                                                                                                                                                         |
| Article Type:                   | Research                                                                                                                                                                       |
| Date Submitted by the Author:   | 27-Nov-2018                                                                                                                                                                    |
| Complete List of Authors:       | Medisauskaite, Asta; UCL, Research Department of Medical Education<br>Kamau, Caroline; Birkbeck, University of London, Department of Organizational Psychology                 |
| <b>Primary Subject Heading</b>: | Occupational and environmental medicine                                                                                                                                        |
| Secondary Subject Heading:      | Health services research, Mental health                                                                                                                                        |
| Keywords:                       | Health & safety < HEALTH SERVICES ADMINISTRATION & MANAGEMENT, MENTAL HEALTH, OCCUPATIONAL & INDUSTRIAL MEDICINE, Substance misuse < PSYCHIATRY, Eating disorders < PSYCHIATRY |
|                                 |                                                                                                                                                                                |

SCHOLARONE™  
Manuscripts

1  
2  
3 1 **Does occupational distress raise the risk of alcohol use, binge-eating, ill health and sleep**  
4  
5 2 **problems among medical doctors? A UK cross-sectional study**  
6  
7  
8 3  
9

10 4 Asta Medisaukaite, PhD<sup>1</sup> & Caroline Kamau, PhD<sup>2</sup>  
11

12 5 <sup>1</sup> Research Department of Medical Education, UCL Medical School Room, GF/644, Royal  
13 Free Hospital, NW3 2PF.  
14 6

15 7 <sup>2</sup> Birkbeck Centre for Medical Humanities, Birkbeck, University of London, Malet Street,  
16 London, WC1E 7HX.  
17 8  
18

19 9

20 10

21 11

22 12 *Corresponding author:* Asta Medisaukaite, Research Department of Medical Education,  
23 UCL Medical School Room GF/644, Royal Free Hospital, NW3 2PF. E-mail address:  
24 [a.medisaukaite@ucl.ac.uk](mailto:a.medisaukaite@ucl.ac.uk). Telephone number: +44 2031086654  
25 13  
26 14  
27

28 15

29 16  
30  
31  
32  
33  
34  
35  
36  
37  
38  
39  
40  
41  
42  
43  
44  
45  
46  
47  
48  
49  
50  
51  
52  
53  
54  
55  
56  
57  
58  
59  
60

## Abstract

**Objectives.** This study aims to assess the prevalence of health problems (e.g. insomnia, binge-eating, substance use, and ill health) among UK doctors and to investigate whether occupational distress increases the risk of health problems.

**Design.** This study reports the analysis of data collected at the baseline stage of a randomised controlled trial (protocol #NCT02838290).

**Setting.** Doctors were invited through medical Royal Colleges, the British Medical Association's research panel, and a random selection of NHS trusts across various UK regions.

**Participants:** 417 UK doctors with an equivalent split of gender (48% males) and seniority (49% consultants).

**Main Outcomes and Measures:** Outcomes were sleep problems (e.g. insomnia), alcohol/drug use (e.g. binge-drinking), ill health (e.g. backache) and binge-eating (e.g. uncontrollable eating). Predictor variables were occupational distress (psychiatric morbidity, burnout, job effort, work-life imbalance, coping with stress through self-blame or substances) and work factors (workplace and years practicing medicine).

**Results:** 44% of doctors binge-drank and 5% met the criteria for alcohol dependence; 24-29% experienced negative emotions after overeating and 8% had a binge-eating disorder; 20-61% had some type of sleep problem and 12% had severe/moderate insomnia; 69% had fatigue and 19-29% experienced other types of ill health problems. The results show that occupational distress and job factors increase the odds of doctors using substances, having sleep problems, presenting with frequent symptoms of ill health, and binge-eating. For example, burnout increased the risk of all types of sleep problems, e.g. difficulty falling/staying asleep, insomnia (OR $\geq$ 1.344;  $p \leq 0.036$ ). Even taking into consideration

1  
2  
3 1 whether or not a doctor works in a hospital, the risk of health problems still rises when  
4  
5 2 doctors have signs of occupational distress.

6  
7  
8 3 **Conclusion.** Early recognition of occupational distress can prevent health problems among  
9  
10 4 UK doctors and in turn an impact on the quality of care by reducing the need for sickness-  
11  
12 5 related absence.

### 6 **Strengths and limitations of this study**

- 7
- 8 • This is the first study to explore a wide range of health problems among UK doctors  
9 and to examine work-related risk factors;
  - 10 • The study was piloted by consulting doctors about the method before the study  
11 started;
  - 12 • This is a cross-sectional study and therefore it is not possible to draw conclusions  
13 about causation;
  - 14 • It was not possible to calculate the response rate because it was not clear if all NHS  
15 trusts and Royal Colleges who agreed to invite doctors to take part in this research did  
16 send out the invitations, and to how many doctors.
- 17

## Introduction

Distress suffered by doctors has significant consequences for patient care. A recent meta-analysis of 47 studies found that burned-out doctors were more likely to provide poor quality care because of reduced professionalism, and they were more likely to be associated with poor patient satisfaction and incidents that jeopardise patient safety.[1] There is a high prevalence of distress among doctors in the United Kingdom (UK), with a systematic review of 30 studies showing that 17% to 52% of doctors have psychiatric morbidity,[2] higher than the prevalence rate of 19% in the general population,[3] and 31% to 54% of doctors have a type of burnout called emotional exhaustion.[2] Little is known, however, about whether occupational distress raises the risk of health problems (e.g. insomnia, binge-drinking) that might compel doctors to be absent from work or take sick leave resulting in under-staffing and a risk to patient safety.

Occupational distress can be described as a syndrome comprising of burnout, depression, maladaptive coping strategies and other symptoms.[4] The potential implications for risks to patient safety due to sickness-absence makes it useful to investigate the impact of different types of occupational distress on the relative risk of: (a) behaviours that have an impact on doctors' health such as alcohol/drug use and binge-eating; (b) health issues such as sleep disturbances and daily or weekly symptoms of ill health (e.g. headaches or fatigue). This is the first study to examine such a broad spectrum of health consequences among doctors. The other innovation of the current study is that, whereas many previous studies have sampled US doctors [5] or individual specialties such as oncology [6] and surgery,[7] this study sheds new light on the impact of occupational distress on health problems among doctors in the UK.

*Does occupational distress increase the risk of doctors using alcohol or drugs?*

Workers experiencing occupational distress are more likely to regularly drink alcohol, binge-drink or use drugs as a method of coping.[8,9] Doctors, on average, report equivalent or lower rates of alcohol abuse than the general population [10] but daily alcohol consumption or binge-drinking that does not meet the threshold for diagnosis of alcoholism is still problematic,[11,12] and symptomatic of psychological distress. In the US, 10% of doctors drink alcohol daily and 8% report severe alcohol or drug misuse or dependence at some point in their lives.[5] Prescription drug abuse is particularly problematic because doctors are up to

1  
2  
3 1 5 times more likely to use prescription drugs than the general population due to easier access  
4  
5 2 or familiarity with prescription drugs, e.g. 24% of US doctors use benzodiazepine and 40%  
6  
7 3 use minor opiates.[5] There are many reasons why doctors use substances – not all of which  
8  
9 4 are to do with being distressed – therefore research is needed to clarify the proportion of  
10  
11 5 doctors who use alcohol/drugs as a way of coping with occupational distress. The coping  
12  
13 6 function of alcohol/drug use among doctors, as with the general population, is plausible  
14  
15 7 because alcohol and many drugs have psychoactive properties, e.g. prescription drugs such as  
16  
17 8 benzodiazepine and opiates; illicit drugs such as LSD. Occupational distress is known to  
18  
19 9 predict alcohol misuse in the general population [8] but little is known about whether, for  
20  
21 10 example, doctors with high levels of burnout are at greater risk of using alcohol or drugs  
22  
23 11 (including prescription or legally purchased drugs), and whether other types of occupational  
24  
25 12 distress (e.g. psychiatric morbidity, negative coping strategies) have similar effects. Little is  
26  
27 13 also known about the impact of other job factors such as work experience on the risk of  
28  
29 14 doctors engaging in substance use.

30  
31  
32  
33  
34  
35  
36  
37  
38  
39  
40  
41  
42  
43  
44  
45  
46  
47  
48  
49  
50  
51  
52  
53  
54 15 *Does occupational distress increase the risk of doctors' binge-eating?*

55  
56  
57  
58  
59  
60  
61  
62  
63  
64  
65  
66  
67  
68  
69  
70  
71  
72  
73  
74  
75  
76  
77  
78  
79  
80  
81  
82  
83  
84  
85  
86  
87  
88  
89  
90  
91  
92  
93  
94  
95  
96  
97  
98  
99  
100  
101  
102  
103  
104  
105  
106  
107  
108  
109  
110  
111  
112  
113  
114  
115  
116  
117  
118  
119  
120  
121  
122  
123  
124  
125  
126  
127  
128  
129  
130  
131  
132  
133  
134  
135  
136  
137  
138  
139  
140  
141  
142  
143  
144  
145  
146  
147  
148  
149  
150  
151  
152  
153  
154  
155  
156  
157  
158  
159  
160  
161  
162  
163  
164  
165  
166  
167  
168  
169  
170  
171  
172  
173  
174  
175  
176  
177  
178  
179  
180  
181  
182  
183  
184  
185  
186  
187  
188  
189  
190  
191  
192  
193  
194  
195  
196  
197  
198  
199  
200  
201  
202  
203  
204  
205  
206  
207  
208  
209  
210  
211  
212  
213  
214  
215  
216  
217  
218  
219  
220  
221  
222  
223  
224  
225  
226  
227  
228  
229  
230  
231  
232  
233  
234  
235  
236  
237  
238  
239  
240  
241  
242  
243  
244  
245  
246  
247  
248  
249  
250  
251  
252  
253  
254  
255  
256  
257  
258  
259  
260  
261  
262  
263  
264  
265  
266  
267  
268  
269  
270  
271  
272  
273  
274  
275  
276  
277  
278  
279  
280  
281  
282  
283  
284  
285  
286  
287  
288  
289  
290  
291  
292  
293  
294  
295  
296  
297  
298  
299  
300  
301  
302  
303  
304  
305  
306  
307  
308  
309  
310  
311  
312  
313  
314  
315  
316  
317  
318  
319  
320  
321  
322  
323  
324  
325  
326  
327  
328  
329  
330  
331  
332  
333  
334  
335  
336  
337  
338  
339  
340  
341  
342  
343  
344  
345  
346  
347  
348  
349  
350  
351  
352  
353  
354  
355  
356  
357  
358  
359  
360  
361  
362  
363  
364  
365  
366  
367  
368  
369  
370  
371  
372  
373  
374  
375  
376  
377  
378  
379  
380  
381  
382  
383  
384  
385  
386  
387  
388  
389  
390  
391  
392  
393  
394  
395  
396  
397  
398  
399  
400  
401  
402  
403  
404  
405  
406  
407  
408  
409  
410  
411  
412  
413  
414  
415  
416  
417  
418  
419  
420  
421  
422  
423  
424  
425  
426  
427  
428  
429  
430  
431  
432  
433  
434  
435  
436  
437  
438  
439  
440  
441  
442  
443  
444  
445  
446  
447  
448  
449  
450  
451  
452  
453  
454  
455  
456  
457  
458  
459  
460  
461  
462  
463  
464  
465  
466  
467  
468  
469  
470  
471  
472  
473  
474  
475  
476  
477  
478  
479  
480  
481  
482  
483  
484  
485  
486  
487  
488  
489  
490  
491  
492  
493  
494  
495  
496  
497  
498  
499  
500  
501  
502  
503  
504  
505  
506  
507  
508  
509  
510  
511  
512  
513  
514  
515  
516  
517  
518  
519  
520  
521  
522  
523  
524  
525  
526  
527  
528  
529  
530  
531  
532  
533  
534  
535  
536  
537  
538  
539  
540  
541  
542  
543  
544  
545  
546  
547  
548  
549  
550  
551  
552  
553  
554  
555  
556  
557  
558  
559  
560  
561  
562  
563  
564  
565  
566  
567  
568  
569  
570  
571  
572  
573  
574  
575  
576  
577  
578  
579  
580  
581  
582  
583  
584  
585  
586  
587  
588  
589  
590  
591  
592  
593  
594  
595  
596  
597  
598  
599  
600  
601  
602  
603  
604  
605  
606  
607  
608  
609  
610  
611  
612  
613  
614  
615  
616  
617  
618  
619  
620  
621  
622  
623  
624  
625  
626  
627  
628  
629  
630  
631  
632  
633  
634  
635  
636  
637  
638  
639  
640  
641  
642  
643  
644  
645  
646  
647  
648  
649  
650  
651  
652  
653  
654  
655  
656  
657  
658  
659  
660  
661  
662  
663  
664  
665  
666  
667  
668  
669  
670  
671  
672  
673  
674  
675  
676  
677  
678  
679  
680  
681  
682  
683  
684  
685  
686  
687  
688  
689  
690  
691  
692  
693  
694  
695  
696  
697  
698  
699  
700  
701  
702  
703  
704  
705  
706  
707  
708  
709  
710  
711  
712  
713  
714  
715  
716  
717  
718  
719  
720  
721  
722  
723  
724  
725  
726  
727  
728  
729  
730  
731  
732  
733  
734  
735  
736  
737  
738  
739  
740  
741  
742  
743  
744  
745  
746  
747  
748  
749  
750  
751  
752  
753  
754  
755  
756  
757  
758  
759  
760  
761  
762  
763  
764  
765  
766  
767  
768  
769  
770  
771  
772  
773  
774  
775  
776  
777  
778  
779  
780  
781  
782  
783  
784  
785  
786  
787  
788  
789  
790  
791  
792  
793  
794  
795  
796  
797  
798  
799  
800  
801  
802  
803  
804  
805  
806  
807  
808  
809  
810  
811  
812  
813  
814  
815  
816  
817  
818  
819  
820  
821  
822  
823  
824  
825  
826  
827  
828  
829  
830  
831  
832  
833  
834  
835  
836  
837  
838  
839  
840  
841  
842  
843  
844  
845  
846  
847  
848  
849  
850  
851  
852  
853  
854  
855  
856  
857  
858  
859  
860  
861  
862  
863  
864  
865  
866  
867  
868  
869  
870  
871  
872  
873  
874  
875  
876  
877  
878  
879  
880  
881  
882  
883  
884  
885  
886  
887  
888  
889  
890  
891  
892  
893  
894  
895  
896  
897  
898  
899  
900  
901  
902  
903  
904  
905  
906  
907  
908  
909  
910  
911  
912  
913  
914  
915  
916  
917  
918  
919  
920  
921  
922  
923  
924  
925  
926  
927  
928  
929  
930  
931  
932  
933  
934  
935  
936  
937  
938  
939  
940  
941  
942  
943  
944  
945  
946  
947  
948  
949  
950  
951  
952  
953  
954  
955  
956  
957  
958  
959  
960  
961  
962  
963  
964  
965  
966  
967  
968  
969  
970  
971  
972  
973  
974  
975  
976  
977  
978  
979  
980  
981  
982  
983  
984  
985  
986  
987  
988  
989  
990  
991  
992  
993  
994  
995  
996  
997  
998  
999  
1000

16 Like alcohol or drug use, binge-eating is more prevalent among workers experiencing  
17 occupational distress [13] but, unlike substance use, little is known about binge-eating rates  
18 among doctors and risk factors. Binge-eating can be defined as eating a larger amount of food  
19 than most people eat in one sitting and finding oneself unable to control ones eating.[14]  
20 Binge-eating, like alcohol or drug use, is a common method of coping with psychological  
21 distress because eating offers an initial sense of comfort.[15,16] The initial comfort is,  
22 however, followed by feelings of shame or guilt, thus exacerbating distress.[16] This is one  
23 of the first studies to assess the prevalence of binge-eating among UK doctors and to offer  
24 insights into whether doctors who binge-eat experience unpleasant emotions after bingeing.  
25 This study will also offer new insights into the impact of different types of occupational  
26 distress (e.g. work-life imbalance) which, together with analysing substance abuse by  
27 doctors, will reveal the consequences of occupational distress for doctors' health-related  
28 behaviours.

29 *Does occupational distress increase the risk of doctors having sleep disturbances?*

30 There have been calls for research into the connection between sleep problems and doctors'  
31 health [17] but most previous studies have focused on sleep deprivation rather than sleep  
32 disturbances that have a psychological aetiology, e.g. trouble falling/staying asleep due to

1 worry. Sleep deprivation can be defined as the lack of the opportunity to sleep, or more  
2 simply as sleeping too few hours each day. Sleep deprivation is associated with  
3 depression,[18,19] burnout,[20] suicide risk,[19] and immunity or cardiovascular health  
4 problems [21] among doctors but sleep deprivation in itself is not necessarily a sign of  
5 psychological distress. Doctors who work long shifts [22] or lack block-scheduled shifts [23]  
6 sleep too few hours because they have no choice. Therefore, rather than measuring sleep  
7 deprivation, this study measured types of sleep disturbance with a psychological aetiology  
8 such as trouble falling asleep, waking up prematurely because of worrying about work, and  
9 insomnia. It is plausible that the risk of these types of sleep disturbance is higher among  
10 doctors suffering from work-life imbalance, psychiatric morbidity, and other types of  
11 occupational distress. This study will evaluate whether UK doctors suffering from  
12 occupational distress have an increased risk of sleep disturbances.

### 13 *Does occupational distress increase the risk of doctors presenting with ill health?*

14 There is some research about the physical health of doctors in some specialties (e.g.  
15 oncology)[6] but research is needed to assess whether occupational distress predicts the risk  
16 of doctors from various specialties suffering from daily or frequent headaches,  
17 gastrointestinal problems, and other physical symptoms. Physical health has a complex range  
18 of causes (e.g. health behaviours, genetics and infections) but people who are distressed are  
19 more susceptible to infections because psychological distress weakens the immune  
20 system.[24] The important question, therefore, is the relative risk of ill health symptoms,  
21 comparing doctors with and without occupational distress. We recognise that the physical  
22 health of doctors is shaped by a complex range of factors – only one of which is occupational  
23 distress – because working in a clinical environment can pose some risk to physical  
24 health.[25] This study is one of the first to shed light on the impact of occupational distress  
25 on ill health symptoms among UK doctors.

### 26 *Study aims*

27 This study aims to assess whether doctors suffering from occupational distress have an  
28 increased risk of (i) using alcohol or drugs (illicit, non-illicit); (ii) binge-eating; (iii) having  
29 sleep disturbances; and (iv) presenting with physical health symptoms. This study will extend  
30 previous literature about occupational distress in medicine, which has focused on burnout and  
31 psychiatric morbidity,[2] by measuring and defining occupational distress in additional ways,  
32 e.g. work-life imbalance, job effort, coping with stress through self-blame or through



1  
2  
3 1 substance use, drawing on previous literature highlighting the multiple dimensions of  
4 2 occupational distress.[6] This study will also provide new insights into the prevalence of  
5 3 alcohol/drug use, binge-eating, sleep and ill health problems among UK doctors, extending  
6 4 previous research about doctors from other countries or individual specialties.[6,7]  
7  
8  
9

## 10 5 11 6 **Method**

### 12 7 13 8 *Patient and public involvement statement*

14 9 All questionnaires were valid, reliable measures selected from previous literature but it was  
15 10 important to consult doctors about whether the types of occupational distress and health  
16 11 problems to be measured were relevant to doctors, and whether the instructions were clear.  
17 12 We thus consulted 15 doctors before the main study, using online software (*Qualtrics*). The  
18 13 pilot study sought the doctors' feedback (through open ended questions) about the relevance  
19 14 and clarity of the questionnaires. Doctors gave generally positive feedback. Some minor  
20 15 amendments included revising the wording of demographic questions, questionnaire  
21 16 instructions and reducing the number of questionnaires to eliminate similar measures.  
22  
23  
24  
25  
26  
27  
28  
29  
30  
31  
32

### 33 17 34 18 *Study design*

35 19 The research reported in this article is an analysis of data collected at the baseline stage of a  
36 20 randomised controlled trial (protocol #NCT02838290) of the effect of an intervention on  
37 21 doctors' levels of occupational distress and health problems. The trial took place from July to  
38 22 November 2016. Due to the complexity of the trial this paper reports a cross-sectional  
39 23 analysis of the baseline data.  
40  
41  
42  
43  
44

### 45 24 46 25 *Participants and study size*

47 26 Doctors took part in this study online (*Qualtrics*). They learnt about the study through  
48 27 medical Royal Colleges, NHS trusts, and the British Medical Association (BMA). To prevent  
49 28 selection bias based on specialty, we invited all Royal Colleges from which 9 agreed to  
50 29 distribute information about the research to their members. To prevent selection bias due to  
51 30 an NHS trust's reputation we randomly selected 25% NHS trusts. From the ones possible to  
52 31 reach, 9 distributed invitations to this study. The third source of data was the BMA's research  
53 32 panel. The majority of UK medical doctors are members of the BMA and any of them can  
54 33 join the BMA's research panel; therefore, this panel represented a broad spectrum of doctors.  
55 34 All medical doctors working in the UK were included in the baseline data analysis.  
56  
57  
58  
59  
60

## 1 *Measures*

2 *Outcome measures:* Doctors completed a variety of questionnaires assessing health problems.  
3 In some cases, we analysed responses to individual items in addition to the average of whole  
4 questionnaires because this offered richer insights into the prevalence of certain types of  
5 substance misuse (e.g. binge-drinking), different symptoms of ill health (e.g. backache),  
6 different signs of binge-eating (e.g. uncontrollable eating) and sleep disturbances (e.g. trouble  
7 falling asleep). This also enabled a better understanding of what aspects of health problems  
8 are predicted by occupational distress.

- 9 1. *Alcohol and drug use:* Alcohol dependence was assessed with the Patient Health  
10 Questionnaire [26] and the alcohol use habits with 3 items from the Alcohol Use  
11 Disorder Identification Scale (AUDIT).[27] Two items from the Brief COPE  
12 questionnaire [28] evaluated doctors' tendency to use substances as a stress coping  
13 strategy. Drug use list of 22 illicit and legal drugs was devised from the Commonly  
14 Abused Drugs Charts [29] and the UK drug misuse declaration.[30]
- 15 2. *Binge-eating habits:* These were measured using the binge-eating disorder items from  
16 the Eating Disorder Diagnostic Scale (as a scale and separate items).[31]
- 17 3. *Sleep disturbances:* Insomnia was measured with the Insomnia Severity Index (ISI;  
18 Cronbach  $\alpha=0.891$ ).[32] Sleep problems were items derived from the Effort-Reward  
19 scale [33] and ISI.[32]
- 20 4. *Ill health symptoms:* The Physical Symptom Inventory [34] comprising 12 items was  
21 used to assess the frequency with which doctors experienced various symptoms.

22  
23 *Predictor measures:* The predictor variables and measuring instruments captured different  
24 types of occupational distress and job factors:

- 25  
26 1. *Psychiatric morbidity:* This was measured using the General Health Questionnaire-12  
27 (GHQ-12; Cronbach  $\alpha=0.927$ ).[35] This measure of psychiatric morbidity was chosen  
28 instead of others (e.g. Patient Health Questionnaire) because GHQ-12 was previously  
29 extensively used to examine working populations (e.g.[3]), including doctors (e.g.[6]).
- 30 2. *Burnout:* Emotional exhaustion from the Maslach Burnout Inventory (MBI) [36] was  
31 assessed in this study (Cronbach  $\alpha=0.905$ ). Emotional exhaustion was selected  
32 because previous research shows that it is the best predictor of stress-related health  
33 among the three dimensions.[37]

- 1 3. *Job effort*: The Job Effort scale from the Effort-Reward scale [33] measured time  
2 pressure, interruptions and demands at work (Cronbach  $\alpha=0.770$ ).
- 3 4. *Work-life imbalance*: This was measured using the Work-Family Conflict scale [38]  
4 (Cronbach  $\alpha=0.934$ ).
- 5 5. *Maladaptive coping strategies*: Two scales from the Brief COPE questionnaire [28]  
6 were used: coping through substance use (Cronbach  $\alpha=0.872$ ), and coping through  
7 self-blame (Cronbach  $\alpha=0.783$ ).
- 8 6. *Work experience*: years working in medicine.
- 9 7. *Work place type*: doctors indicated whether they work in a hospital or other setting.

10  
11 More information about the measures is presented in Table 1.

12  
13 [Insert Table 1]

### 14 15 *Statistical methods*

16 Outcome variables were re-coded into binary variables in order to distinguish between the  
17 presence and absence of a health problem and to identify factors that raise the risk of the  
18 symptom being present. The cut-off points where possible were identified from the literature  
19 (see citations within Table 1). For sleep problems, we determined the cut-off points based on  
20 the guidance for the ISI.[32] For each item doctors reporting moderate or severe sleep  
21 problems were noted as having the symptom present, and reporting no/mild sleep problems  
22 were noted as having the symptom absent. Doctors' responses about using substances to cope  
23 with stress were dichotomised as either not doing so, or using substances a little bit, to a  
24 medium extent or a lot. Frequency of drinking was divided into drinking alcohol less than 2-3  
25 times a week and more than 2-3 times a week. Ill health symptoms were recoded such that the  
26 presence of each symptom meant experiencing once/twice per week or more often. See Table  
27 1 for more details. Logistic regression tested the impact of predictors on the odds of the  
28 outcomes using SPSS v21 software.

## 29 30 **Results**

31  
32 In total, 417 UK doctors participated. The mean age was 47.23 years (SD=10.97), and there  
33 was an equivalent split of gender (48% males) and seniority (49% consultants). We compared  
34 demographic characteristics of doctors in this study to doctors on the List of Registered

1 Medical Practitioners (LRPM)[39,40] and the comparison showed that the current sample  
2 largely mirrors the demographics of UK medical doctors in terms of the proportion of doctors  
3 by gender, age, grade and specialty, except that there was a higher representation of  
4 consultants and public health doctors than the proportions within the LRPM (Table 2).

5  
6 Table 1 shows the prevalence and descriptive statistics of different types of occupational  
7 distress; for example, 32.7% of doctors had psychiatric morbidity and 55.3% were  
8 emotionally exhausted.

9  
10 [Insert Table 2]

11  
12 *How many doctors use alcohol or drugs?* Table 1 shows that 53% of doctors drank alcohol  
13  $\geq 2$  times a week, 27% consumed  $\geq 3$  drinks on a typical day of drinking and 44% binge-drank  
14 by consuming 6+ drinks on one occasion. 5% of doctors met the criteria for alcohol  
15 dependence but the rest of doctors did not report significant impairments in their occupational  
16 or other functioning as a result of drinking alcohol. In terms of illicit/non-illicit drug use,  
17 44% of doctors used some type of drugs but almost all were non-illicit drugs: 3% of doctors  
18 used prescription opioids, 2% used benzodiazepines, 5% used sleep medication, 5% smoked  
19 tobacco, 7% used herbal or homeopathic remedies and 35% used over-the-counter medicines.  
20 Illegal drug use was rare: only 1 doctor reported cocaine use and 1 doctor used amyl nitrite.  
21 No doctor reported using amphetamines, anabolic steroids, cannabis, ecstasy, heroin,  
22 ketamine, khat, LSD, magic mushrooms, mephedrone, methadone, methamphetamine or  
23 tranquillizers.

24  
25 *Are distressed doctors more likely to use alcohol/drugs?* Coping with stress was the reason  
26 given by many doctors for drinking alcohol or taking drugs, with 34% saying that they used  
27 substances in order to feel better, and 22% used substances to help them get through stressful  
28 events. Table 3 shows logistic regression results analysing the effects of occupational distress  
29 and job factors on alcohol and drug use. The model significance testing shows that the  
30 predictors significantly explained variance in doctors using substances to help them get  
31 through something (6%), drinking alcohol frequently (38%) and large amounts (12%), binge-  
32 drinking (28%), and being alcohol dependent (28%). The predictors did not explain variance  
33 in drug use and doctors using substances to feel better ( $p > 0.05$ ). Doctors who coped with  
34 stress by using substances had a higher risk of frequent alcohol use, binge-drinking, alcohol

1 dependence and drug use ( $p \leq 0.022$ ). The results also show that having more experience  
2 working in medicine raised the risk of a doctor drinking alcohol frequently ( $OR = 1.036$ ;  
3  $p = 0.002$ ) but lowered the risk of binge-drinking ( $OR = 0.970$ ;  $p = 0.007$ ). Doctors who worked  
4 in a hospital were more likely to drink high amounts of alcohol on a typical day of drinking  
5 and to binge-drink ( $OR \geq 1.672$ ;  $p \leq 0.044$ ). Doctors who reacted to stress by blaming  
6 themselves were more likely to use substances to get through something ( $OR = 1.374$ ;  
7  $p = 0.039$ ). Burnout, work-life imbalance and job effort were not significant unique predictors  
8 of substance use although the combined models were significant. The exception was  
9 psychiatric morbidity which had a significant unique effect of decreasing the risk of doctors  
10 drinking alcohol frequently ( $OR = 0.478$ ;  $p = 0.019$ ).

11  
12 [Insert Table 3]

13  
14 *How many doctors binge-eat?* Table 1 shows that 35% of doctors ate a large amount of food  
15 when they were not physically hungry, 31% ate until they felt uncomfortably full, and 24-  
16 29% of doctors experienced negative emotions after overeating such as embarrassment,  
17 disgust, depression or guilt. We found that 8% of doctors had a binge-eating disorder.

18  
19 *Are distressed doctors more likely to binge-eat?* Table 4 shows that all models tested were  
20 statistically significant and the predictors explained 8.1-17.1% of variance in binge-eating  
21 habits ( $p < 0.05$ ). Types of occupational distress that, individually, significantly predicted  
22 binge-eating habits were: self-blaming, work-life imbalance, and burnout. More experienced  
23 doctors were less likely to feel disgusted with themselves after binge-eating ( $OR = 0.966$ ;  
24  $p = 0.009$ ), as were doctors who worked in hospitals ( $OR = 0.453$ ;  $p = 0.008$ ). Job effort lowered  
25 the risk of a binge-eating disorder ( $OR = 0.179$ ;  $p < 0.001$ ). Psychiatric morbidity, by itself, did  
26 not predict binge-eating, and nor did coping with stress through substance use ( $p > 0.05$ ).

27  
28 [Insert Table 4]

29  
30 *How many doctors have sleep disturbances?* Table 1 shows that 22% of doctors had  
31 difficulty falling asleep, 35% difficulty staying asleep, 44% were dissatisfied with their sleep  
32 pattern, 20% were worried or distressed about a current sleep problem, and 35% of doctors'  
33 sleep problems interfered with daily functioning. Thinking about work contributed to sleep  
34 problems; 61% of doctors thought about work when they went to bed and 49% had trouble

1 sleeping if they postponed something they were supposed to do that day. The ISI [32] showed  
2 that 12% of doctors had severe/moderate insomnia.

3  
4 *Are distressed doctors more likely to have sleep disturbances?* Logistic regression models  
5 predicting 7 signs of sleep problems and insomnia are presented in Table 5. All models were  
6 statistically significant explaining from 23.4% to 39.1% of variance, showing that  
7 occupational distress and job factors significantly predicted sleep disturbances among  
8 doctors. Doctors with psychiatric morbidity were more likely to have insomnia, difficulty  
9 falling/staying asleep, think about work when they went to bed, find that sleep problems  
10 interfered with their daily functioning ( $OR \geq 2.117$ ;  $p \leq 0.026$ ), and burnout increased the risk  
11 of all 7 sleep disturbances ( $OR \geq 1.344$ ;  $p \leq 0.036$ ). Other significant unique predictors of sleep  
12 problems among doctors were: maladaptive coping with stress, work-life imbalance, and  
13 working in a hospital ( $p \leq 0.030$ ).

14  
15 [Insert Table 5]

16  
17 *How many doctors suffer from daily or frequent ill health?* 69% of doctors had fatigue and  
18 between 19% and 29% frequently experienced other type of ill health problems, e.g. upset  
19 stomach, backache and headaches. Only 8% or fewer doctors reported frequent  
20 (daily/weekly) non-menstrual stomach cramps, constipation, appetite loss and dizziness,  
21 therefore these symptoms were not analysed using logistic regression.

22  
23 *Are distressed doctors more likely to have daily or frequent ill health?* Table 6 shows the  
24 logistic regression results that the odds of doctors suffering from frequent ill health are raised  
25 by occupational distress together with years practising medicine and working in a hospital.  
26 The predictors explained 8-35.2% of variance in doctors presenting with ill health symptoms;  
27 only the effects on back pain were non-significant ( $p = 0.083$ ). Several types of occupational  
28 distress had significant unique effects, meaning that they individually predicted doctors'  
29 health. For instance, burnout raised the odds of doctors suffering from fatigue ( $OR = 1.804$ ;  
30  $p < 0.001$ ); job effort raised the odds of headaches ( $OR = 1.905$ ;  $p = 0.030$ ); work-life imbalance  
31 raised the odds of diarrhoea ( $OR = 1.717$ ;  $p = 0.005$ ); and psychiatric morbidity raised the odds  
32 of doctors suffering from fatigue, upset stomach or nausea, headaches,  
33 acid/indigestion/heartburn, and eye strain ( $OR \geq 1.930$ ;  $p \leq 0.017$ ). Working in a hospital did  
34 not, by itself, predict doctors' presentation of ill health symptoms, and nor did using

1 substances to cope with stress ( $p>0.05$ ). More years of experience in medicine decreased the  
2 odds of doctors having fatigue, upset stomach or nausea and headaches ( $OR\geq 0.963$ ;  
3  $p\leq 0.024$ ), but more experienced doctors had increased odds of ear ringing ( $OR=1.050$ ;  
4  $p=0.002$ ).

5  
6 [Insert Table 6]

## 7 8 Discussion

### 9 10 *Prevalence of occupational distress and health problems among UK doctors*

11 This study shows the prevalence of occupational distress and health problems such as ill  
12 health symptoms, and health-related problems (e.g. substance use) among UK doctors. The  
13 results replicate a recent systematic review about the prevalence of burnout and psychiatric  
14 morbidity [2] by finding that 32.7% of UK doctors have psychiatric morbidity and 55.3% a  
15 type of burnout called emotional exhaustion while providing new evidence about the  
16 prevalence of types of problems that were unrepresented in previous literature. The results  
17 showed that 11% of doctors have insomnia; 20-61% experience various sleep problems; 5%  
18 are alcohol dependent; 27-53% drink in a hazardous way; 69% have fatigue; 4-33%  
19 experience other physical complaints; 8% have a binge-eating disorder; and 24-35%  
20 experience binge-eating symptoms. 44% of doctors use some type of drugs, but mostly over-  
21 the-counter medications (35%). Prescription drug use was rare (3% use opioids and 2% use  
22 benzodiazepines), suggesting that the proportion of doctors getting drug treatment for anxiety  
23 is lower than the proportion of doctors with anxiety (14.7%).[41] Compared to the general  
24 population more doctors have psychiatric morbidity (32.7% compared 19%),[3] burnout  
25 (55.3% compared to 24.8%),[42] and more doctors have physical complaints such as back  
26 pain (e.g. 34% compared to 8-28% in the general population).[43] However, fewer doctors  
27 have insomnia (11%) or are alcohol dependent (5%) compared to the general population  
28 whereby 37% have insomnia and 13.9-29.1% have alcohol use disorder.[44] The results from  
29 this study also revealed a higher prevalence of burnout than the National Trainee Survey  
30 (NTS) which reported that 23.8% of medical trainees have burnout [45] but this could be  
31 because the current study had a high representation of consultants (49%). The current study  
32 supports the recent BMA annual survey reporting that 61% of doctors feel that their stress  
33 levels have increased over the last year [46] by showing that a similar proportion of doctors  
34 (55.3%) have a type of burnout called emotional exhaustion.

1  
2  
3 1 *Occupational distress increases the odds of health problems among UK doctors*

4  
5 2 The results show that occupational distress increases the odds of doctors using substances,  
6  
7 3 having sleep disturbances, frequent symptoms of ill health, and binge-eating. Even taking  
8  
9 4 into consideration whether or not a doctor works in a hospital, the risk of health problems still  
10  
11 5 rises when doctors have signs of occupational distress such as burnout. Previous research  
12  
13 6 showed that distress,[8,47] coping strategies [48–50] and job factors [51–56] are associated  
14  
15 7 with health problems. This study replicates previous findings while demonstrating the  
16  
17 8 generalisability of the effects to a wider range of health issues among UK doctors from  
18  
19 9 various specialties:

20  
21 11 *Alcohol/drug use:* Distressed doctors are more likely to use alcohol, with 22-34% of  
22  
23 12 doctors reporting that they use substances to feel better or help them get through  
24  
25 13 stressful events. Doctors who cope with stress by using substances have a higher risk of  
26  
27 14 alcohol dependence, binge-drinking, drinking larger amounts of alcohol, and a higher  
28  
29 15 risk to a great extent of using alcohol more frequently. Doctors who react to stress by  
30  
31 16 blaming themselves are more likely to use substances to get through something. Having  
32  
33 17 more experience working in medicine makes a doctor more likely to drink alcohol  
34  
35 18 frequently but lowers the likelihood of binge-drinking. Doctors who work in a hospital  
36  
37 19 are more likely to drink high amounts of alcohol on a typical day of drinking and to  
38  
39 20 binge-drink. In understanding the effects of occupational distress on alcohol or drug  
40  
41 21 use, the results showed the usefulness of assessing the combined effects of different  
42  
43 22 types of occupational distress, but that, except for psychiatric morbidity, burnout, work-  
44  
45 23 life imbalance and job effort do not individually predict alcohol use. This suggests that  
46  
47 24 occupational distress is best understood as a syndrome when understanding its effect on  
48  
49 25 alcohol use. These findings extend previous studies which show that burnout,  
50  
51 26 depression and psychiatric morbidity individually predict using alcohol  
52  
53 27 dependence/abuse.[7,57] The results also show that – for UK doctors – occupational  
54  
55 28 distress as a syndrome has no significant effect on legal or illegal drug use. Only  
56  
57 29 doctors who cite substance use as a strategy that they use to cope with stress are  
58  
59 30 significantly more likely to use drugs – and most of these are prescription or over-the-  
60  
31 counter drugs.

32  
33 33 *Binge-eating:* The risks of doctors binge-eating and experiencing negative emotions  
34  
35 34 after over-eating are raised by occupational distress, e.g. burnout, coping with stress by



1  
2  
3 1 blaming oneself, and work-life imbalance. This supports previous studies showing that  
4 2 binge-eating is a method of coping with stress that offers people an initial sense of  
5 3 comfort.[15,16] Doctors who have longer experience working in medicine, and doctors  
6 4 who work in hospitals, are less likely to have unpleasant emotions after binge-eating,  
7 5 suggesting that community-based doctors are more at risk of finding that binge-eating  
8 6 makes them feel worse, rather than better. The amount of effort that a doctor puts into  
9 7 their job lowers the risk of their suffering from a binge-eating disorder. Psychiatric  
10 8 morbidity, by itself, did not predict binge-eating, and nor did coping with stress through  
11 9 substance use.

12 10  
13 11 *Sleep disturbances:* Occupational distress and job factors significantly predict sleep  
14 12 problems and insomnia among doctors, supporting the view of occupational distress as  
15 13 a syndrome, whilst also revealing that certain types of occupational distress can also,  
16 14 individually, predict sleep disturbances. Previous research show that physicians with  
17 15 high burnout, for example, are more likely to experience sleep related problems.[58]  
18 16 This study extends our understanding of the risk factors and shows that burnout,  
19 17 psychiatric morbidity, maladaptive coping strategies, work-life imbalance, and working  
20 18 in a hospital increase the risk of sleep disturbances. This means that the risk of sleep  
21 19 problems or insomnia exists even if doctors are suffering from just one of these types of  
22 20 occupational distress which is in particularly noticeable with the increase in psychiatric  
23 21 morbidity. The sleep problems include trouble falling/staying sleep, worrying about  
24 22 work when trying to sleep, and finding that sleep problems interfere with daily  
25 23 functioning.

26 24  
27 25 *Daily or frequent ill health:* Occupational distress increases the odds of doctors  
28 26 suffering from fatigue, upset stomach or nausea, headaches, acid/indigestion or  
29 27 heartburn, eye strain, diarrhoea, and ringing in the ears but not back pain. Psychiatric  
30 28 morbidity, burnout, coping with stress by blaming oneself, job effort, and work-life  
31 29 imbalance each, as individual predictors, also raise the odds of doctors suffering from  
32 30 frequent ill health. These findings extend previous studies which investigate how the  
33 31 working conditions experienced by doctors relate to ill health [25] by showing that  
34 32 occupational distress, especially psychiatric morbidity, increases the risk of physical  
35 33 health problems. Doctors who work in a hospital do not have increased odds of ill  
36 34 health symptoms, and nor do doctors who use substances to cope with stress. More

1 experienced doctors have lower odds of fatigue, upset stomach or nausea and  
2 headaches, but are at a greater risk of suffering from ringing ears.

### 3 4 *Strengths and weaknesses of the study and future research*

5 This study is the first to explore the impact of occupational distress and work factors on the  
6 risk of health problems among UK doctors from various specialties. An additional strength of  
7 this study is that it is part of a bigger study using “a gold standard” design (a randomised  
8 controlled trial) and it was piloted by consulting doctors to ensure that the types of  
9 occupational distress and health problems measured were relevant. A weakness of this study  
10 is a cross-sectional analysis. We need future experimental research to test causation between  
11 occupational distress and health problems using a longitudinal design. We also encourage  
12 future research to measure hypotheses not possible to test within the current study, e.g.  
13 whether the risk of gastrointestinal problems among doctors rises with patient caseload or  
14 infection exposure.

15  
16 It was not possible to calculate the response rate because it was not clear whether all NHS  
17 trusts and medical Royal Colleges who agreed to take part in this study actually distributed  
18 the invitation and to how many doctors. Future research should explore whether our findings  
19 replicate in a larger sample because the current sample size is relatively small, in comparison  
20 to the whole population of UK medical doctors. We are also mindful that some participants  
21 might not have been comfortable answering some sensitive questions (e.g. about illicit drug  
22 or alcohol use) but the risk of response bias was mitigated by allowing doctors to complete  
23 confidential self-reported questionnaires. This is a recognised methods of measuring health  
24 and health-related behaviours (e.g. alcohol intake [59]).

### 25 26 *The meaning of the study: possible implications for clinicians and policymakers*

27 Occupational distress among doctors has a detrimental effect on the quality of care and  
28 patient safety.[1] This study has revealed that occupational distress also increases the risk of  
29 doctors suffering from health problems. The impact of occupational distress on ill health  
30 could increase levels of sickness-absence among doctors, thus reducing patient safety because  
31 of under-staffing. Likewise, the impact of occupational distress on substance use and sleep  
32 problems could mean that distress indirectly impairs doctors’ fitness to practice, judgement or  
33 decision-making because of being intoxicated, hung-over or having disturbed sleep.  
34 Therefore, we recommend that doctors’ mentors, supervisors, peers and occupational health

1 support services recognise and act upon (1) the prevalence of occupational distress and health  
2 problems among doctors; (2) the possibility that occupational distress raises the risk of  
3 several health problems; and (3) the need to provide early interventions that prevent doctors  
4 who are experiencing occupational distress from suffering the long-term health effects of  
5 sleep disturbances, frequent symptoms of ill health, and adopting negative health behaviours,  
6 such as binge-drinking or eating in order to cope.

#### 7 *Acknowledgements*

8 We are extremely grateful to all the doctors who kindly agreed to take part in this study and  
9 the organisations who helped us to reach their doctors.

#### 10 *Ethical approval and consent to participate*

11 The BEI School Ethics Committee at Birkbeck, University of London, approved the study in  
12 May 2016. Participants voluntarily consented to take part in this study.

#### 13 *Competing interests*

14 The authors declare that they have no competing interests.

#### 15 *Funding*

16 Not applicable

#### 17 *Authors' contributions*

18 AM and CK participated in the conception and design of the study. AM collected and  
19 analysed data. AM and CK were involved in the interpretation of the data and preparation of  
20 this article. Both authors read and approved the final manuscript.

#### 21 *Data sharing*

22 No additional data available

#### 23 **References**

- 24 1 Panagioti M, Geraghty K, Johnson J, *et al.* Association between physician burnout and  
25 patient safety, professionalism, and patient satisfaction: A systematic review and meta-  
26 analysis. *JAMA Intern Med* 2018;**178**:1317–30. doi:10.1001/jamainternmed.2018.3713
- 27 2 Imo UO. Burnout and psychiatric morbidity among doctors in the UK: a systematic

- 1  
2  
3 1 literature review of prevalence and associated factors. *BJPsych Bull* Published Online  
4 2 First: 2017. doi:10.1192/pb.bp.116.054247
- 5  
6 3 3 Goodwin L, Ben-Zion I, Fear NT, *et al.* Are reports of psychological stress higher in  
7 4 occupational studies? A systematic review across occupational and population based  
8 5 studies. *PLoS One* 2013;**8**. doi:10.1371/journal.pone.0078693
- 9  
10 6 4 Medisauskaite A, Kamau C. Prevalence of oncologists in distress: Systematic review  
11 7 and meta-analysis. *Psychooncology* 2017;**26**:1732–40. doi:10.1002/pon.4382
- 12  
13 8 5 Hughes, H. P, Brandenburg, C. N, Baldwin, L. D, *et al.* Prevalence of Substance Use  
14 9 Among US Physicians. *JAMA* 1992;**47**:771–3.
- 15  
16 10 6 Medisauskaite A, Kamau C. Prevalence of oncologists in distress: Systematic review  
17 11 and meta-analysis. *Psychooncology* Published Online First: 2017.  
18 12 doi:10.1002/pon.4382
- 19  
20 13 7 Oreskovich MR, Kaups KL, Balch CM, *et al.* Prevalence of Alcohol Use Disorders  
21 14 Among American Surgeons. *Arch Surg* 2012;**147**:168.  
22 15 doi:10.1001/archsurg.2011.1481
- 23  
24 16 8 Ahola K, Honkonen T, Pirkola S, *et al.* Alcohol dependence in relation to burnout  
25 17 among the Finnish working population. *Addiction* 2006;**101**:1438–43.  
26 18 doi:10.1111/j.1360-0443.2006.01539.x
- 27  
28 19 9 Leiter MP, Hakanen JJ, Ahola K, *et al.* Organizational predictors and health  
29 20 consequences of changes in burnout: A 12-year cohort study. *J Organ Behav*  
30 21 2012;**n/a-n/a**. doi:10.1002/job.1830
- 31  
32 22 10 Merlo LJ, Gold MS. Prescription opioid abuse and dependence among physicians:  
33 23 Hypotheses and treatment. *Harv Rev Psychiatry* 2008;**16**:181–94.  
34 24 doi:10.1080/10673220802160316
- 35  
36 25 11 NHS. Alcohol misuse - NHS. <https://www.nhs.uk/conditions/alcohol-misuse/>  
37 26 (accessed 26 Sep 2018).
- 38  
39 27 12 NHS. Binge drinking - NHS. [https://www.nhs.uk/live-well/alcohol-support/binge-](https://www.nhs.uk/live-well/alcohol-support/binge-drinking-effects/)  
40 28 [drinking-effects/](https://www.nhs.uk/live-well/alcohol-support/binge-drinking-effects/) (accessed 26 Sep 2018).
- 41  
42 29 13 Pena Gralle APB, Barbosa Moreno A, Lopes Juvanhol L, *et al.* Job strain and binge  
43 30 eating among Brazilian workers participating in the ELSA-Brasil study: does BMI  
44 31 matter? *J Occup Health* 2017;**59**:247–55. doi:10.1539/joh.16-0157-OA
- 45  
46 32 14 Waller D. Binge eating. *BMJ* 2001;**322**:343. doi:10.1136/BMJ.322.7282.343
- 47  
48 33 15 Macht M, Simons G. Emotions and eating in everyday life. *Appetite* 2000;**35**:65–71.  
49 34 doi:10.1006/appe.2000.0325
- 50  
51 35 16 McManus F, Waller Gi. A functional analysis of binge-eating. *Clin Psychol Rev*  
52 36 1995;**15**:845–63. doi:10.1016/0272-7358(95)00042-9
- 53  
54 37 17 Kamau C. Safe working hours protect doctors from sleep deprivation. *BMJ rapid*  
55 38 *response* 2017;**j4547**. doi:10.1136/bmj.j4547
- 56  
57  
58  
59  
60

- 1  
2  
3 1 18 Kalmbach DA, Arnedt JT, Song PX, *et al.* Sleep Disturbance and Short Sleep as Risk  
4 2 Factors for Depression and Perceived Medical Errors in First-Year Residents. *Sleep*  
5 3 2017;**40**. doi:10.1093/sleep/zsw073  
6  
7 4 19 Eddy R. Sleep deprivation among physicians. *B C Med J* 2005;**47**:176–80.  
8  
9 5 20 Aldrees TM, Aleissa S, Zamakhshary M, *et al.* Physician well-being: Prevalence of  
10 6 burnout and associated risk factors in a tertiary hospital, Riyadh, Saudi Arabia. *Ann*  
11 7 *Saudi Med* 2013;**33**:451–6. doi:10.5144/0256-4947.2013.451  
12  
13 8 21 Tobaldini E, Cogliati C, Fiorelli EM, *et al.* One night on-call: Sleep deprivation affects  
14 9 cardiac autonomic control and inflammation in physicians. *Eur J Intern Med*  
15 10 2013;**24**:664–70. doi:10.1016/j.ejim.2013.03.011  
16  
17 11 22 Anderson C, Sullivan JP, Flynn-Evans EE, *et al.* Deterioration of Neurobehavioral  
18 12 Performance in Resident Physicians During Repeated Exposure to Extended Duration  
19 13 Work Shifts. *Sleep* 2012;**35**:1137–46. doi:10.5665/sleep.2004  
20  
21 14 23 Bordley J, Agustin AG, Ahmed MA, *et al.* Restoration of resident sleep and wellness  
22 15 with block scheduling. *Med Educ* 2017;**51**:1241–9. doi:10.1111/medu.13392  
23  
24 16 24 Cohen S, Williamson GM. Stress and infectious disease in humans. *Psychol Bull*  
25 17 1991;**109**:5–24. doi:10.1037//0033-2909.109.1.5  
26  
27 18 25 Vijendren A, Yung M, Sanchez J. Occupational health issues amongst UK doctors: A  
28 19 literature review. *Occup Med (Chic Ill)* 2015;**65**:519–28. doi:10.1093/occmed/kqv088  
29  
30 20 26 Spitzer RL, Williams JBW, Kroenke K, *et al.* Validity and utility of the PRIME-MD  
31 21 Patient Health Questionnaire in assessment of 3000 obstetric-gynecologic patients:  
32 22 The PRIME-MD Patient Health Questionnaire Obstetrics-Gynecology Study. *Am J*  
33 23 *Obstet Gynecol* 2000;**183**:759–69. doi:10.1067/mob.2000.106580  
34  
35 24 27 Babor TF, Higgins-Biddle JC, Saunders JB, *et al.* The Alcohol Use Disorders  
36 25 Identification Test Guidelines for Use in Primary Care. *World Heal Organ* 2001;;pp1-  
37 26 40. doi:10.1177/0269881110393051  
38  
39 27 28 Carver CS. You want to measure coping but your protocol's too long: Consider the  
40 28 Brief COPE. *Int. J. Behav. Med.* 1997;**4**:92–100. doi:10.1207/s15327558ijbm0401\_6  
41  
42 29 29 National Institute on Drug Abuse (NIDA). Commonly Abused Drugs Charts.  
43 30 2016.<https://www.drugabuse.gov/drugs-abuse/commonly-abused-drugs-charts>  
44 31 (accessed 16 Jan 2016).  
45  
46 32 30 Office for National Statistics. User Guide to Drug Misuse Statistics Contents. 2015.  
47  
48 33 31 Stice E, Telch CF, Rizvi SL. Development and validation of the Eating Disorder  
49 34 Diagnostic Scale: a brief self-report measure of anorexia, bulimia, and binge-eating  
50 35 disorder. *Psychol Assess* 2000;**12**:123–31. doi:10.1037/1040-3590.12.2.123  
51  
52 36 32 Bastien CH, Vallières A, Morin CM. Validation of the insomnia severity index as an  
53 37 outcome measure for insomnia research. *Sleep Med* 2001;**2**:297–307.  
54 38 doi:10.1016/S1389-9457(00)00065-4  
55  
56 39 33 Siegrist J, Li J, Montano D. Psychometric properties of the effort-reward imbalance  
57  
58  
59  
60

- 1  
2  
3 1 questionnaire. Germany: 2014. [http://www.uniklinik-duesseldorf.de/fileadmin/Datenpool/einrichtungen/institut\\_fuer\\_medizinische\\_soziologie\\_id54/ERI/Psychometrie.pdf](http://www.uniklinik-duesseldorf.de/fileadmin/Datenpool/einrichtungen/institut_fuer_medizinische_soziologie_id54/ERI/Psychometrie.pdf)
- 4 2  
5 3  
6 4  
7 34 Spector PE, Jex SM. Development of Four Self-Report Measures of Job Stressors and Strain: Interpersonal Conflict at Work Scale, Organizational Constraints Scale, Quantitative Workload Inventory, and Physical Symptoms Inventory. *J Occup Health Psychol* 1998;**3**:356–67.
- 8 4  
9 5  
10 6  
11 7  
12 8  
13 35 Goldberg DP, Hillier VF. A scaled version of the General Health Questionnaire. *Psychol Med* 1979;**9**:139–45. doi:10.1017/S0033291700021644
- 14 9  
15 10  
16 36 Maslach C, Jackson S. The measurement of experienced Burnout. *J Occup Behav* 1981;**2**:99–113. doi:10.1002/job.4030020205
- 17 11  
18 12  
19 37 Maslach C, Leiter MP. Understanding the burnout experience: recent research and its implications for psychiatry. *World Psychiatry* 2016;**15**:103–11. doi:10.1002/wps.20311
- 20 13  
21 14  
22 15  
23 38 Netemeyer RG, Boles JS, McMurrian R. Development and Validation of Work-Family Conflict and Family-Work Conflict Scales. *J Appl Psychol* 1996;**81**:400–10.
- 24 16  
25 17  
26 39 General Medical Council. *The state of medical education and practice in the UK*. 2017. doi:10.1017/CBO9781107415324.004
- 27 18  
28 19  
29 40 General Medical Council. Data Explorer. <https://data.gmc-uk.org/gmcdata/home/#/reports> (accessed 24 Nov 2018).
- 30 20  
31 21  
32 41 Johansson R, Carlbring P, Heedman Åsa, *et al.* Depression, anxiety and their comorbidity in the Swedish general population: point prevalence and the effect on health-related quality of life. *PeerJ* 2013;**1**:e98. doi:10.7717/peerj.98
- 33 22  
34 23  
35 24  
36 42 Shanafelt TD, Hasan O, Dyrbye LN, *et al.* Changes in Burnout and Satisfaction with Work-Life Balance in Physicians and the General US Working Population between 2011 and 2014. *Mayo Clin Proc* 2015;**90**:1600–13. doi:10.1016/j.mayocp.2015.08.023
- 37 25  
38 26  
39 27  
40 43 Health & Safety Executive. The role of work stress and psychological factors in the development of musculoskeletal disorders. 2004. <http://www.hse.gov.uk/research/rrpdf/rr273.pdf> (accessed 5 May 2018).
- 41 28  
42 29  
43 30  
44 44 Grant BF, Goldstein RB, Saha TD, *et al.* Epidemiology of DSM-5 Alcohol Use Disorder. *JAMA Psychiatry* 2015;**72**:757. doi:10.1001/jamapsychiatry.2015.0584
- 45 31  
46 32  
47 45 General Medical Council. National training surveys 2018: Initial findings report. 2018;:1–16. [https://www.gmc-uk.org/-/media/documents/dc11391-nts-2018-initial-findings-report\\_pdf-75268532.pdf](https://www.gmc-uk.org/-/media/documents/dc11391-nts-2018-initial-findings-report_pdf-75268532.pdf)
- 48 33  
49 34  
50 35  
51 46 BMA. BMA quarterly tracker survey. *BMA Surv* Published Online First: 2017. <http://bma.org.uk/working-for-change/policy-and-lobbying/training-and-workforce/tracker-survey/omnibus-august-survey-2014>
- 52 36  
53 37  
54 38  
55 47 Davey MM, Cummings G, Newburn-Cook C V., *et al.* Predictors of nurse absenteeism in hospitals: A systematic review. *J Nurs Manag* 2009;**17**:312–30. doi:10.1111/j.1365-2834.2008.00958.x
- 56 39  
57 40  
58  
59  
60

- 1  
2  
3 1 48 Kataoka M, Ozawa K, Tomotake M, *et al.* Occupational stress and its related factors  
4 2 among university teachers in Japan. *Health (Irvine Calif)* 2014;**06**:299–305.  
5 3 doi:10.4236/health.2014.65043  
6  
7 4 49 Litman JA. The COPE inventory: Dimensionality and relationships with approach- and  
8 5 avoidance-motives and positive and negative traits. *Pers Individ Dif* 2006;**41**:273–84.  
9 6 doi:10.1016/j.paid.2005.11.032  
10  
11 7 50 Mark G, Smith AP. Occupational stress, job characteristics, coping, and the mental  
12 8 health of nurses. *Br J Health Psychol* 2012;**17**:505–21. doi:10.1111/j.2044-  
13 9 8287.2011.02051.x  
14  
15 10 51 Khan A, Teoh KR, Islam S, *et al.* Psychosocial work characteristics, burnout,  
16 11 psychological morbidity symptoms and early retirement intentions: a cross-sectional  
17 12 study of NHS consultants in the UK. *BMJ Open* 2018;**8**:e018720.  
18 13 doi:10.1136/bmjopen-2017-018720  
19  
20 14 52 Lee RT, Seo B, Hladkyj S, *et al.* Correlates of physician burnout across regions and  
21 15 specialties: a meta-analysis. *Hum Resour Health* 2013;**11**:48. doi:10.1186/1478-4491-  
22 16 11-48  
23  
24 17 53 Umene-nakano W, Kato TA, Kikuchi S, *et al.* Nationwide Survey of Work  
25 18 Environment, Work-Life Balance and Burnout among Psychiatrists in Japan. *PLoS*  
26 19 *One* 2013;**8**:1–8. doi:10.1371/journal.pone.0055189  
27  
28 20 54 Keller M, Bamberg E, Kersten M, *et al.* Instrument for stress-related job analysis for  
29 21 hospital physicians: validation of a short version. *J Occup Med Toxicol* 2013;**8**:10–20.  
30 22 doi:10.1186/1745-6673-8-10  
31  
32 23 55 Shirom A, Nirel N, Vinokur AD. Work hours and caseload as predictors of physician  
33 24 burnout: The Mediating Effects by Perceived Workload and by Autonomy. *Appl*  
34 25 *Psychol* 2010;**59**:539–65. doi:10.1111/j.1464-0597.2009.00411.x  
35  
36 26 56 Wen J, Cheng Y, Hu X, *et al.* Workload, burnout, and medical mistakes among  
37 27 physicians in China: A cross-sectional study. *Biosci Trends* 2016;**10**:27–33.  
38 28 doi:10.5582/bst.2015.01175  
39  
40 29 57 Taylor C, Graham J, Potts H, *et al.* Impact of hospital consultant's poor mental health  
41 30 on patient care. *Br J Psychiatry* 2007;**190**:268–9.  
42  
43 31 58 Vela-Bueno A, Moreno-Jiménez B, Rodríguez-Muñoz A, *et al.* Insomnia and sleep  
44 32 quality among primary care physicians with low and high burnout levels. *J Psychosom*  
45 33 *Res* 2008;**64**:435–42. doi:10.1016/j.jpsychores.2007.10.014  
46  
47 34 59 Glovannucci E, Colditz G, Stampfer MJ, *et al.* The Assessment of Alcohol  
48 35 Consumption by a Simple Self-administered Questionnaire. *Am J Epidemiol*  
49 36 1991;**133**:810–7. doi:10.1093/oxfordjournals.aje.a115960  
50  
51 37  
52  
53  
54  
55  
56  
57  
58  
59  
60

Table

**Table 1.** Description of measures

| Item                                                | N   | No of Items | % of doctors with present symptom/<br>M(SD) | Recoding (if applicable)                                                                                                  | Measure             | Measure/Original Scoring                                               |
|-----------------------------------------------------|-----|-------------|---------------------------------------------|---------------------------------------------------------------------------------------------------------------------------|---------------------|------------------------------------------------------------------------|
| <b>Sleep disturbances</b>                           |     |             |                                             |                                                                                                                           |                     |                                                                        |
| Difficulty falling asleep                           | 390 | 1           | 22%                                         |                                                                                                                           |                     |                                                                        |
| Difficulty staying asleep                           | 390 | 1           | 35%                                         |                                                                                                                           |                     |                                                                        |
| Sleep problems interfere with daily functioning     | 389 | 1           | 35%                                         | 0,1 – Symptom absent; 2,3,4 - Symptom present                                                                             | ISI                 | 0 (scores showing no insomnia) to 4 (showing severe insomnia)          |
| Worried or distressed about a current sleep problem | 390 | 1           | 20%                                         |                                                                                                                           |                     |                                                                        |
| Dissatisfied with sleep pattern                     | 390 | 1           | 44%                                         | 0,1,2 – Symptom absent ( <i>2 is included as it means “unsure”</i> ); 3,4 - Symptom present                               |                     |                                                                        |
| Think about work when they go to bed                | 417 | 1           | 61%                                         | 0,1 – Symptom absent; 2,3 - Symptom present                                                                               | Effort-Reward scale | 1 (strongly disagree) to 4 (strongly agree)                            |
| Trouble sleeping if they postpone tasks             | 416 | 1           | 49%                                         |                                                                                                                           |                     |                                                                        |
| Insomnia                                            | 390 | 7           | 11%                                         | ≤14 – Symptom absent ( <i>no, subthreshold insomnia</i> ); ≥15 – Symptom present ( <i>moderate, severe insomnia</i> )[32] | ISI                 | 7 items; 0 (scores showing no insomnia) to 4 (showing severe insomnia) |



1  
2  
3  
4  
5  
6  
7  
8  
9  
10  
11  
12  
13  
14  
15  
16  
17  
18  
19  
20  
21  
22  
23  
24  
25  
26  
27  
28  
29  
30  
31  
32  
33  
34  
35  
36  
37  
38  
39  
40  
41  
42  
43  
44  
45  
46

**Substance use**

|                                                 |     |    |     |                                                                                                            |                                  |                                                            |
|-------------------------------------------------|-----|----|-----|------------------------------------------------------------------------------------------------------------|----------------------------------|------------------------------------------------------------|
| Substance use in order to feel better           | 392 | 1  | 34% | 1 – Symptom absent; 2, 3, 4 - Symptom present                                                              | The Brief COPE                   | 1 (I usually don't do this) to 4 (I usually do this a lot) |
| Substance use in order to get through something | 393 | 1  | 22% |                                                                                                            |                                  |                                                            |
| Frequency of drinking alcohol                   | 386 | 1  | 53% | 1,2,3 – not drinking or drinking less than 2-3 times a week; 4,5 - drinking 2-3 times a week or more often |                                  |                                                            |
| Quantity of drinks on typical day of drinking   | 362 | 1  | 27% | 1 – drinking 1,2 drinks; 2, 3, 4, 5 – drinking 3 or more drinks                                            | AUDIT                            | 1 (never/1-2) to 5 (daily/more than 10)                    |
| Drink 6 or more drinks on one occasion          | 373 | 1  | 44% | 1 – never; 2, 3, 4, 5 – binge-drinking                                                                     |                                  |                                                            |
| Alcohol dependence                              | 377 | 5  | 5%  | Substance abuse was identified if any of the items were answered “yes” [26]                                | The Patient Health Questionnaire | 0 (no) and 1 (yes)                                         |
| Drug use                                        | 380 | 22 | 44% | Drug use was identified if any of the items were answered “yes”                                            | Commonly Abused Drugs            | 22 items; 0 (no) and 1 (yes)                               |

**Physical symptoms**

|                         |     |   |     |                                               |                                |                                 |
|-------------------------|-----|---|-----|-----------------------------------------------|--------------------------------|---------------------------------|
| Fatigue                 | 390 | 1 | 69% |                                               |                                |                                 |
| Upset stomach or nausea | 390 | 1 | 19% | 1,2 – Symptom absent; 3,4,5 - Symptom present | The Physical Symptom Inventory | 1 (not at all) to 5 (every day) |
| Backache                | 390 | 1 | 33% |                                               |                                |                                 |

|    |                                                                           |     |   |     |                                    |                                                                                  |
|----|---------------------------------------------------------------------------|-----|---|-----|------------------------------------|----------------------------------------------------------------------------------|
| 1  |                                                                           |     |   |     |                                    |                                                                                  |
| 2  |                                                                           |     |   |     |                                    |                                                                                  |
| 3  | Headaches                                                                 | 390 | 1 | 27% |                                    |                                                                                  |
| 4  | Acid indigestion or heartburn                                             | 390 | 1 | 23% |                                    |                                                                                  |
| 5  | Eye strain                                                                | 390 | 1 | 29% |                                    |                                                                                  |
| 6  | Diarrhoea                                                                 | 390 | 1 | 12% |                                    |                                                                                  |
| 7  | Ringling in the ears                                                      | 390 | 1 | 13% |                                    |                                                                                  |
| 8  | Stomach cramps                                                            | 389 | 1 | 8%  |                                    |                                                                                  |
| 9  | Constipation                                                              | 390 | 1 | 4%  |                                    |                                                                                  |
| 10 | Loss of appetite                                                          | 390 | 1 | 7%  |                                    |                                                                                  |
| 11 | Dizziness                                                                 | 390 | 1 | 8%  |                                    |                                                                                  |
| 12 |                                                                           |     |   |     |                                    |                                                                                  |
| 13 | <b>Eating problems</b>                                                    |     |   |     |                                    |                                                                                  |
| 14 |                                                                           |     |   |     |                                    |                                                                                  |
| 15 | Eating large amounts of food when not physically hungry                   | 316 | 1 | 35% |                                    |                                                                                  |
| 16 | Eat until feeling uncomfortably full                                      | 316 | 1 | 31% |                                    |                                                                                  |
| 17 | Eat alone because they feel embarrassed                                   | 315 | 1 | 24% |                                    |                                                                                  |
| 18 | Feel disgusted with themselves, depressed or very guilty after overeating | 316 | 1 | 28% | n/a                                | 0 (no) and 1 (yes)                                                               |
| 19 | Feel upset about their uncontrollable eating or weight gain               | 316 | 1 | 29% |                                    |                                                                                  |
| 20 |                                                                           |     |   |     |                                    |                                                                                  |
| 21 | Binge eating                                                              | 316 | 9 | 8%  | Please see [31] details for coding | The Binge Eating Scale<br>8 items - 0 (no) and 1 (yes); 1 question – 0 to 7 days |
| 22 |                                                                           |     |   |     |                                    |                                                                                  |
| 23 |                                                                           |     |   |     |                                    |                                                                                  |
| 24 |                                                                           |     |   |     |                                    |                                                                                  |
| 25 |                                                                           |     |   |     |                                    |                                                                                  |
| 26 |                                                                           |     |   |     |                                    |                                                                                  |
| 27 |                                                                           |     |   |     |                                    |                                                                                  |
| 28 |                                                                           |     |   |     |                                    |                                                                                  |
| 29 |                                                                           |     |   |     |                                    |                                                                                  |
| 30 |                                                                           |     |   |     |                                    |                                                                                  |
| 31 |                                                                           |     |   |     |                                    |                                                                                  |
| 32 |                                                                           |     |   |     |                                    |                                                                                  |
| 33 |                                                                           |     |   |     |                                    |                                                                                  |
| 34 |                                                                           |     |   |     |                                    |                                                                                  |
| 35 |                                                                           |     |   |     |                                    |                                                                                  |
| 36 |                                                                           |     |   |     |                                    |                                                                                  |
| 37 |                                                                           |     |   |     |                                    |                                                                                  |
| 38 |                                                                           |     |   |     |                                    |                                                                                  |
| 39 |                                                                           |     |   |     |                                    |                                                                                  |
| 40 |                                                                           |     |   |     |                                    |                                                                                  |
| 41 |                                                                           |     |   |     |                                    |                                                                                  |
| 42 |                                                                           |     |   |     |                                    |                                                                                  |
| 43 |                                                                           |     |   |     |                                    |                                                                                  |
| 44 |                                                                           |     |   |     |                                    |                                                                                  |
| 45 |                                                                           |     |   |     |                                    |                                                                                  |
| 46 |                                                                           |     |   |     |                                    |                                                                                  |

1  
2  
3  
4  
5  
6  
7  
8  
9  
10  
11  
12  
13  
14  
15  
16  
17  
18  
19  
20  
21  
22  
23  
24  
25  
26  
27  
28  
29  
30  
31  
32  
33  
34  
35  
36  
37  
38  
39  
40  
41  
42  
43  
44  
45  
46

**Predictor variables**

|                               |     |    |                           |                                                                                                      |                            |                                                                                          |
|-------------------------------|-----|----|---------------------------|------------------------------------------------------------------------------------------------------|----------------------------|------------------------------------------------------------------------------------------|
| Burnout: Emotional exhaustion | 406 | 8  | 55% (M = 3.16; SD = 1.34) | Recoded for prevalence: <27 – Symptom absent; ≥27 – Symptom present [36]                             | MBI                        | 9 items; 0 (never) to 6 (every day)                                                      |
| Psychiatric morbidity         | 393 | 12 | 33% (M = 2.19; SD = 0.55) | Recoded for prevalence: 0,1 into 0 and 2,3 into 2; & < 4 – Symptom absent; ≥4 – Symptom present [35] | GHQ-12                     | 12 items; 0 (better than usual/not at all) to 3 (much less than usual/much less capable) |
| Effort scale                  | 415 | 3  | M = 3.3 (SD = 0.6)        | n/a                                                                                                  | Effort-Reward scale        | 3 items; 1 (strongly disagree) to 4 (strongly agree)                                     |
| Work-family Imbalance         | 416 | 5  | M = 5.26 (SD = 1.38)      | n/a                                                                                                  | Work-Family Conflict scale | 5 items; 0 (strongly disagree) to 6 (strongly agree)                                     |
| Coping: Substance use         | 392 | 2  | M = 2.33 (SD = 0.88)      | n/a                                                                                                  | The Brief COPE             | 2 items; 1 (I usually don't do this) to 4 (I usually do this a lot)                      |
| Coping: Self-blame            | 393 | 2  | M = 1.37 (SD = 0.61)      | n/a                                                                                                  |                            |                                                                                          |

**Table 2.** Participants' sociodemographic characteristics

| Sociodemographic characteristics  |                                    | %(n) or<br>M(SD) | LRMP  |
|-----------------------------------|------------------------------------|------------------|-------|
| Gender (Male)                     |                                    | 48% (199)        | 54.5% |
| Age                               |                                    | 47.23 (10.97)    |       |
|                                   | Under 30                           | 7% (28)          | 13%   |
|                                   | 30-49                              | 46% (190)        | 59%   |
|                                   | Over 50                            | 48% (197)        | 28%   |
| Year of experience<br>in medicine |                                    | 22.94 (11.35)    | N/A   |
| Grade                             | Junior doctor                      | 20% (82)         | 21%   |
|                                   | General<br>practitioner            | 18% (75)         | 23%   |
|                                   | Consultant                         | 49% (203)        | 32%   |
|                                   | Other                              | 14% (57)         | 23%   |
| Workplace                         | Community                          | 5% (21)          |       |
|                                   | General practice                   | 15% (61)         |       |
|                                   | Hospital                           | 58% (239)        | N/A   |
|                                   | Multiple-places                    | 15% (61)         |       |
|                                   | Other                              | 8% (32)          |       |
| Specialty                         | General practice                   | 17% (71)         | 23%   |
|                                   | Public health                      | 12% (49)         | 0.4%  |
|                                   | Anaesthetics and<br>intensive care | 9% (39)          | 8%    |
|                                   | Paediatrics                        | 7% (27)          | 2%    |
|                                   | Emergency<br>medicine              | 6% (24)          | 1%    |
|                                   | Psychiatry                         | 6% (25)          | 3%    |
|                                   | Other                              | 44% (184)        |       |
| Working hours                     | ≤40                                | 34% (141)        | N/A   |
|                                   | 41-50                              | 41% (170)        |       |
|                                   | >50                                | 15% (104)        |       |

*Note.* LRMP – List of registered medical practitioners

Table 3. Logistic regression predicting substance use problems

|                                                 |       | Constant                                                  | Psychiatric morbidity | Burnout (emotional exhaustion) | Job effort | Work-life balance | Coping: Self-blame | Coping: Substance use | Work experience (years) | Work place (hospital) <sup>a</sup> |
|-------------------------------------------------|-------|-----------------------------------------------------------|-----------------------|--------------------------------|------------|-------------------|--------------------|-----------------------|-------------------------|------------------------------------|
| Substance use in order to feel better           | B     | -2.239                                                    | 0.304                 | 0.162                          | 0.096      | -0.083            | 0.092              | n/a                   | 0.011                   | 0.053                              |
|                                                 | SE    | 0.844                                                     | 0.258                 | 0.123                          | 0.237      | 0.100             | 0.135              | n/a                   | 0.010                   | 0.231                              |
|                                                 | OR    | 0.107                                                     | 1.355                 | 1.175                          | 1.101      | 0.921             | 1.097              | n/a                   | 1.011                   | 1.054                              |
|                                                 | p     | 0.008                                                     | 0.239                 | 0.190                          | 0.685      | 0.411             | 0.493              | n/a                   | 0.278                   | 0.819                              |
|                                                 | Model | X <sup>2</sup> (7)=10.96; p=0.140; R <sup>2</sup> =0.04   |                       |                                |            |                   |                    |                       |                         |                                    |
| Substance use in order to get through something | B     | -3.034                                                    | 0.423                 | 0.085                          | 0.202      | -0.179            | <b>0.318</b>       | n/a                   | 0.002                   | 0.005                              |
|                                                 | SE    | 0.963                                                     | 0.289                 | 0.142                          | 0.274      | 0.113             | <b>0.154</b>       | n/a                   | 0.012                   | 0.266                              |
|                                                 | OR    | 0.048                                                     | 1.527                 | 1.089                          | 1.224      | 0.836             | <b>1.374</b>       | n/a                   | 1.002                   | 1.005                              |
|                                                 | p     | 0.002                                                     | 0.143                 | 0.551                          | 0.461      | 0.113             | <b>0.039</b>       | n/a                   | 0.859                   | 0.986                              |
|                                                 | Model | X <sup>2</sup> (7)=14.76; p=0.039; R <sup>2</sup> =0.059  |                       |                                |            |                   |                    |                       |                         |                                    |
| Drinking alcohol 2-3 times a week or more often | B     | -2.297                                                    | <b>-0.739</b>         | 0.203                          | -0.360     | 0.086             | -0.183             | <b>2.936</b>          | <b>0.035</b>            | 0.013                              |
|                                                 | SE    | 1.001                                                     | <b>0.316</b>          | 0.141                          | 0.256      | 0.114             | <b>0.155</b>       | <b>0.393</b>          | <b>0.011</b>            | 0.257                              |
|                                                 | OR    | 0.101                                                     | <b>0.478</b>          | 1.226                          | 0.698      | 1.090             | 0.833              | <b>18.836</b>         | <b>1.036</b>            | 1.013                              |
|                                                 | p     | 0.022                                                     | <b>0.019</b>          | 0.148                          | 0.160      | 0.449             | 0.237              | <b>&lt;0.001</b>      | <b>0.002</b>            | 0.960                              |
|                                                 | Model | X <sup>2</sup> (8)=123.03; p<0.001; R <sup>2</sup> =0.379 |                       |                                |            |                   |                    |                       |                         |                                    |
| Drink more                                      | B     | -2.593                                                    | -0.222                | -0.041                         | 0.185      | -0.004            | -0.083             | <b>0.955</b>          | 0.002                   | <b>0.594</b>                       |

|                |       | Constant                                                  | Psychiatric morbidity | Burnout (emotional exhaustion) | Job effort | Work-life balance | Coping: Self-blame | Coping: Substance use | Work experience (years) | Work place (hospital) <sup>a</sup> |
|----------------|-------|-----------------------------------------------------------|-----------------------|--------------------------------|------------|-------------------|--------------------|-----------------------|-------------------------|------------------------------------|
| than 3 drinks  | SE    | 0.975                                                     | 0.314                 | 0.141                          | 0.281      | 0.119             | 0.161              | <b>0.206</b>          | 0.012                   | <b>0.276</b>                       |
| typically      | OR    | 0.075                                                     | 0.801                 | 0.772                          | 1.203      | 0.996             | 0.920              | <b>2.599</b>          | 1.002                   | <b>1.812</b>                       |
|                | p     | 0.008                                                     | 0.480                 | 0.960                          | 0.511      | 0.971             | 0.604              | <b>&lt;0.001</b>      | 0.885                   | <b>0.031</b>                       |
|                | Model | X <sup>2</sup> (8)=29.10; p<0.001; R <sup>2</sup> =0.118  |                       |                                |            |                   |                    |                       |                         |                                    |
| Drink 6 or     | B     | -0.341                                                    | -0.481                | 0.038                          | -0.440     | 0.148             | -0.190             | <b>1.849</b>          | <b>-0.030</b>           | <b>0.514</b>                       |
| more drinks on | SE    | 0.942                                                     | 0.308                 | 0.135                          | 0.260      | 0.113             | 0.151              | <b>0.267</b>          | <b>0.011</b>            | <b>0.255</b>                       |
| one occasion   | OR    | 0.711                                                     | 0.618                 | 1.039                          | 0.644      | 1.159             | 0.827              | <b>6.355</b>          | <b>0.970</b>            | <b>1.672</b>                       |
|                | p     | 0.717                                                     | 0.118                 | 0.777                          | 0.090      | 0.191             | 0.209              | <b>&lt;0.001</b>      | <b>0.007</b>            | <b>0.044</b>                       |
|                | Model | X <sup>2</sup> (8)=83.18; p<0.001; R <sup>2</sup> =0.279  |                       |                                |            |                   |                    |                       |                         |                                    |
| Alcohol        | B     | -3.171                                                    | -0.047                | 0.037                          | -0.855     | 0.162             | -0.091             | <b>1.819</b>          | -0.041                  | 0.095                              |
| dependence     | SE    | 1.781                                                     | 0.581                 | 0.286                          | 0.623      | 0.269             | 0.350              | <b>0.359</b>          | 0.028                   | 0.616                              |
|                | OR    | 0.042                                                     | 0.955                 | 1.037                          | 0.425      | 1.176             | 0.913              | <b>6.165</b>          | 0.960                   | 1.100                              |
|                | p     | 0.075                                                     | 0.936                 | 0.898                          | 0.170      | 0.548             | 0.795              | <b>&lt;0.001</b>      | 0.153                   | 0.877                              |
|                | Model | X <sup>2</sup> (8)=34.648; p<0.001; R <sup>2</sup> =0.280 |                       |                                |            |                   |                    |                       |                         |                                    |
| Drug use       | B     | -1.732                                                    | -0.084                | 0.073                          | 0.192      | 0.067             | 0.068              | <b>0.425</b>          | -0.011                  | -0.047                             |
|                | SE    | 0.830                                                     | 0.256                 | 0.120                          | 0.228      | 0.099             | 0.133              | <b>0.186</b>          | 0.010                   | 0.226                              |
|                | OR    | 0.177                                                     | 0.92                  | 1.076                          | 1.211      | 1.069             | 1.070              | <b>1.530</b>          | 0.989                   | 0.954                              |
|                | p     | 0.037                                                     | 0.744                 | 0.541                          | 0.400      | 0.501             | 0.608              | <b>0.022</b>          | 0.287                   | 0.835                              |

1  
2  
3  
4  
5  
6  
7  
8  
9  
10  
11  
12  
13  
14  
15  
16  
17  
18  
19  
20  
21  
22  
23  
24  
25  
26  
27  
28  
29  
30  
31  
32  
33  
34  
35  
36  
37  
38  
39  
40  
41  
42  
43  
44  
45  
46

|       | <b>Constant</b>                     | <b>Psychiatric morbidity</b> | <b>Burnout (emotional exhaustion)</b> | <b>Job effort</b> | <b>Work-life balance</b> | <b>Coping: Self-blame</b> | <b>Coping: Substance use</b> | <b>Work experience (years)</b> | <b>Work place (hospital)<sup>a</sup></b> |
|-------|-------------------------------------|------------------------------|---------------------------------------|-------------------|--------------------------|---------------------------|------------------------------|--------------------------------|------------------------------------------|
| Model | $X^2(8)=13.935; p=0.083; R^2=0.051$ |                              |                                       |                   |                          |                           |                              |                                |                                          |

*Note.* n/a – scale is not included in the analysis because predictor is a part of it. <sup>a</sup> 1= Hospital (n=239); 0 = Other (n=175)

For peer review only

**Table 4.** Logistic regression predicting substance binge-eating problems

|                                                         |       | Constant                                                  | Psychiatric morbidity | Burnout (emotional exhaustion) | Job effort | Work-life balance | Coping: Self-blame | Coping: Substance use | Work experience (years) | Work place (hospital) <sup>a</sup> |
|---------------------------------------------------------|-------|-----------------------------------------------------------|-----------------------|--------------------------------|------------|-------------------|--------------------|-----------------------|-------------------------|------------------------------------|
| Eating large amounts of food when not physically hungry | B     | -1.831                                                    | 0.344                 | 0.127                          | -0.403     | 0.176             | <b>0.410</b>       | -0.094                | -0.022                  | -0.040                             |
|                                                         | SE    | 0.935                                                     | 0.290                 | 0.142                          | 0.275      | 0.124             | <b>0.156</b>       | 0.208                 | 0.011                   | 0.271                              |
|                                                         | OR    | 0.160                                                     | 1.410                 | 1.136                          | 0.669      | 1.193             | <b>1.507</b>       | 0.910                 | 0.978                   | 0.961                              |
|                                                         | p     | 0.050                                                     | 0.236                 | 0.370                          | 0.143      | 0.156             | <b>0.009</b>       | 0.652                 | 0.052                   | 0.883                              |
|                                                         | Model | X <sup>2</sup> (8)=29.537; p<0.001; R <sup>2</sup> =0.127 |                       |                                |            |                   |                    |                       |                         |                                    |
| Eat until feeling uncomfortably full                    | B     | -2.229                                                    | 0.064                 | 0.132                          | -0.186     | <b>0.271</b>      | 0.297              | -0.117                | -0.018                  | -0.342                             |
|                                                         | SE    | 0.972                                                     | 0.294                 | 0.144                          | 0.278      | <b>0.131</b>      | 0.159              | 0.214                 | 0.012                   | 0.275                              |
|                                                         | OR    | 0.108                                                     | 1.066                 | 1.141                          | 0.831      | <b>1.311</b>      | 1.346              | 0.890                 | 0.982                   | 0.710                              |
|                                                         | p     | 0.022                                                     | 0.828                 | 0.359                          | 0.504      | <b>0.038</b>      | 0.062              | 0.585                 | 0.121                   | 0.212                              |
|                                                         | Model | X <sup>2</sup> (8)=22.420; p=0.004; R <sup>2</sup> =0.100 |                       |                                |            |                   |                    |                       |                         |                                    |
| Eat alone because they feel embarrassed                 | B     | -3.111                                                    | 0.233                 | 0.213                          | -0.139     | 0.112             | <b>0.378</b>       | 0.089                 | -0.015                  | -0.386                             |
|                                                         | SE    | 1.068                                                     | 0.314                 | 0.158                          | 0.307      | 0.139             | 0.175              | 0.220                 | 0.013                   | 0.300                              |
|                                                         | OR    | 0.045                                                     | 1.262                 | 1.237                          | 0.870      | 1.119             | 1.460              | 1.093                 | 0.985                   | 0.680                              |
|                                                         | p     | 0.004                                                     | 0.458                 | 0.178                          | 0.650      | 0.418             | 0.031              | 0.686                 | 0.255                   | 0.199                              |
|                                                         | Model | X <sup>2</sup> (8)=21.890; p=0.005; R <sup>2</sup> =0.105 |                       |                                |            |                   |                    |                       |                         |                                    |
| Feel disgusted                                          | B     | -2.237                                                    | 0.079                 | <b>0.321</b>                   | -0.313     | 0.208             | 0.335              | 0.154                 | <b>-0.034</b>           | <b>-0.791</b>                      |



|                |       | Constan<br>t                                              | Psychiatric<br>morbidity | Burnout<br>(emotional<br>exhaustion) | Job<br>effort    | Work-life<br>balance | Coping:<br>Self-<br>blame | Coping:<br>Substance<br>use | Work<br>experienc<br>e (years) | Work place<br>(hospital) <sup>a</sup> |
|----------------|-------|-----------------------------------------------------------|--------------------------|--------------------------------------|------------------|----------------------|---------------------------|-----------------------------|--------------------------------|---------------------------------------|
| with           | SE    | 1.036                                                     | 0.310                    | <b>0.155</b>                         | 0.299            | 0.138                | 0.172                     | 0.218                       | <b>0.013</b>                   | <b>0.298</b>                          |
| themselves,    | OR    | 0.107                                                     | 1.082                    | <b>1.378</b>                         | 0.731            | 1.231                | 1.398                     | 1.166                       | <b>0.966</b>                   | <b>0.453</b>                          |
| depressed or   | p     | 0.031                                                     | 0.799                    | <b>0.038</b>                         | 0.295            | 0.132                | 0.052                     | 0.481                       | <b>0.009</b>                   | <b>0.008</b>                          |
| very guilty    | Model | X <sup>2</sup> (8)=38.029; p<0.001; R <sup>2</sup> =0.171 |                          |                                      |                  |                      |                           |                             |                                |                                       |
| after          |       |                                                           |                          |                                      |                  |                      |                           |                             |                                |                                       |
| overeating     |       |                                                           |                          |                                      |                  |                      |                           |                             |                                |                                       |
| Feel upset     | B     | -2.367                                                    | -0.187                   | <b>0.324</b>                         | -0.234           | 0.206                | <b>0.337</b>              | 0.021                       | -0.015                         | -0.200                                |
| about their    | SE    | 0.998                                                     | 0.302                    | <b>0.150</b>                         | 0.287            | 0.133                | <b>0.164</b>              | 0.212                       | 0.012                          | 0.282                                 |
| uncontrollable | OR    | 0.094                                                     | 0.830                    | <b>1.383</b>                         | 0.792            | 1.228                | <b>1.400</b>              | 1.021                       | 0.986                          | 0.819                                 |
| eating or      | p     | 0.018                                                     | 0.537                    | <b>0.030</b>                         | 0.416            | 0.121                | <b>0.040</b>              | 0.922                       | 0.231                          | 0.478                                 |
| weight gain    | Model | X <sup>2</sup> (8)=23.374; p=0.003; R <sup>2</sup> =0.106 |                          |                                      |                  |                      |                           |                             |                                |                                       |
| Binge eating   | B     | -1.064                                                    | -0.343                   | <b>0.610</b>                         | <b>-1.678</b>    | 0.250                | 0.473                     | 0.220                       | -0.014                         | 0.224                                 |
|                | SE    | 1.395                                                     | 0.445                    | <b>0.237</b>                         | <b>0.443</b>     | 0.219                | 0.253                     | 0.309                       | 0.019                          | 0.444                                 |
|                | OR    | 0.345                                                     | 0.710                    | <b>1.841</b>                         | <b>0.187</b>     | 1.284                | 1.606                     | 1.246                       | 0.986                          | 1.251                                 |
|                | p     | 0.446                                                     | 0.440                    | <b>0.010</b>                         | <b>&lt;0.001</b> | 0.253                | 0.062                     | 0.477                       | 0.458                          | 0.614                                 |
|                | Model | X <sup>2</sup> (8)=27.089; p=0.001; R <sup>2</sup> =0.163 |                          |                                      |                  |                      |                           |                             |                                |                                       |

Note. <sup>a</sup> 1= Hospital (n=239); 0 = Other (n=175)

**Table 5.** Logistic regression predicting sleep disturbances

|                                 |       | Constant                                                 | Psychiatric morbidity | Burnout (emotional exhaustion) | Job effort | Work-life balance | Coping: Self-blame | Coping: Substance use | Work experience (years) | Work place (hospital) <sup>a</sup> |
|---------------------------------|-------|----------------------------------------------------------|-----------------------|--------------------------------|------------|-------------------|--------------------|-----------------------|-------------------------|------------------------------------|
| Difficulty falling asleep       | B     | -5.019                                                   | <b>0.906</b>          | <b>0.393</b>                   | -0.303     | 0.107             | -0.039             | <b>0.617</b>          | -0.022                  | <b>0.669</b>                       |
|                                 | SE    | 1.098                                                    | <b>0.304</b>          | <b>0.158</b>                   | 0.313      | 0.139             | 0.171              | <b>0.210</b>          | 0.013                   | <b>0.308</b>                       |
|                                 | OR    | 0.007                                                    | <b>2.474</b>          | <b>1.482</b>                   | 0.738      | 1.113             | 0.962              | <b>1.854</b>          | 0.979                   | <b>1.953</b>                       |
|                                 | p     | <0.001                                                   | <b>0.003</b>          | <b>0.013</b>                   | 0.333      | 0.443             | 0.822              | <b>0.003</b>          | 0.103                   | <b>0.030</b>                       |
|                                 | Model | X <sup>2</sup> (8)=65.69; p<0.001; R <sup>2</sup> =0.249 |                       |                                |            |                   |                    |                       |                         |                                    |
| Difficulty staying asleep       | B     | -5.593                                                   | <b>0.829</b>          | <b>0.468</b>                   | -0.022     | 0.038             | 0.155              | <b>0.443</b>          | 0.014                   | 0.275                              |
|                                 | SE    | 1.014                                                    | <b>0.286</b>          | <b>0.137</b>                   | 0.267      | 0.114             | 0.148              | <b>0.202</b>          | 0.012                   | 0.257                              |
|                                 | OR    | 0.004                                                    | <b>2.291</b>          | <b>1.596</b>                   | 0.978      | 1.039             | 1.168              | <b>1.557</b>          | 1.014                   | 1.317                              |
|                                 | p     | <0.001                                                   | <b>0.004</b>          | <b>0.001</b>                   | 0.933      | 0.741             | 0.296              | <b>0.028</b>          | 0.233                   | 0.285                              |
|                                 | Model | X <sup>2</sup> (8)=79.09; p<0.001; R <sup>2</sup> =0.264 |                       |                                |            |                   |                    |                       |                         |                                    |
| Dissatisfied with sleep pattern | B     | -3.678                                                   | <b>0.962</b>          | <b>0.536</b>                   | -0.142     | -0.050            | -0.006             | 0.280                 | -0.014                  | 0.438                              |
|                                 | SE    | 0.937                                                    | <b>0.292</b>          | <b>0.134</b>                   | 0.256      | 0.108             | 0.143              | 0.200                 | 0.011                   | 0.250                              |
|                                 | OR    | 0.025                                                    | <b>2.617</b>          | <b>1.710</b>                   | 0.868      | 0.642             | 0.994              | 1.324                 | 0.986                   | 1.549                              |
|                                 | p     | <0.001                                                   | <b>0.001</b>          | <b>&lt;0.001</b>               | 0.579      | 0.951             | 0.966              | 0.160                 | 0.200                   | 0.080                              |
|                                 | Model | X <sup>2</sup> (8)=85.18; p<0.001; R <sup>2</sup> =0.274 |                       |                                |            |                   |                    |                       |                         |                                    |
| Sleep problems interfere with   | B     | -5.352                                                   | <b>1.047</b>          | <b>0.492</b>                   | -0.303     | 0.058             | <b>0.347</b>       | <b>0.485</b>          | -0.016                  | 0.483                              |
|                                 | SE    | 1.040                                                    | <b>0.299</b>          | <b>0.144</b>                   | 0.283      | 0.120             | <b>0.153</b>       | <b>0.208</b>          | 0.012                   | 0.272                              |

|                                                     |       | Constant                                                  | Psychiatric morbidity | Burnout (emotional exhaustion) | Job effort | Work-life balance | Coping: Self-blame | Coping: Substance use | Work experience (years) | Work place (hospital) <sup>a</sup> |
|-----------------------------------------------------|-------|-----------------------------------------------------------|-----------------------|--------------------------------|------------|-------------------|--------------------|-----------------------|-------------------------|------------------------------------|
| daily functioning                                   | OR    | 0.005                                                     | <b>2.848</b>          | <b>1.6360</b>                  | 0.739      | 1.059             | <b>1.414</b>       | <b>1.625</b>          | 0.984                   | 1.621                              |
|                                                     | p     | <0.001                                                    | <b>&lt;0.001</b>      | <b>0.001</b>                   | 0.284      | 0.631             | <b>0.023</b>       | <b>0.019</b>          | 0.187                   | 0.075                              |
|                                                     | Model | X <sup>2</sup> (8)=102.74; p<0.001; R <sup>2</sup> =0.333 |                       |                                |            |                   |                    |                       |                         |                                    |
| Worried or distressed about a current sleep problem | B     | -6.003                                                    | <b>1.342</b>          | <b>0.570</b>                   | -0.414     | 0.014             | 0.267              | -0.033                | 0-.013                  | <b>0.776</b>                       |
|                                                     | SE    | 1.202                                                     | <b>0.321</b>          | <b>0.171</b>                   | 0.340      | 0.146             | 0.179              | 0.232                 | 0.014                   | <b>0.331</b>                       |
|                                                     | OR    | 0.002                                                     | <b>3.826</b>          | <b>1.768</b>                   | 0.661      | 1.014             | 1.306              | 0.968                 | 0.987                   | <b>2.172</b>                       |
|                                                     | p     | <0.001                                                    | <b>&lt;0.001</b>      | <b>0.001</b>                   | 0.224      | 0.924             | 0.136              | 0.888                 | 0.362                   | <b>0.019</b>                       |
|                                                     | Model | X <sup>2</sup> (8)=86.58; p<0.001; R <sup>2</sup> =0.327  |                       |                                |            |                   |                    |                       |                         |                                    |
| Think about work when they go to bed                | B     | -6.476                                                    | <b>0.750</b>          | <b>0.295</b>                   | 0.214      | <b>0.456</b>      | <b>0.616</b>       | -0.053                | -0.010                  | 0.399                              |
|                                                     | SE    | 1.091                                                     | <b>0.337</b>          | <b>0.141</b>                   | 0.263      | <b>0.116</b>      | <b>0.160</b>       | 0.227                 | 0.012                   | 0.263                              |
|                                                     | OR    | 0.002                                                     | <b>2.117</b>          | <b>1.344</b>                   | 1.238      | <b>1.577</b>      | <b>1.851</b>       | 0.948                 | 0.990                   | 1.491                              |
|                                                     | p     | <0.001                                                    | <b>0.026</b>          | <b>0.036</b>                   | 0.416      | <b>&lt;0.001</b>  | <b>&lt;0.001</b>   | 0.814                 | 0.393                   | 0.128                              |
|                                                     | Model | X <sup>2</sup> (8)=128.23; p<0.001; R <sup>2</sup> =0.391 |                       |                                |            |                   |                    |                       |                         |                                    |
| Trouble sleeping if they postpone tasks             | B     | -3.377                                                    | 0.434                 | <b>0.337</b>                   | -0.273     | 0.243             | <b>0.460</b>       | 0.090                 | -0.013                  | 0.011                              |
|                                                     | SE    | 0.901                                                     | 0.277                 | <b>0.128</b>                   | 0.247      | 0.107             | <b>0.140</b>       | 0.196                 | 0.011                   | 0.239                              |
|                                                     | OR    | 0.034                                                     | 1.544                 | <b>1.401</b>                   | 0.761      | 1.275             | <b>1.584</b>       | 1.094                 | 0.988                   | 1.011                              |
|                                                     | p     | <0.001                                                    | 0.117                 | <b>0.008</b>                   | 0.270      | 0.023             | <b>0.001</b>       | 0.648                 | 0.237                   | 0.965                              |
|                                                     | Model | X <sup>2</sup> (8)=72.32; p<0.001; R <sup>2</sup> =0.234  |                       |                                |            |                   |                    |                       |                         |                                    |

|          |       | Constan<br>t                                             | Psychiatric<br>morbidity | Burnout<br>(emotional<br>exhaustion) | Job<br>effort | Work-life<br>balance | Coping:<br>Self-<br>blame | Coping:<br>Substance<br>use | Work<br>experienc<br>e (years) | Work place<br>(hospital) <sup>a</sup> |
|----------|-------|----------------------------------------------------------|--------------------------|--------------------------------------|---------------|----------------------|---------------------------|-----------------------------|--------------------------------|---------------------------------------|
| Insomnia | B     | -8.627                                                   | <b>1.458</b>             | <b>0.597</b>                         | -0.109        | 0.035                | 0.346                     | 0.148                       | -0.025                         | 0.802                                 |
|          | SE    | 1.600                                                    | <b>0.378</b>             | <b>0.216</b>                         | 0.433         | 0.191                | 0.226                     | 0.270                       | 0.018                          | 0.417                                 |
|          | OR    | <0.001                                                   | <b>4.299</b>             | <b>1.817</b>                         | 0.897         | 1.036                | 1.414                     | 1.160                       | 0.975                          | 2.231                                 |
|          | p     | <0.001                                                   | <b>&lt;0.001</b>         | <b>0.006</b>                         | 0.802         | 0.854                | 0.126                     | 0.582                       | 0.162                          | 0.054                                 |
|          | Model | X <sup>2</sup> (8)=78.24; p<0.001; R <sup>2</sup> =0.360 |                          |                                      |               |                      |                           |                             |                                |                                       |

*Note.* <sup>a</sup> 1= Hospital (n=239); 0 = Other (n=175)

**Table 6.** Logistic regression predicting ill health

|                         |       | Constant                                                   | Psychiatric morbidity | Burnout (emotional exhaustion) | Job effort   | Work-life balance | Coping: Self-blame | Coping: Substance use | Work experience (years) | Work place (hospital) <sup>a</sup> |
|-------------------------|-------|------------------------------------------------------------|-----------------------|--------------------------------|--------------|-------------------|--------------------|-----------------------|-------------------------|------------------------------------|
| Fatigue                 | B     | -3.632                                                     | <b>0.947</b>          | <b>0.590</b>                   | 0.127        | 0.056             | 0.308              | 0.083                 | <b>-0.029</b>           | -0.130                             |
|                         | SE    | 1.079                                                      | <b>0.386</b>          | <b>0.152</b>                   | 0.267        | 0.115             | 0.164              | 0.247                 | <b>0.012</b>            | 0.276                              |
|                         | OR    | 0.026                                                      | <b>2.577</b>          | <b>1.804</b>                   | 1.135        | 1.058             | 1.360              | 1.087                 | <b>0.972</b>            | 0.878                              |
|                         | p     | 0.001                                                      | <b>0.014</b>          | <b>&lt;0.001</b>               | 0.635        | 0.623             | 0.060              | 0.735                 | <b>0.019</b>            | 0.637                              |
|                         | Model | X <sup>2</sup> (8)=106.899; p<0.001; R <sup>2</sup> =0.352 |                       |                                |              |                   |                    |                       |                         |                                    |
| Upset stomach or nausea | B     | -3.970                                                     | <b>1.265</b>          | 0.094                          | 0.091        | -0.011            | 0.057              | -0.200                | <b>-0.038</b>           | -0.059                             |
|                         | SE    | 1.089                                                      | <b>0.312</b>          | 0.157                          | 0.313        | 0.136             | 0.173              | 0.237                 | <b>0.014</b>            | 0.303                              |
|                         | OR    | 0.019                                                      | <b>3.544</b>          | 1.098                          | 1.095        | 0.989             | 1.059              | 0.819                 | <b>0.963</b>            | 0.942                              |
|                         | p     | <0.001                                                     | <b>&lt;0.001</b>      | 0.550                          | 0.771        | 0.936             | 0.742              | 0.399                 | <b>0.006</b>            | 0.845                              |
|                         | Model | X <sup>2</sup> (8)=45.36; p<0.001; R <sup>2</sup> =0.185   |                       |                                |              |                   |                    |                       |                         |                                    |
| Backache                | B     | -2.011                                                     | 0.218                 | 0.176                          | -0.172       | 0.161             | 0.026              | -0.070                | -0.001                  | -0.025                             |
|                         | SE    | 0.863                                                      | 0.262                 | 0.126                          | 0.244        | 0.108             | 0.139              | 0.190                 | 0.010                   | 0.237                              |
|                         | OR    | 0.134                                                      | 1.243                 | 1.193                          | 0.842        | 1.175             | 1.026              | 0.932                 | 0.999                   | 0.975                              |
|                         | p     | 0.020                                                      | 0.407                 | 0.161                          | 0.481        | 0.138             | 0.854              | 0.712                 | 0.955                   | 0.917                              |
|                         | Model | X <sup>2</sup> (8)=13.96; p=0.083; R <sup>2</sup> =0.051   |                       |                                |              |                   |                    |                       |                         |                                    |
| Headaches               | B     | -6.523                                                     | <b>0.944</b>          | 0.272                          | <b>0.644</b> | 0.069             | 0.035              | 0.132                 | <b>-0.029</b>           | 0.394                              |
|                         | SE    | 1.114                                                      | <b>0.293</b>          | 0.143                          | <b>0.297</b> | 0.125             | 0.158              | 0.208                 | <b>0.013</b>            | 0.280                              |

|                               |       | Constant                                                  | Psychiatric morbidity | Burnout (emotional exhaustion) | Job effort   | Work-life balance | Coping: Self-blame | Coping: Substance use | Work experience (years) | Work place (hospital) <sup>a</sup> |
|-------------------------------|-------|-----------------------------------------------------------|-----------------------|--------------------------------|--------------|-------------------|--------------------|-----------------------|-------------------------|------------------------------------|
|                               | OR    | 0.001                                                     | <b>2.570</b>          | 1.313                          | <b>1.905</b> | 1.071             | 1.035              | 1.141                 | <b>0.972</b>            | 1.483                              |
|                               | p     | <0.001                                                    | <b>0.001</b>          | 0.057                          | <b>0.030</b> | 0.580             | 0.826              | 0.527                 | <b>0.024</b>            | 0.160                              |
|                               | Model | X <sup>2</sup> (8)=75.67; p<0.001; R <sup>2</sup> =0.267  |                       |                                |              |                   |                    |                       |                         |                                    |
| Acid indigestion or heartburn | B     | -4.707                                                    | <b>0.826</b>          | 0.120                          | 0.323        | -0.011            | 0.007              | -0.062                | 0.007                   | 0.185                              |
|                               | SE    | 1.030                                                     | <b>0.290</b>          | 0.142                          | 0.284        | 0.119             | 0.158              | 0.209                 | 0.012                   | 0.270                              |
|                               | OR    | 0.009                                                     | <b>2.284</b>          | 1.128                          | 1.382        | 0.989             | 1.007              | 0.940                 | 1.007                   | 1.203                              |
|                               | p     | <0.001                                                    | <b>0.004</b>          | 0.398                          | 0.255        | 0.928             | 0.965              | 0.768                 | 0.549                   | 0.493                              |
|                               | Model | X <sup>2</sup> (8)=27.78; p=0.001; R <sup>2</sup> =0.109  |                       |                                |              |                   |                    |                       |                         |                                    |
| Eye strain                    | B     | -3.929                                                    | <b>0.657</b>          | -0.06                          | 0.496        | 0.066             | -0.027             | 0.088                 | -0.012                  | -0.129                             |
|                               | SE    | 0.945                                                     | <b>0.275</b>          | 0.13                           | 0.259        | 0.110             | 0.146              | 0.194                 | 0.011                   | 0.249                              |
|                               | OR    | 0.020                                                     | <b>1.930</b>          | 0.942                          | 1.641        | 1.068             | 0.973              | 1.092                 | 0.988                   | 0.879                              |
|                               | p     | <0.001                                                    | <b>0.017</b>          | 0.647                          | 0.056        | 0.550             | 0.851              | 0.650                 | 0.299                   | 0.606                              |
|                               | Model | X <sup>2</sup> (8)= 22.45; p=0.004; R <sup>2</sup> =0.084 |                       |                                |              |                   |                    |                       |                         |                                    |
| Diarrhea                      | B     | -5.574                                                    | 0.576                 | -0.155                         | -0.245       | <b>0.541</b>      | 0.212              | -0.020                | 0.002                   | 0.148                              |
|                               | SE    | 1.317                                                     | 0.349                 | 0.179                          | 0.363        | <b>0.191</b>      | 0.198              | 0.259                 | 0.015                   | 0.350                              |
|                               | OR    | 0.004                                                     | 1.779                 | 0.857                          | 0.783        | <b>1.717</b>      | 1.237              | 0.981                 | 1.002                   | 1.159                              |
|                               | p     | <0.001                                                    | 0.098                 | 0.386                          | 0.501        | <b>0.005</b>      | 0.284              | 0.940                 | 0.877                   | 0.672                              |
|                               | Model | X <sup>2</sup> (8)=21.640; p=0.006; R <sup>2</sup> =0.106 |                       |                                |              |                   |                    |                       |                         |                                    |

|                 |       | Constan                                                   | Psychiatric | Burnout     | Job    | Work-life | Coping: | Coping:   | Work         | Work place              |
|-----------------|-------|-----------------------------------------------------------|-------------|-------------|--------|-----------|---------|-----------|--------------|-------------------------|
|                 |       | t                                                         | morbidity   | (emotional  | effort | balance   | Self-   | Substance | experienc    | (hospital) <sup>a</sup> |
|                 |       |                                                           |             | exhaustion) |        |           | blame   | use       | e (years)    |                         |
| Ringings in the | B     | -3.318                                                    | 0.315       | 0.292       | -0.372 | -0.018    | 0.063   | -0.155    | <b>0.048</b> | <0.0001                 |
| ears            | SE    | 1.204                                                     | 0.358       | 0.182       | 0.342  | 0.144     | 0.192   | 0.262     | <b>0.015</b> | 0.316                   |
|                 | OR    | 0.036                                                     | 1.370       | 1.338       | 0.689  | 0.983     | 1.065   | 0.857     | <b>1.050</b> | 1.000                   |
|                 | p     | 0.006                                                     | 0.379       | 0.109       | 0.277  | 0.903     | 0.742   | 0.555     | <b>0.002</b> | 1.000                   |
|                 | Model | X <sup>2</sup> (8)=16.817; p=0.032; R <sup>2</sup> =0.080 |             |             |        |           |         |           |              |                         |

Note. <sup>a</sup> 1= Hospital (n=239); 0 = Other (n=175)

1  
2  
3  
4  
5  
6  
7  
8  
9  
10  
11  
12  
13  
14  
15  
16  
17  
18  
19  
20  
21  
22  
23  
24  
25  
26  
27  
28  
29  
30  
31  
32  
33  
34  
35  
36  
37  
38  
39  
40  
41  
42  
43  
44  
45  
46

1  
2  
3  
4  
5  
6  
7  
8  
9  
10  
11  
12  
13  
14  
15  
16  
17  
18  
19  
20  
21  
22  
23  
24  
25  
26  
27  
28  
29  
30  
31  
32  
33  
34  
35  
36  
37  
38  
39  
40  
41  
42  
43  
44  
45  
46  
47  
48  
49  
50  
51  
52  
53  
54  
55  
56  
57  
58  
59  
60

For peer review only



1  
2  
3  
4  
5  
6  
7  
8  
9  
10  
11  
12  
13  
14  
15  
16  
17  
18  
19  
20  
21  
22  
23  
24  
25  
26  
27  
28  
29  
30  
31  
32  
33  
34  
35  
36  
37  
38  
39  
40  
41  
42  
43  
44  
45  
46  
47  
48  
49  
50  
51  
52  
53  
54  
55  
56  
57  
58  
59  
60STROBE Statement—Checklist of items that should be included in reports of *cross-sectional studies*

|                              | <b>Item No</b> | <b>Recommendation</b>                                                                                                                                                                             | <b>Page number</b>                                     |
|------------------------------|----------------|---------------------------------------------------------------------------------------------------------------------------------------------------------------------------------------------------|--------------------------------------------------------|
| <b>Title and abstract</b>    | 1              | (a) Indicate the study's design with a commonly used term in the title or the abstract                                                                                                            | 1-3                                                    |
|                              |                | (b) Provide in the abstract an informative and balanced summary of what was done and what was found                                                                                               | 2-3                                                    |
| <b>Introduction</b>          |                |                                                                                                                                                                                                   |                                                        |
| Background/rationale         | 2              | Explain the scientific background and rationale for the investigation being reported                                                                                                              | 4-6                                                    |
| Objectives                   | 3              | State specific objectives, including any prespecified hypotheses                                                                                                                                  | 6-7                                                    |
| <b>Methods</b>               |                |                                                                                                                                                                                                   |                                                        |
| Study design                 | 4              | Present key elements of study design early in the paper                                                                                                                                           | 7                                                      |
| Setting                      | 5              | Describe the setting, locations, and relevant dates, including periods of recruitment, exposure, follow-up, and data collection                                                                   | 7                                                      |
| Participants                 | 6              | (a) Give the eligibility criteria, and the sources and methods of selection of participants                                                                                                       | 7                                                      |
| Variables                    | 7              | Clearly define all outcomes, exposures, predictors, potential confounders, and effect modifiers. Give diagnostic criteria, if applicable                                                          | 8-9                                                    |
| Data sources/<br>measurement | 8*             | For each variable of interest, give sources of data and details of methods of assessment (measurement). Describe comparability of assessment methods if there is more than one group              | 8-9                                                    |
| Bias                         | 9              | Describe any efforts to address potential sources of bias                                                                                                                                         | 7                                                      |
| Study size                   | 10             | Explain how the study size was arrived at                                                                                                                                                         | Not explained as was based on requirements for the RCT |
| Quantitative variables       | 11             | Explain how quantitative variables were handled in the analyses. If applicable, describe which groupings were chosen and why                                                                      | 9                                                      |
| Statistical methods          | 12             | (a) Describe all statistical methods, including those used to control for confounding                                                                                                             | 9                                                      |
|                              |                | (b) Describe any methods used to examine subgroups and interactions                                                                                                                               | -                                                      |
|                              |                | (c) Explain how missing data were addressed                                                                                                                                                       | -                                                      |
|                              |                | (d) If applicable, describe analytical methods taking account of sampling strategy                                                                                                                | -                                                      |
|                              |                | (e) Describe any sensitivity analyses                                                                                                                                                             | -                                                      |
| <b>Results</b>               |                |                                                                                                                                                                                                   |                                                        |
| Participants                 | 13*            | (a) Report numbers of individuals at each stage of study—eg numbers potentially eligible, examined for eligibility, confirmed eligible, included in the study, completing follow-up, and analysed | 9-10                                                   |
|                              |                | (b) Give reasons for non-participation at each stage                                                                                                                                              | -                                                      |
|                              |                | (c) Consider use of a flow diagram                                                                                                                                                                | -                                                      |
| Descriptive data             | 14*            | (a) Give characteristics of study participants (eg demographic,                                                                                                                                   | 9-10                                                   |

|                          |     |                                                                                                                                                                                                              |                |
|--------------------------|-----|--------------------------------------------------------------------------------------------------------------------------------------------------------------------------------------------------------------|----------------|
|                          |     | clinical, social) and information on exposures and potential confounders                                                                                                                                     |                |
|                          |     | (b) Indicate number of participants with missing data for each variable of interest                                                                                                                          | -              |
| Outcome data             | 15* | Report numbers of outcome events or summary measures                                                                                                                                                         | 10-13; Table 1 |
| Main results             | 16  | (a) Give unadjusted estimates and, if applicable, confounder-adjusted estimates and their precision (eg, 95% confidence interval). Make clear which confounders were adjusted for and why they were included | 10-13          |
|                          |     | (b) Report category boundaries when continuous variables were categorized                                                                                                                                    | 9; Table 1     |
|                          |     | (c) If relevant, consider translating estimates of relative risk into absolute risk for a meaningful time period                                                                                             | -              |
| Other analyses           | 17  | Report other analyses done—eg analyses of subgroups and interactions, and sensitivity analyses                                                                                                               | -              |
| <b>Discussion</b>        |     |                                                                                                                                                                                                              |                |
| Key results              | 18  | Summarise key results with reference to study objectives                                                                                                                                                     | 13-16          |
| Limitations              | 19  | Discuss limitations of the study, taking into account sources of potential bias or imprecision. Discuss both direction and magnitude of any potential bias                                                   | 16             |
| Interpretation           | 20  | Give a cautious overall interpretation of results considering objectives, limitations, multiplicity of analyses, results from similar studies, and other relevant evidence                                   | 13-16          |
| Generalisability         | 21  | Discuss the generalisability (external validity) of the study results                                                                                                                                        | 16             |
| <b>Other information</b> |     |                                                                                                                                                                                                              |                |
| Funding                  | 22  | Give the source of funding and the role of the funders for the present study and, if applicable, for the original study on which the present article is based                                                | 16             |

\*Give information separately for exposed and unexposed groups.

**Note:** An Explanation and Elaboration article discusses each checklist item and gives methodological background and published examples of transparent reporting. The STROBE checklist is best used in conjunction with this article (freely available on the Web sites of PLoS Medicine at <http://www.plosmedicine.org/>, Annals of Internal Medicine at <http://www.annals.org/>, and Epidemiology at <http://www.epidem.com/>). Information on the STROBE Initiative is available at [www.strobe-statement.org](http://www.strobe-statement.org).

# BMJ Open

## Does occupational distress raise the risk of alcohol use, binge-eating, ill health and sleep problems among medical doctors? A UK cross-sectional study

|                                 |                                                                                                                                                                                |
|---------------------------------|--------------------------------------------------------------------------------------------------------------------------------------------------------------------------------|
| Journal:                        | <i>BMJ Open</i>                                                                                                                                                                |
| Manuscript ID                   | bmjopen-2018-027362.R2                                                                                                                                                         |
| Article Type:                   | Research                                                                                                                                                                       |
| Date Submitted by the Author:   | 23-Feb-2019                                                                                                                                                                    |
| Complete List of Authors:       | Medisauskaite, Asta; UCL, Research Department of Medical Education<br>Kamau, Caroline; Birkbeck, University of London, Department of Organizational Psychology                 |
| <b>Primary Subject Heading</b>: | Occupational and environmental medicine                                                                                                                                        |
| Secondary Subject Heading:      | Health services research, Mental health                                                                                                                                        |
| Keywords:                       | Health & safety < HEALTH SERVICES ADMINISTRATION & MANAGEMENT, MENTAL HEALTH, OCCUPATIONAL & INDUSTRIAL MEDICINE, Substance misuse < PSYCHIATRY, Eating disorders < PSYCHIATRY |
|                                 |                                                                                                                                                                                |

SCHOLARONE™  
Manuscripts

1  
2  
3 1 **Does occupational distress raise the risk of alcohol use, binge-eating, ill health and sleep**  
4  
5 2 **problems among medical doctors? A UK cross-sectional study**  
6  
7  
8 3  
9

10 4 Asta Medisauskaite, PhD<sup>1</sup> & Caroline Kamau, PhD<sup>2</sup>  
11

12 5 <sup>1</sup> Research Department of Medical Education, UCL Medical School Room, GF/644, Royal  
13 Free Hospital, NW3 2PF.  
14 6

15 7 <sup>2</sup> Birkbeck Centre for Medical Humanities, Birkbeck, University of London, Malet Street,  
16 London, WC1E 7HX.  
17 8  
18

19 9

20 10

21 11

22 12 *Corresponding author:* Asta Medisauskaite, Research Department of Medical Education,  
23 UCL Medical School Room GF/644, Royal Free Hospital, NW3 2PF. E-mail address:  
24 [a.medisauskaite@ucl.ac.uk](mailto:a.medisauskaite@ucl.ac.uk). Telephone number: +44 2031086654  
25 13  
26 14  
27

28 15

29 16  
30  
31  
32  
33  
34  
35  
36  
37  
38  
39  
40  
41  
42  
43  
44  
45  
46  
47  
48  
49  
50  
51  
52  
53  
54  
55  
56  
57  
58  
59  
60

## Abstract

**Objectives.** This study aims to assess the prevalence of health problems (e.g. insomnia, binge-eating, substance use, and ill health) among UK doctors and to investigate whether occupational distress increases the risk of health problems.

**Design.** This study reports the analysis of data collected at the baseline stage of a randomised controlled trial (protocol #NCT02838290).

**Setting.** Doctors were invited through medical Royal Colleges, the British Medical Association's research panel, and a random selection of NHS trusts across various UK regions.

**Participants:** 417 UK doctors with an equivalent split of gender (48% males) and seniority (49% consultants).

**Main Outcomes and Measures:** Outcomes were sleep problems (e.g. insomnia), alcohol/drug use (e.g. binge-drinking), ill health (e.g. backache) and binge-eating (e.g. uncontrollable eating). Predictor variables were occupational distress (psychiatric morbidity, burnout, job effort, work-life imbalance, coping with stress through self-blame or substances) and work factors (workplace and years practicing medicine).

**Results:** 44% of doctors binge-drank and 5% met the criteria for alcohol dependence; 24-29% experienced negative emotions after overeating and 8% had a binge-eating disorder; 20-61% had some type of sleep problem and 12% had severe/moderate insomnia; 69% had fatigue and 19-29% experienced other types of ill health problems. The results show that occupational distress and job factors increase the odds of doctors using substances, having sleep problems, presenting with frequent symptoms of ill health, and binge-eating. For example, burnout increased the risk of all types of sleep problems, e.g. difficulty falling/staying asleep, insomnia (OR $\geq$ 1.344;  $p \leq 0.036$ ). Even taking into consideration

1  
2  
3 1 whether or not a doctor works in a hospital, the risk of health problems still rises when  
4  
5 2 doctors have signs of occupational distress.

6  
7  
8 3 **Conclusion.** Early recognition of occupational distress can prevent health problems among  
9  
10 4 UK doctors that can reduce the quality of patient care because of sickness-related absence.

### 5 **Strengths and limitations of this study**

- 6
- 7 • This is the first study to explore a wide range of health problems among UK doctors  
8 and to examine work-related risk factors;
  - 9 • The study was piloted by consulting doctors about the method before the study  
10 started;
  - 11 • This is a cross-sectional study and therefore it is not possible to draw conclusions  
12 about causation;
  - 13 • It was not possible to calculate the response rate because it was not clear if all NHS  
14 trusts and Royal Colleges who agreed to invite doctors to take part in this research did  
15 send out the invitations, and to how many doctors.
- 16

## Introduction

Distress suffered by doctors has significant consequences for patient care. A recent meta-analysis of 47 studies found that burned-out doctors were more likely to provide poor quality care because of reduced professionalism, and they were more likely to be associated with poor patient satisfaction and incidents that jeopardise patient safety.[1] There is a high prevalence of distress among doctors in the United Kingdom (UK), with a systematic review of 30 studies showing that 17% to 52% of doctors have psychiatric morbidity,[2] higher than the prevalence rate of 19% in the general population,[3] and 31% to 54% of doctors have a type of burnout called emotional exhaustion.[2] Little is known, however, about whether occupational distress raises the risk of health problems (e.g. insomnia, binge-drinking) that might compel doctors to be absent from work or take sick leave resulting in under-staffing and a risk to patient safety.

Occupational distress can be described as a syndrome comprising of burnout, depression, maladaptive coping strategies and other symptoms.[4] The potential implications for risks to patient safety due to sickness-absence make it useful to investigate the impact of different types of occupational distress on the relative risk of: (a) behaviours that have an impact on doctors' health such as alcohol/drug use and binge-eating; (b) health issues such as sleep disturbances and daily or weekly symptoms of ill health (e.g. headaches or fatigue). This is the first study to examine such a broad spectrum of health consequences among doctors. The other innovation of the current study is that, whereas many previous studies have sampled US doctors [5] or individual specialties such as oncology [6] and surgery,[7] this study sheds new light on the impact of occupational distress on health problems among doctors in the UK.

*Does occupational distress increase the risk of doctors using alcohol or drugs?*

Workers experiencing occupational distress are more likely to regularly drink alcohol, binge-drink or use drugs as a method of coping.[8,9] Doctors, on average, report equivalent or lower rates of alcohol abuse than the general population [10] but daily alcohol consumption or binge-drinking that does not meet the threshold for diagnosis of alcoholism is still problematic,[11,12] and symptomatic of psychological distress. In the US, 10% of doctors drink alcohol daily and 8% report severe alcohol or drug misuse or dependence at some point in their lives.[5] Prescription drug abuse is particularly problematic because doctors are up to

1  
2  
3 1 5 times more likely to use prescription drugs than the general population due to easier access  
4  
5 2 or familiarity with prescription drugs, e.g. 24% of US doctors use benzodiazepine and 40%  
6  
7 3 use minor opiates.[5] There are many reasons why doctors use substances – not all of which  
8  
9 4 are to do with being distressed – therefore research is needed to clarify the proportion of  
10  
11 5 doctors who use alcohol/drugs as a way of coping with occupational distress. The coping  
12  
13 6 function of alcohol/drug use among doctors, as with the general population, is plausible  
14  
15 7 because alcohol and many drugs have psychoactive properties, e.g. prescription drugs such as  
16  
17 8 benzodiazepine and opiates; illicit drugs such as LSD. Occupational distress is known to  
18  
19 9 predict alcohol misuse in the general population [8] but little is known about whether, for  
20  
21 10 example, doctors with high levels of burnout are at greater risk of using alcohol or drugs  
22  
23 11 (including prescription or legally purchased drugs), and whether other types of occupational  
24  
25 12 distress (e.g. psychiatric morbidity, negative coping strategies) have similar effects. Little is  
26  
27 13 also known about the impact of other job factors such as work experience on the risk of  
28  
29 14 doctors engaging in substance use.

30  
31  
32  
33  
34  
35  
36  
37  
38  
39  
40  
41  
42  
43  
44  
45  
46  
47  
48  
49  
50  
51  
52  
53  
54 15 *Does occupational distress increase the risk of doctors' binge-eating?*

55  
56  
57  
58  
59  
60  
16 Like alcohol or drug use, binge-eating is more prevalent among workers experiencing  
17 occupational distress [13] but, unlike substance use, little is known about binge-eating rates  
18 among doctors and risk factors. Binge-eating can be defined as eating a larger amount of food  
19 than most people eat in one sitting and finding oneself unable to control ones eating.[14]  
20 Binge-eating, like alcohol or drug use, is a common method of coping with psychological  
21 distress because eating offers an initial sense of comfort.[15,16] The initial comfort is,  
22 however, followed by feelings of shame or guilt, thus exacerbating distress.[16] This is one  
23 of the first studies to assess the prevalence of binge-eating among UK doctors and to offer  
24 insights into whether doctors who binge-eat experience unpleasant emotions after bingeing.  
25 This study will also offer new insights into the impact of different types of occupational  
26 distress (e.g. work-life imbalance) which, together with analysing substance abuse by  
27 doctors, will reveal the consequences of occupational distress for doctors' health-related  
28 behaviours.

29 *Does occupational distress increase the risk of doctors having sleep disturbances?*

30 There have been calls for research into the connection between sleep problems and doctors'  
31 health [17] but most previous studies have focused on sleep deprivation rather than sleep  
32 disturbances that have a psychological aetiology, e.g. trouble falling/staying asleep due to



1 worry. Sleep deprivation can be defined as the lack of the opportunity to sleep, or more  
2 simply as sleeping too few hours each day. Sleep deprivation is associated with  
3 depression,[18,19] burnout,[20] suicide risk,[19] and immunity or cardiovascular health  
4 problems [21] among doctors but sleep deprivation in itself is not necessarily a sign of  
5 psychological distress. Doctors who work long shifts [22] or lack block-scheduled shifts [23]  
6 sleep too few hours because they have no choice. Therefore, rather than measuring sleep  
7 deprivation, this study measured types of sleep disturbance with a psychological aetiology  
8 such as trouble falling asleep, waking up prematurely because of worrying about work, and  
9 insomnia. It is plausible that the risk of these types of sleep disturbance is higher among  
10 doctors suffering from work-life imbalance, psychiatric morbidity, and other types of  
11 occupational distress. This study will evaluate whether UK doctors suffering from  
12 occupational distress have an increased risk of sleep disturbances.

### 13 *Does occupational distress increase the risk of doctors presenting with ill health?*

14 There is some research about the physical health of doctors in some specialties (e.g.  
15 oncology)[6] but research is needed to assess whether occupational distress predicts the risk  
16 of doctors from various specialties suffering from daily or frequent headaches,  
17 gastrointestinal problems, and other physical symptoms. Physical health has a complex range  
18 of causes (e.g. health behaviours, genetics and infections) but people who are distressed are  
19 more susceptible to infections because psychological distress weakens the immune  
20 system.[24] The important question, therefore, is the relative risk of ill health symptoms,  
21 comparing doctors with and without occupational distress. We recognise that the physical  
22 health of doctors is shaped by a complex range of factors – only one of which is occupational  
23 distress – because working in a clinical environment can pose some risk to physical  
24 health.[25] This study is one of the first to shed light on the impact of occupational distress  
25 on ill health symptoms among UK doctors.

### 26 *Study aims*

27 This study aims to assess whether doctors suffering from occupational distress have an  
28 increased risk of (i) using alcohol or drugs (illicit, non-illicit); (ii) binge-eating; (iii) having  
29 sleep disturbances; and (iv) presenting with physical health symptoms. This study will extend  
30 previous literature about occupational distress in medicine, which has focused on burnout and  
31 psychiatric morbidity,[2] by measuring and defining occupational distress in additional ways,  
32 e.g. work-life imbalance, job effort, coping with stress through self-blame or through

1  
2  
3 1 substance use, drawing on previous literature highlighting the multiple dimensions of  
4 2 occupational distress.[6] This study will also provide new insights into the prevalence of  
5 3 alcohol/drug use, binge-eating, sleep and ill health problems among UK doctors, extending  
6 4 previous research about doctors from other countries or individual specialties.[6,7]  
7  
8  
9

## 10 5 11 6 **Method**

### 12 7 13 8 *Patient and public involvement statement*

14 9 All questionnaires were valid, reliable measures selected from previous literature but it was  
15 10 important to consult doctors about whether the types of occupational distress and health  
16 11 problems to be measured were relevant to doctors, and whether the instructions were clear.  
17 12 We thus consulted 15 doctors before the main study, using online software (*Qualtrics*). The  
18 13 pilot study sought the doctors' feedback (through open ended questions) about the relevance  
19 14 and clarity of the questionnaires. Doctors gave generally positive feedback. Some minor  
20 15 amendments included revising the wording of demographic questions, questionnaire  
21 16 instructions and reducing the number of questionnaires to eliminate similar measures.  
22  
23  
24  
25  
26  
27  
28  
29  
30  
31  
32

### 33 17 34 18 *Study design*

35 19 The research reported in this article is an analysis of data collected at the baseline stage of a  
36 20 randomised controlled trial (protocol #NCT02838290) of the effect of an intervention on  
37 21 doctors' levels of occupational distress and health problems. The trial took place from July to  
38 22 November 2016. Due to the complexity of the trial this paper reports a cross-sectional  
39 23 analysis of the baseline data.  
40  
41  
42  
43  
44

### 45 24 46 25 *Participants and study size*

47 26 Doctors took part in this study online (*Qualtrics*). They learnt about the study through  
48 27 medical Royal Colleges, NHS trusts, and the British Medical Association (BMA). To prevent  
49 28 selection bias based on specialty, we invited all Royal Colleges from which 9 agreed to  
50 29 distribute information about the research to their members. To prevent selection bias due to  
51 30 an NHS trust's reputation we randomly selected 25% NHS trusts. From the ones possible to  
52 31 reach, 9 distributed invitations to this study. The third source of data was the BMA's research  
53 32 panel. The majority of UK medical doctors are members of the BMA and any of them can  
54 33 join the BMA's research panel; therefore, this panel represented a broad spectrum of doctors.  
55 34 All medical doctors working in the UK were included in the baseline data analysis.  
56  
57  
58  
59  
60

## 1 Measures

2 *Outcome measures:* Doctors completed a variety of questionnaires assessing health problems.  
3 In some cases, we analysed responses to individual items in addition to the average of whole  
4 questionnaires because this offered richer insights into the prevalence of certain types of  
5 substance misuse (e.g. binge-drinking), different symptoms of ill health (e.g. backache),  
6 different signs of binge-eating (e.g. uncontrollable eating) and sleep disturbances (e.g. trouble  
7 falling asleep). This also enabled a better understanding of what aspects of health problems  
8 are predicted by occupational distress.

- 9 1. *Alcohol and drug use:* Alcohol dependence was assessed with the Patient Health  
10 Questionnaire [26] and the alcohol use habits with 3 items from the Alcohol Use  
11 Disorder Identification Scale (AUDIT).[27] Two items from the Brief COPE  
12 questionnaire [28] evaluated doctors' tendency to use substances as a stress coping  
13 strategy. Drug use list of 22 illicit and legal drugs was devised from the Commonly  
14 Abused Drugs Charts [29] and the UK drug misuse declaration.[30]
- 15 2. *Binge-eating habits:* These were measured using the binge-eating disorder items from  
16 the Eating Disorder Diagnostic Scale (as a scale and separate items).[31]
- 17 3. *Sleep disturbances:* Insomnia was measured with the Insomnia Severity Index (ISI;  
18 Cronbach  $\alpha=0.891$ ).[32] Sleep problems were items derived from the Effort-Reward  
19 scale [33] and ISI.[32]
- 20 4. *Ill health symptoms:* The Physical Symptom Inventory [34] comprising 12 items was  
21 used to assess the frequency with which doctors experienced various symptoms.

22  
23 *Predictor measures:* The predictor variables and measuring instruments captured different  
24 types of occupational distress and job factors:

- 25  
26 1. *Psychiatric morbidity:* This was measured using the General Health Questionnaire-12  
27 (GHQ-12; Cronbach  $\alpha=0.927$ ).[35] This measure of psychiatric morbidity was chosen  
28 instead of others (e.g. Patient Health Questionnaire) because GHQ-12 was previously  
29 extensively used to examine working populations (e.g.[3]), including doctors (e.g.[6]).
- 30 2. *Burnout:* Emotional exhaustion from the Maslach Burnout Inventory (MBI) [36] was  
31 assessed in this study (Cronbach  $\alpha=0.905$ ). Emotional exhaustion was selected  
32 because previous research shows that it is the best predictor of stress-related health  
33 among the three dimensions.[37]

- 1 3. *Job effort*: The Job Effort scale from the Effort-Reward scale [33] measured time  
2 pressure, interruptions and demands at work (Cronbach  $\alpha=0.770$ ).
- 3 4. *Work-life imbalance*: This was measured using the Work-Family Conflict scale [38]  
4 (Cronbach  $\alpha=0.934$ ).
- 5 5. *Maladaptive coping strategies*: Two scales from the Brief COPE questionnaire [28]  
6 were used: coping through substance use (Cronbach  $\alpha=0.872$ ), and coping through  
7 self-blame (Cronbach  $\alpha=0.783$ ).
- 8 6. *Work experience*: years working in medicine.
- 9 7. *Work place type*: doctors indicated whether they work in a hospital or other setting.

10  
11 More information about the measures is presented in Table 1.

12  
13 [Insert Table 1]

#### 14 15 *Statistical methods*

16 Outcome variables were re-coded into binary variables in order to distinguish between the  
17 presence and absence of a health problem and to identify factors that raise the risk of the  
18 symptom being present. The cut-off points where possible were identified from the literature  
19 (see citations within Table 1). For sleep problems, we determined the cut-off points based on  
20 the guidance for the ISI.[32] For each item doctors reporting moderate or severe sleep  
21 problems were noted as having the symptom present, and reporting no/mild sleep problems  
22 were noted as having the symptom absent. Doctors' responses about using substances to cope  
23 with stress were dichotomised as either not doing so, or using substances a little bit, to a  
24 medium extent or a lot. Frequency of drinking was divided into drinking alcohol less than 2-3  
25 times a week and more than 2-3 times a week. Ill health symptoms were recoded such that the  
26 presence of each symptom meant experiencing once/twice per week or more often. See Table  
27 1 for more details. Logistic regression tested the impact of predictors on the odds of the  
28 outcomes using SPSS v21 software.

## 29 30 **Results**

31  
32 In total, 417 UK doctors participated. The mean age was 47.23 years (SD=10.97), and there  
33 was an equivalent split of gender (48% males) and seniority (49% consultants). We compared  
34 demographic characteristics of doctors in this study to doctors on the List of Registered

1 Medical Practitioners (LRMP)[39,40] and the comparison showed that the current sample  
2 largely mirrors the demographics of UK medical doctors in terms of the proportion of doctors  
3 by gender, age, grade and specialty, except that there was a higher representation of  
4 consultants and public health doctors than the proportions within the LRMP (Table 2).

5  
6 Table 1 shows the prevalence and descriptive statistics of different types of occupational  
7 distress; for example, 32.7% of doctors had psychiatric morbidity and 55.3% were  
8 emotionally exhausted.

9  
10 [Insert Table 2]

11  
12 *How many doctors use alcohol or drugs?* Table 1 shows that 53% of doctors drank alcohol  
13  $\geq 2$  times a week, 27% consumed  $\geq 3$  drinks on a typical day of drinking and 44% binge-drank  
14 by consuming 6+ drinks on one occasion. 5% of doctors met the criteria for alcohol  
15 dependence but the rest of doctors did not report significant impairments in their occupational  
16 or other functioning as a result of drinking alcohol. In terms of illicit/non-illicit drug use,  
17 44% of doctors used some type of drugs but almost all were non-illicit drugs: 3% of doctors  
18 used prescription opioids, 2% used benzodiazepines, 5% used sleep medication, 5% smoked  
19 tobacco, 7% used herbal or homeopathic remedies and 35% used over-the-counter medicines.  
20 Illegal drug use was rare: only 1 doctor reported cocaine use and 1 doctor used amyl nitrite.  
21 No doctor reported using amphetamines, anabolic steroids, cannabis, ecstasy, heroin,  
22 ketamine, khat, LSD, magic mushrooms, mephedrone, methadone, methamphetamine or  
23 tranquillizers.

24  
25 *Are distressed doctors more likely to use alcohol/drugs?* Coping with stress was the reason  
26 given by many doctors for drinking alcohol or taking drugs, with 34% saying that they used  
27 substances in order to feel better, and 22% used substances to help them get through stressful  
28 events. Table 3 shows logistic regression results analysing the effects of occupational distress  
29 and job factors on alcohol and drug use. The model significance testing shows that the  
30 predictors significantly explained variance in doctors using substances to help them get  
31 through something (6%), drinking alcohol frequently (38%) and large amounts (12%), binge-  
32 drinking (28%), and being alcohol dependent (28%). The predictors did not explain variance  
33 in drug use and doctors using substances to feel better ( $p > 0.05$ ). Doctors who coped with  
34 stress by using substances had a higher risk of frequent alcohol use, binge-drinking, alcohol

1 dependence and drug use ( $p \leq 0.022$ ). The results also show that having more experience  
2 working in medicine raised the risk of a doctor drinking alcohol frequently ( $OR = 1.036$ ;  
3  $p = 0.002$ ) but lowered the risk of binge-drinking ( $OR = 0.970$ ;  $p = 0.007$ ). Doctors who worked  
4 in a hospital were more likely to drink high amounts of alcohol on a typical day of drinking  
5 and to binge-drink ( $OR \geq 1.672$ ;  $p \leq 0.044$ ). Doctors who reacted to stress by blaming  
6 themselves were more likely to use substances to get through something ( $OR = 1.374$ ;  
7  $p = 0.039$ ). Burnout, work-life imbalance and job effort were not significant unique predictors  
8 of substance use although the combined models were significant. The exception was  
9 psychiatric morbidity which had a significant unique effect of decreasing the risk of doctors  
10 drinking alcohol frequently ( $OR = 0.478$ ;  $p = 0.019$ ).

11  
12 [Insert Table 3]

13  
14 *How many doctors binge-eat?* Table 1 shows that 35% of doctors ate a large amount of food  
15 when they were not physically hungry, 31% ate until they felt uncomfortably full, and 24-  
16 29% of doctors experienced negative emotions after overeating such as embarrassment,  
17 disgust, depression or guilt. We found that 8% of doctors had a binge-eating disorder.

18  
19 *Are distressed doctors more likely to binge-eat?* Table 4 shows that all models tested were  
20 statistically significant and the predictors explained 8.1-17.1% of variance in binge-eating  
21 habits ( $p < 0.05$ ). Types of occupational distress that, individually, significantly predicted  
22 binge-eating habits were: self-blaming, work-life imbalance, and burnout. More experienced  
23 doctors were less likely to feel disgusted with themselves after binge-eating ( $OR = 0.966$ ;  
24  $p = 0.009$ ), as were doctors who worked in hospitals ( $OR = 0.453$ ;  $p = 0.008$ ). Job effort lowered  
25 the risk of a binge-eating disorder ( $OR = 0.179$ ;  $p < 0.001$ ). Psychiatric morbidity, by itself, did  
26 not predict binge-eating, and nor did coping with stress through substance use ( $p > 0.05$ ).

27  
28 [Insert Table 4]

29  
30 *How many doctors have sleep disturbances?* Table 1 shows that 22% of doctors had  
31 difficulty falling asleep, 35% difficulty staying asleep, 44% were dissatisfied with their sleep  
32 pattern, 20% were worried or distressed about a current sleep problem, and 35% of doctors'  
33 sleep problems interfered with daily functioning. Thinking about work contributed to sleep  
34 problems; 61% of doctors thought about work when they went to bed and 49% had trouble

1 sleeping if they postponed something they were supposed to do that day. The ISI [32] showed  
2 that 12% of doctors had severe/moderate insomnia.

3  
4 *Are distressed doctors more likely to have sleep disturbances?* Logistic regression models  
5 predicting 7 signs of sleep problems and insomnia are presented in Table 5. All models were  
6 statistically significant explaining from 23.4% to 39.1% of variance, showing that  
7 occupational distress and job factors significantly predicted sleep disturbances among  
8 doctors. Doctors with psychiatric morbidity were more likely to have insomnia, difficulty  
9 falling/staying asleep, think about work when they went to bed, find that sleep problems  
10 interfered with their daily functioning ( $OR \geq 2.117$ ;  $p \leq 0.026$ ), and burnout increased the risk  
11 of all 7 sleep disturbances ( $OR \geq 1.344$ ;  $p \leq 0.036$ ). Other significant unique predictors of sleep  
12 problems among doctors were: maladaptive coping with stress, work-life imbalance, and  
13 working in a hospital ( $p \leq 0.030$ ).

14  
15 [Insert Table 5]

16  
17 *How many doctors suffer from daily or frequent ill health?* 69% of doctors had fatigue and  
18 between 19% and 29% frequently experienced other type of ill health problems, e.g. upset  
19 stomach, backache and headaches. Only 8% or fewer doctors reported frequent  
20 (daily/weekly) non-menstrual stomach cramps, constipation, appetite loss and dizziness,  
21 therefore these symptoms were not analysed using logistic regression.

22  
23 *Are distressed doctors more likely to have daily or frequent ill health?* Table 6 shows the  
24 logistic regression results that the odds of doctors suffering from frequent ill health are raised  
25 by occupational distress together with years practising medicine and working in a hospital.  
26 The predictors explained 8-35.2% of variance in doctors presenting with ill health symptoms;  
27 only the effects on back pain were non-significant ( $p = 0.083$ ). Several types of occupational  
28 distress had significant unique effects, meaning that they individually predicted doctors'  
29 health. For instance, burnout raised the odds of doctors suffering from fatigue ( $OR = 1.804$ ;  
30  $p < 0.001$ ); job effort raised the odds of headaches ( $OR = 1.905$ ;  $p = 0.030$ ); work-life imbalance  
31 raised the odds of diarrhoea ( $OR = 1.717$ ;  $p = 0.005$ ); and psychiatric morbidity raised the odds  
32 of doctors suffering from fatigue, upset stomach or nausea, headaches,  
33 acid/indigestion/heartburn, and eye strain ( $OR \geq 1.930$ ;  $p \leq 0.017$ ). Working in a hospital did  
34 not, by itself, predict doctors' presentation of ill health symptoms, and nor did using

1 substances to cope with stress ( $p>0.05$ ). More years of experience in medicine decreased the  
2 odds of doctors having fatigue, upset stomach or nausea and headaches ( $OR\geq 0.963$ ;  
3  $p\leq 0.024$ ), but more experienced doctors had increased odds of ear ringing ( $OR=1.050$ ;  
4  $p=0.002$ ).

5  
6 [Insert Table 6]

## 7 8 **Discussion**

### 9 10 *Prevalence of occupational distress and health problems among UK doctors*

11 This study shows the prevalence of occupational distress and health problems such as ill  
12 health symptoms, and health-related problems (e.g. substance use) among UK doctors. The  
13 results replicate a recent systematic review about the prevalence of burnout and psychiatric  
14 morbidity [2] by finding that 32.7% of UK doctors have psychiatric morbidity and 55.3% a  
15 type of burnout called emotional exhaustion while providing new evidence about the  
16 prevalence of types of problems that were unrepresented in previous literature. The results  
17 showed that 11% of doctors have insomnia; 20-61% experience various sleep problems; 5%  
18 are alcohol dependent; 27-53% drink in a hazardous way; 69% have fatigue; 4-33%  
19 experience other physical complaints; 8% have a binge-eating disorder; and 24-35%  
20 experience binge-eating symptoms. 44% of doctors use some type of drugs, but mostly over-  
21 the-counter medications (35%). Prescription drug use was rare (3% use opioids and 2% use  
22 benzodiazepines), suggesting that the proportion of doctors getting drug treatment for anxiety  
23 is lower than the proportion of doctors with anxiety (14.7%).[41] Compared to the general  
24 population more doctors have psychiatric morbidity (32.7% compared 19%),[3] burnout  
25 (55.3% compared to 24.8%),[42] and more doctors have physical complaints such as back  
26 pain (e.g. 34% compared to 8-28% in the general population).[43] However, fewer doctors  
27 have insomnia (11%) or are alcohol dependent (5%) compared to the general population  
28 whereby 37% have insomnia and 13.9-29.1% have alcohol use disorder.[44] The results from  
29 this study also revealed a higher prevalence of burnout than the National Trainee Survey  
30 (NTS) which reported that 23.8% of medical trainees have burnout [45] but this could be  
31 because the current study had a high representation of consultants (49%). The current study  
32 supports the recent BMA annual survey reporting that 61% of doctors feel that their stress  
33 levels have increased over the last year [46] by showing that a similar proportion of doctors  
34 (55.3%) have a type of burnout called emotional exhaustion.



1  
2  
3 1 *Occupational distress increases the odds of health problems among UK doctors*

4  
5 2 The results show that occupational distress increases the odds of doctors using substances,  
6  
7 3 having sleep disturbances, frequent symptoms of ill health, and binge-eating. Even taking  
8  
9 4 into consideration whether or not a doctor works in a hospital, the risk of health problems still  
10  
11 5 rises when doctors have signs of occupational distress such as burnout. Previous research  
12  
13 6 showed that distress,[8,47] coping strategies [48–50] and job factors [51–56] are associated  
14  
15 7 with health problems. This study replicates previous findings while demonstrating the  
16  
17 8 generalisability of the effects to a wider range of health issues among UK doctors from  
18  
19 9 various specialties:

20  
21 11 *Alcohol/drug use:* Distressed doctors are more likely to use alcohol, with 22-34% of  
22  
23 12 doctors reporting that they use substances to feel better or help them get through  
24  
25 13 stressful events. Doctors who cope with stress by using substances have a higher risk of  
26  
27 14 alcohol dependence (OR=6.165), binge-drinking (OR=6.355), drinking larger amounts  
28  
29 15 of alcohol (OR=2.599), and a higher risk of using alcohol more frequently  
30  
31 16 (OR=18.836). Doctors who react to stress by blaming themselves are more likely to use  
32  
33 17 substances to get through something (OR=1.374). Having more experience working in  
34  
35 18 medicine makes a doctor more likely to drink alcohol frequently (OR=1.036) but  
36  
37 19 lowers the likelihood of binge-drinking (OR=0.970). Doctors who work in a hospital  
38  
39 20 are more likely to drink high amounts of alcohol on a typical day of drinking  
40  
41 21 (OR=1.812) and to binge-drink (OR=1.672). In understanding the effects of  
42  
43 22 occupational distress on alcohol or drug use, the results showed the usefulness of  
44  
45 23 assessing the combined effects of different types of occupational distress, but that,  
46  
47 24 except for psychiatric morbidity, burnout, work-life imbalance and job effort do not  
48  
49 25 individually predict alcohol use. This suggests that occupational distress is best  
50  
51 26 understood as a syndrome when understanding its effect on alcohol use. These findings  
52  
53 27 extend previous studies which show that burnout, depression and psychiatric morbidity  
54  
55 28 individually predict using alcohol dependence/abuse.[7,57] The results also show that –  
56  
57 29 for UK doctors – occupational distress as a syndrome has no significant effect on legal  
58  
59 30 or illegal drug use. Only doctors who cite substance use as a strategy that they use to  
60  
31 cope with stress are significantly more likely to use drugs (OR=1.530) – and most of  
32  
33 these are prescription or over-the-counter drugs.

1  
2  
3 1 *Binge-eating:* The risks of doctors binge-eating and experiencing negative emotions  
4 after over-eating are raised by occupational distress (OR=1.311 to 1.841), e.g. burnout,  
5 2 coping with stress by blaming oneself, and work-life imbalance. This supports previous  
6 3 studies showing that binge-eating is a method of coping with stress that offers people  
7 4 an initial sense of comfort.[15,16] Doctors who have longer experience working in  
8 5 medicine, and doctors who work in hospitals, are less likely to have unpleasant  
9 6 emotions after binge-eating (OR=0.966 and 0.453), suggesting that community-based  
10 7 doctors are more at risk of finding that binge-eating makes them feel worse, rather than  
11 8 better. The amount of effort that a doctor puts into their job lowers the risk of their  
12 9 suffering from a binge-eating disorder (OR=0.187). Psychiatric morbidity, by itself, did  
13 10 not predict binge-eating, and nor did coping with stress through substance use.  
14 11  
15 12

16 13 *Sleep disturbances:* Occupational distress and job factors significantly predict sleep  
17 14 problems and insomnia among doctors, supporting the view of occupational distress as  
18 15 a syndrome, whilst also revealing that certain types of occupational distress can also,  
19 16 individually, predict sleep disturbances. Previous research show that physicians with  
20 17 high burnout, for example, are more likely to experience sleep related problems.[58]  
21 18 This study extends our understanding of the risk factors and shows that burnout,  
22 19 psychiatric morbidity, maladaptive coping strategies, work-life imbalance, and working  
23 20 in a hospital increase the risk of sleep disturbances (OR=1.344 to 3.826). This means  
24 21 that the risk of sleep problems or insomnia exists even if doctors are suffering from just  
25 22 one of these types of occupational distress which is particularly noticeable with the  
26 23 increase in psychiatric morbidity. The sleep problems doctors experience include  
27 24 trouble falling/staying sleep, worrying about work when trying to sleep, and finding  
28 25 that sleep problems interfere with daily functioning.  
29 26  
30 27

31 28 *Daily or frequent ill health:* Occupational distress increases the odds of doctors  
32 29 suffering from fatigue, upset stomach or nausea, headaches, acid/indigestion or  
33 30 heartburn, eye strain, diarrhoea, and ringing in the ears but not back pain. Psychiatric  
34 31 morbidity, burnout, coping with stress by blaming oneself, job effort, and work-life  
35 32 imbalance each, as individual predictors, also raise the odds of doctors suffering from  
36 33 frequent ill health (OR=1.050 to 3.544). These findings extend previous studies which  
37 34 investigate how the working conditions experienced by doctors relate to ill health [25]  
38 by showing that occupational distress, especially psychiatric morbidity, increases the

1 risk of physical health problems. Doctors who work in a hospital do not have increased  
2 odds of ill health symptoms, and nor do doctors who use substances to cope with stress.  
3 More experienced doctors have lower odds of fatigue , upset stomach or nausea and  
4 headaches (OR=0.963 to 0.972), but are at a greater risk of suffering from ringing ears  
5 (OR=1.050).

### 6 7 *Strengths and weaknesses of the study and future research*

8 This study is the first to explore the impact of occupational distress and work factors on the  
9 risk of health problems among UK doctors from various specialties. A weakness of this study  
10 is that the analysis is cross-sectional. We need future experimental research to test causation  
11 between occupational distress and health problems using a longitudinal design, and an  
12 evaluation of effect sizes using indicators such as Cohen's *d*. It was not possible to reliably  
13 convert odds ratios into Cohen's *d* within the current study because of the limitations of  
14 interpreting Cohen's *d* from data with dichotomous outcome variables. We also encourage  
15 future research to measure hypotheses that were not possible to test within the current study,  
16 e.g. whether the risk of gastrointestinal problems among doctors rises with patient caseload or  
17 infection exposure.

18  
19 It was not possible to calculate the response rate because it was not clear whether all NHS  
20 trusts and medical Royal Colleges who agreed to take part in this study actually distributed  
21 the invitation and to how many doctors. We are also mindful that some participants might not  
22 have been comfortable answering some sensitive questions (e.g. about illicit drug or alcohol  
23 use) but the risk of response bias was mitigated by allowing doctors to complete confidential  
24 self-reported questionnaires. This is a recognised methods of measuring health and health-  
25 related behaviours (e.g. alcohol intake [59]). We also recognise that using individual items  
26 from previously validated questionnaires (rather than all items) might have an impact on the  
27 validity and reliability of the measurement methods.

### 28 29 *The meaning of the study: possible implications for clinicians and policymakers*

30 Occupational distress among doctors has a detrimental effect on the quality of care and  
31 patient safety.[1] This study has revealed that occupational distress also increases the risk of  
32 doctors suffering from health problems (OR=1.036 to 18.836). The impact of occupational  
33 distress on ill health could increase levels of sickness-absence among doctors, thus reducing  
34 patient safety because of under-staffing. Likewise, the impact of occupational distress on

1  
2  
3 1 substance use and sleep problems could mean that distress indirectly impairs doctors' fitness  
4 2 to practice, judgement or decision-making because of being intoxicated, hung-over or having  
5 3 disturbed sleep. Therefore, we recommend that doctors' mentors, supervisors, peers and  
6 4 occupational health support services recognise and act upon (1) the prevalence of  
7 5 occupational distress and health problems among doctors; (2) the possibility that occupational  
8 6 distress raises the risk of several health problems; and (3) the need to provide early  
9 7 interventions that prevent doctors who are experiencing occupational distress from suffering  
10 8 the long-term health effects of sleep disturbances, frequent symptoms of ill health, and  
11 9 adopting negative health behaviours, such as binge-drinking or eating in order to cope.  
12  
13  
14  
15  
16  
17  
18  
19  
20

### 21 *Acknowledgements*

22 We are extremely grateful to all the doctors who kindly agreed to take part in this study and  
23 the organisations who helped us to reach their doctors.  
24  
25  
26

### 27 *Ethical approval and consent to participate*

28 The BEI School Ethics Committee at Birkbeck, University of London, approved the study in  
29 May 2016. Participants voluntarily consented to take part in this study.  
30  
31  
32  
33

### 34 *Competing interests*

35 The authors declare that they have no competing interests.  
36  
37  
38

### 39 *Funding*

40 Not applicable  
41  
42  
43

### 44 *Authors' contributions*

45 AM and CK participated in the conception and design of the study. AM collected and  
46 analysed data. AM and CK were involved in the interpretation of the data and preparation of  
47 this article. Both authors read and approved the final manuscript.  
48  
49  
50  
51

### 52 *Data sharing*

53 No additional data available  
54  
55  
56  
57  
58  
59  
60

1  
2  
3  
4  
5  
6  
7  
8  
9  
10  
11  
12  
13  
14  
15  
16  
17  
18  
19  
20  
21  
22  
23  
24  
25  
26  
27  
28  
29  
30  
31  
32  
33  
34  
35  
36  
37  
38  
39  
40  
41  
42  
43  
44  
45  
46  
47  
48  
49  
50  
51  
52  
53  
54  
55  
56  
57  
58  
59  
60  
**1 References**

- 2 1 Panagioti M, Geraghty K, Johnson J, *et al.* Association between physician burnout and patient safety, professionalism, and patient satisfaction: A systematic review and meta-analysis. *JAMA Intern Med* 2018;**178**:1317–30. doi:10.1001/jamainternmed.2018.3713
- 5 2 Imo UO. Burnout and psychiatric morbidity among doctors in the UK: a systematic literature review of prevalence and associated factors. *BJPsych Bull* Published Online First: 2017. doi:10.1192/pb.bp.116.054247
- 8 3 Goodwin L, Ben-Zion I, Fear NT, *et al.* Are reports of psychological stress higher in occupational studies? A systematic review across occupational and population based studies. *PLoS One* 2013;**8**. doi:10.1371/journal.pone.0078693
- 11 4 Medisauskaite A, Kamau C. Prevalence of oncologists in distress: Systematic review and meta-analysis. *Psychooncology* 2017;**26**:1732–40. doi:10.1002/pon.4382
- 13 5 Hughes, H. P, Brandenburg, C. N, Baldwin, L. D, *et al.* Prevalence of Substance Use Among US Physicians. *JAMA* 1992;**47**:771–3.
- 15 6 Medisauskaite A, Kamau C. Prevalence of oncologists in distress: Systematic review and meta-analysis. *Psychooncology* Published Online First: 2017. doi:10.1002/pon.4382
- 18 7 Oreskovich MR, Kaups KL, Balch CM, *et al.* Prevalence of Alcohol Use Disorders Among American Surgeons. *Arch Surg* 2012;**147**:168. doi:10.1001/archsurg.2011.1481
- 21 8 Ahola K, Honkonen T, Pirkola S, *et al.* Alcohol dependence in relation to burnout among the Finnish working population. *Addiction* 2006;**101**:1438–43. doi:10.1111/j.1360-0443.2006.01539.x
- 24 9 Leiter MP, Hakanen JJ, Ahola K, *et al.* Organizational predictors and health consequences of changes in burnout: A 12-year cohort study. *J Organ Behav* 2012;:n/a-n/a. doi:10.1002/job.1830
- 27 10 Merlo LJ, Gold MS. Prescription opioid abuse and dependence among physicians: Hypotheses and treatment. *Harv Rev Psychiatry* 2008;**16**:181–94. doi:10.1080/10673220802160316
- 30 11 NHS. Alcohol misuse - NHS. <https://www.nhs.uk/conditions/alcohol-misuse/> (accessed 26 Sep 2018).
- 32 12 NHS. Binge drinking - NHS. <https://www.nhs.uk/live-well/alcohol-support/binge-drinking-effects/> (accessed 26 Sep 2018).
- 34 13 Pena Gralle APB, Barbosa Moreno A, Lopes Juvanhol L, *et al.* Job strain and binge eating among Brazilian workers participating in the ELSA-Brasil study: does BMI matter? *J Occup Health* 2017;**59**:247–55. doi:10.1539/joh.16-0157-OA
- 37 14 Waller D. Binge eating. *BMJ* 2001;**322**:343. doi:10.1136/BMJ.322.7282.343
- 38 15 Macht M, Simons G. Emotions and eating in everyday life. *Appetite* 2000;**35**:65–71. doi:10.1006/appe.2000.0325

- 1  
2  
3 1 16 McManus F, Waller Gi. A functional analysis of binge-eating. *Clin Psychol Rev*  
4 2 1995;**15**:845–63. doi:10.1016/0272-7358(95)00042-9  
5
- 6 3 17 Kamau C. Safe working hours protect doctors from sleep deprivation. *BMJ rapid*  
7 4 *response* 2017;;j4547. doi:10.1136/bmj.j4547  
8
- 9 5 18 Kalmbach DA, Arnedt JT, Song PX, *et al.* Sleep Disturbance and Short Sleep as Risk  
10 6 Factors for Depression and Perceived Medical Errors in First-Year Residents. *Sleep*  
11 7 2017;**40**. doi:10.1093/sleep/zsw073  
12
- 13 8 19 Eddy R. Sleep deprivation among physicians. *B C Med J* 2005;**47**:176–80.  
14
- 15 9 20 Aldrees TM, Aleissa S, Zamakhshary M, *et al.* Physician well-being: Prevalence of  
16 10 burnout and associated risk factors in a tertiary hospital, Riyadh, Saudi Arabia. *Ann*  
17 11 *Saudi Med* 2013;**33**:451–6. doi:10.5144/0256-4947.2013.451  
18
- 19 12 21 Tobaldini E, Cogliati C, Fiorelli EM, *et al.* One night on-call: Sleep deprivation affects  
20 13 cardiac autonomic control and inflammation in physicians. *Eur J Intern Med*  
21 14 2013;**24**:664–70. doi:10.1016/j.ejim.2013.03.011  
22
- 23 15 22 Anderson C, Sullivan JP, Flynn-Evans EE, *et al.* Deterioration of Neurobehavioral  
24 16 Performance in Resident Physicians During Repeated Exposure to Extended Duration  
25 17 Work Shifts. *Sleep* 2012;**35**:1137–46. doi:10.5665/sleep.2004  
26
- 27 18 23 Bordley J, Agustin AG, Ahmed MA, *et al.* Restoration of resident sleep and wellness  
28 19 with block scheduling. *Med Educ* 2017;**51**:1241–9. doi:10.1111/medu.13392  
29
- 30 20 24 Cohen S, Williamson GM. Stress and infectious disease in humans. *Psychol Bull*  
31 21 1991;**109**:5–24. doi:10.1037//0033-2909.109.1.5  
32
- 33 22 25 Vijendren A, Yung M, Sanchez J. Occupational health issues amongst UK doctors: A  
34 23 literature review. *Occup Med (Chic Ill)* 2015;**65**:519–28. doi:10.1093/occmed/kqv088  
35
- 36 24 26 Spitzer RL, Williams JBW, Kroenke K, *et al.* Validity and utility of the PRIME-MD  
37 25 Patient Health Questionnaire in assessment of 3000 obstetric-gynecologic patients:  
38 26 The PRIME-MD Patient Health Questionnaire Obstetrics-Gynecology Study. *Am J*  
39 27 *Obstet Gynecol* 2000;**183**:759–69. doi:10.1067/mob.2000.106580  
40
- 41 28 27 Babor TF, Higgins-Biddle JC, Saunders JB, *et al.* The Alcohol Use Disorders  
42 29 Identification Test Guidelines for Use in Primary Care. *World Heal Organ* 2001;;pp1-  
43 30 40. doi:10.1177/0269881110393051  
44
- 45 31 28 Carver CS. You want to measure coping but your protocol's too long: Consider the  
46 32 Brief COPE. *Int. J. Behav. Med.* 1997;**4**:92–100. doi:10.1207/s15327558ijbm0401\_6  
47
- 48 33 29 National Institute on Drug Abuse (NIDA). Commonly Abused Drugs Charts.  
49 34 2016.<https://www.drugabuse.gov/drugs-abuse/commonly-abused-drugs-charts>  
50 35 (accessed 16 Jan 2016).  
51
- 52 36 30 Office for National Statistics. User Guide to Drug Misuse Statistics Contents. 2015.  
53 37  
54 38  
55 39 Stice E, Telch CF, Rizvi SL. Development and validation of the Eating Disorder  
56 37 Diagnostic Scale: a brief self-report measure of anorexia, bulimia, and binge-eating  
57 38 disorder. *Psychol Assess* 2000;**12**:123–31. doi:10.1037/1040-3590.12.2.123  
58  
59  
60

- 1  
2  
3 1 32 Bastien CH, Vallières A, Morin CM. Validation of the insomnia severity index as an  
4 2 outcome measure for insomnia research. *Sleep Med* 2001;**2**:297–307.  
5 3 doi:10.1016/S1389-9457(00)00065-4  
6  
7 4 33 Siegrist J, Li J, Montano D. Psychometric properties of the effort-reward imbalance  
8 5 questionnaire. Germany: 2014. [http://www.uniklinik-](http://www.uniklinik-duesseldorf.de/fileadmin/Datenpool/einrichtungen/institut_fuer_medizinische_soziologie_id54/ERI/Psychometrie.pdf)  
9 6 [duesseldorf.de/fileadmin/Datenpool/einrichtungen/institut\\_fuer\\_medizinische\\_soziolo-](http://www.uniklinik-duesseldorf.de/fileadmin/Datenpool/einrichtungen/institut_fuer_medizinische_soziologie_id54/ERI/Psychometrie.pdf)  
10 7 [gie\\_id54/ERI/Psychometrie.pdf](http://www.uniklinik-duesseldorf.de/fileadmin/Datenpool/einrichtungen/institut_fuer_medizinische_soziologie_id54/ERI/Psychometrie.pdf)  
11  
12  
13 8 34 Spector PE, Jex SM. Development of Four Self-Report Measures of Job Stressors and  
14 9 Strain: Interpersonal Conflict at Work Scale, Organizational Constraints Scale,  
15 10 Quantitative Workload Inventory, and Physical Symptoms Inventory. *J Occup Health*  
16 11 *Psychol* 1998;**3**:356–67.  
17  
18 12 35 Goldberg DP, Hillier VF. A scaled version of the General Health Questionnaire.  
19 13 *Psychol Med* 1979;**9**:139–45. doi:10.1017/S0033291700021644  
20  
21 14 36 Maslach C, Jackson S. The measurement of experienced Burnout. *J Occup Behav*  
22 15 1981;**2**:99–113. doi:10.1002/job.4030020205  
23  
24 16 37 Maslach C, Leiter MP. Understanding the burnout experience: recent research and its  
25 17 implications for psychiatry. *World Psychiatry* 2016;**15**:103–11.  
26 18 doi:10.1002/wps.20311  
27  
28 19 38 Netemeyer RG, Boles JS, McMurrian R. Development and Validation of Work-Family  
29 20 Conflict and Family-Work Conflict Scales. *J Appl Psychol* 1996;**81**:400–10.  
30  
31 21 39 General Medical Council. *The state of medical education and practice in the UK*.  
32 22 2017. doi:10.1017/CBO9781107415324.004  
33  
34 23 40 General Medical Council. Data Explorer. [https://data.gmc-](https://data.gmc-uk.org/gmcdata/home/#/reports)  
35 24 [uk.org/gmcdata/home/#/reports](https://data.gmc-uk.org/gmcdata/home/#/reports) (accessed 24 Nov 2018).  
36  
37 25 41 Johansson R, Carlbring P, Heedman Åsa, *et al*. Depression, anxiety and their  
38 26 comorbidity in the Swedish general population: point prevalence and the effect on  
39 27 health-related quality of life. *PeerJ* 2013;**1**:e98. doi:10.7717/peerj.98  
40  
41 28 42 Shanafelt TD, Hasan O, Dyrbye LN, *et al*. Changes in Burnout and Satisfaction with  
42 29 Work-Life Balance in Physicians and the General US Working Population between  
43 30 2011 and 2014. *Mayo Clin Proc* 2015;**90**:1600–13. doi:10.1016/j.mayocp.2015.08.023  
44  
45 31 43 Health & Safety Executive. The role of work stress and psychological factors in the  
46 32 development of musculoskeletal disorders. 2004.  
47 33 <http://www.hse.gov.uk/research/rrpdf/rr273.pdf> (accessed 5 May 2018).  
48  
49 34 44 Grant BF, Goldstein RB, Saha TD, *et al*. Epidemiology of DSM-5 Alcohol Use  
50 35 Disorder. *JAMA Psychiatry* 2015;**72**:757. doi:10.1001/jamapsychiatry.2015.0584  
51  
52 36 45 General Medical Council. National training surveys 2018: Initial findings report.  
53 37 2018;:1–16.[https://www.gmc-uk.org/-/media/documents/dc11391-nts-2018-initial-](https://www.gmc-uk.org/-/media/documents/dc11391-nts-2018-initial-findings-report_pdf-75268532.pdf)  
54 38 [findings-report\\_pdf-75268532.pdf](https://www.gmc-uk.org/-/media/documents/dc11391-nts-2018-initial-findings-report_pdf-75268532.pdf)  
55  
56 39 46 BMA. BMA quarterly tracker survey. *BMA Surv* Published Online First:  
57 40 2017.<http://bma.org.uk/working-for-change/policy-and-lobbying/training-and->

- 1  
2  
3 1 workforce/tracker-survey/omnibus-august-survey-2014  
4  
5 2 47 Davey MM, Cummings G, Newburn-Cook C V., *et al.* Predictors of nurse absenteeism  
6 3 in hospitals: A systematic review. *J Nurs Manag* 2009;**17**:312–30. doi:10.1111/j.1365-  
7 4 2834.2008.00958.x  
8  
9 5 48 Kataoka M, Ozawa K, Tomotake M, *et al.* Occupational stress and its related factors  
10 6 among university teachers in Japan. *Health (Irvine Calif)* 2014;**06**:299–305.  
11 7 doi:10.4236/health.2014.65043  
12  
13 8 49 Litman JA. The COPE inventory: Dimensionality and relationships with approach- and  
14 9 avoidance-motives and positive and negative traits. *Pers Individ Dif* 2006;**41**:273–84.  
15 10 doi:10.1016/j.paid.2005.11.032  
16  
17 11 50 Mark G, Smith AP. Occupational stress, job characteristics, coping, and the mental  
18 12 health of nurses. *Br J Health Psychol* 2012;**17**:505–21. doi:10.1111/j.2044-  
19 13 8287.2011.02051.x  
20  
21 14 51 Khan A, Teoh KR, Islam S, *et al.* Psychosocial work characteristics, burnout,  
22 15 psychological morbidity symptoms and early retirement intentions: a cross-sectional  
23 16 study of NHS consultants in the UK. *BMJ Open* 2018;**8**:e018720.  
24 17 doi:10.1136/bmjopen-2017-018720  
25  
26 18 52 Lee RT, Seo B, Hladkyj S, *et al.* Correlates of physician burnout across regions and  
27 19 specialties: a meta-analysis. *Hum Resour Health* 2013;**11**:48. doi:10.1186/1478-4491-  
28 20 11-48  
29  
30 21 53 Umene-nakano W, Kato TA, Kikuchi S, *et al.* Nationwide Survey of Work  
31 22 Environment, Work-Life Balance and Burnout among Psychiatrists in Japan. *PLoS*  
32 23 *One* 2013;**8**:1–8. doi:10.1371/journal.pone.0055189  
33  
34 24 54 Keller M, Bamberg E, Kersten M, *et al.* Instrument for stress-related job analysis for  
35 25 hospital physicians: validation of a short version. *J Occup Med Toxicol* 2013;**8**:10–20.  
36 26 doi:10.1186/1745-6673-8-10  
37  
38 27 55 Shirom A, Nirel N, Vinokur AD. Work hours and caseload as predictors of physician  
39 28 burnout: The Mediating Effects by Perceived Workload and by Autonomy. *Appl*  
40 29 *Psychol* 2010;**59**:539–65. doi:10.1111/j.1464-0597.2009.00411.x  
41  
42 30 56 Wen J, Cheng Y, Hu X, *et al.* Workload, burnout, and medical mistakes among  
43 31 physicians in China: A cross-sectional study. *Biosci Trends* 2016;**10**:27–33.  
44 32 doi:10.5582/bst.2015.01175  
45  
46 33 57 Taylor C, Graham J, Potts H, *et al.* Impact of hospital consultant's poor mental health  
47 34 on patient care. *Br J Psychiatry* 2007;**190**:268–9.  
48  
49 35 58 Vela-Bueno A, Moreno-Jiménez B, Rodríguez-Muñoz A, *et al.* Insomnia and sleep  
50 36 quality among primary care physicians with low and high burnout levels. *J Psychosom*  
51 37 *Res* 2008;**64**:435–42. doi:10.1016/j.jpsychores.2007.10.014  
52  
53 38 59 Glovannucci E, Colditz G, Stampfer MJ, *et al.* The Assessment of Alcohol  
54 39 Consumption by a Simple Self-administered Questionnaire. *Am J Epidemiol*  
55 40 1991;**133**:810–7. doi:10.1093/oxfordjournals.aje.a115960  
56  
57  
58  
59  
60



Table

Table 1. Description of measures

| Item                                                | N   | No of Items | % of doctors with present symptom/<br>M(SD) | Recoding (if applicable)                                                                                                  | Measure             | Measure/Original Scoring                                               |
|-----------------------------------------------------|-----|-------------|---------------------------------------------|---------------------------------------------------------------------------------------------------------------------------|---------------------|------------------------------------------------------------------------|
| <b>Sleep disturbances</b>                           |     |             |                                             |                                                                                                                           |                     |                                                                        |
| Difficulty falling asleep                           | 390 | 1           | 22%                                         |                                                                                                                           |                     |                                                                        |
| Difficulty staying asleep                           | 390 | 1           | 35%                                         |                                                                                                                           |                     |                                                                        |
| Sleep problems interfere with daily functioning     | 389 | 1           | 35%                                         | 0,1 – Symptom absent; 2,3,4 - Symptom present                                                                             | ISI                 | 0 (scores showing no insomnia) to 4 (showing severe insomnia)          |
| Worried or distressed about a current sleep problem | 390 | 1           | 20%                                         |                                                                                                                           |                     |                                                                        |
| Dissatisfied with sleep pattern                     | 390 | 1           | 44%                                         | 0,1,2 – Symptom absent ( <i>2 is included as it means “unsure”</i> ); 3,4 - Symptom present                               |                     |                                                                        |
| Think about work when they go to bed                | 417 | 1           | 61%                                         |                                                                                                                           | Effort-Reward scale | 1 (strongly disagree) to 4 (strongly agree)                            |
| Trouble sleeping if they postpone tasks             | 416 | 1           | 49%                                         | 0,1 – Symptom absent; 2,3 - Symptom present                                                                               |                     |                                                                        |
| Insomnia                                            | 390 | 7           | 11%                                         | ≤14 – Symptom absent ( <i>no, subthreshold insomnia</i> ); ≥15 – Symptom present ( <i>moderate, severe insomnia</i> )[32] | ISI                 | 7 items; 0 (scores showing no insomnia) to 4 (showing severe insomnia) |

1  
2  
3  
4  
5  
6  
7  
8  
9  
10  
11  
12  
13  
14  
15  
16  
17  
18  
19  
20  
21  
22  
23  
24  
25  
26  
27  
28  
29  
30  
31  
32  
33  
34  
35  
36  
37  
38  
39  
40  
41  
42  
43  
44  
45  
46

---

**Substance use**

|                                                 |     |    |     |                                                                                                            |                                  |                                                            |
|-------------------------------------------------|-----|----|-----|------------------------------------------------------------------------------------------------------------|----------------------------------|------------------------------------------------------------|
| Substance use in order to feel better           | 392 | 1  | 34% | 1 – Symptom absent; 2, 3, 4 - Symptom present                                                              | The Brief COPE                   | 1 (I usually don't do this) to 4 (I usually do this a lot) |
| Substance use in order to get through something | 393 | 1  | 22% |                                                                                                            |                                  |                                                            |
| Frequency of drinking alcohol                   | 386 | 1  | 53% | 1,2,3 – not drinking or drinking less than 2-3 times a week; 4,5 - drinking 2-3 times a week or more often |                                  |                                                            |
| Quantity of drinks on typical day of drinking   | 362 | 1  | 27% | 1 – drinking 1,2 drinks; 2, 3, 4, 5 – drinking 3 or more drinks                                            | AUDIT                            | 1 (never/1-2) to 5 (daily/more than 10)                    |
| Drink 6 or more drinks on one occasion          | 373 | 1  | 44% | 1 – never; 2, 3, 4, 5 – binge-drinking                                                                     |                                  |                                                            |
| Alcohol dependence                              | 377 | 5  | 5%  | Substance abuse was identified if any of the items were answered “yes” [26]                                | The Patient Health Questionnaire | 0 (no) and 1 (yes)                                         |
| Drug use                                        | 380 | 22 | 44% | Drug use was identified if any of the items were answered “yes”                                            | Commonly Abused Drugs            | 22 items; 0 (no) and 1 (yes)                               |

---

**Physical symptoms**

|                         |     |   |     |                                               |                                |                                 |
|-------------------------|-----|---|-----|-----------------------------------------------|--------------------------------|---------------------------------|
| Fatigue                 | 390 | 1 | 69% |                                               |                                |                                 |
| Upset stomach or nausea | 390 | 1 | 19% | 1,2 – Symptom absent; 3,4,5 - Symptom present | The Physical Symptom Inventory | 1 (not at all) to 5 (every day) |
| Backache                | 390 | 1 | 33% |                                               |                                |                                 |

---

|    |                                                                           |     |   |     |                                    |                                                                                  |
|----|---------------------------------------------------------------------------|-----|---|-----|------------------------------------|----------------------------------------------------------------------------------|
| 1  |                                                                           |     |   |     |                                    |                                                                                  |
| 2  |                                                                           |     |   |     |                                    |                                                                                  |
| 3  | Headaches                                                                 | 390 | 1 | 27% |                                    |                                                                                  |
| 4  | Acid indigestion or heartburn                                             | 390 | 1 | 23% |                                    |                                                                                  |
| 5  | Eye strain                                                                | 390 | 1 | 29% |                                    |                                                                                  |
| 6  | Diarrhoea                                                                 | 390 | 1 | 12% |                                    |                                                                                  |
| 7  | Ringling in the ears                                                      | 390 | 1 | 13% |                                    |                                                                                  |
| 8  | Stomach cramps                                                            | 389 | 1 | 8%  |                                    |                                                                                  |
| 9  | Constipation                                                              | 390 | 1 | 4%  |                                    |                                                                                  |
| 10 | Loss of appetite                                                          | 390 | 1 | 7%  |                                    |                                                                                  |
| 11 | Dizziness                                                                 | 390 | 1 | 8%  |                                    |                                                                                  |
| 12 |                                                                           |     |   |     |                                    |                                                                                  |
| 13 | <b>Eating problems</b>                                                    |     |   |     |                                    |                                                                                  |
| 14 |                                                                           |     |   |     |                                    |                                                                                  |
| 15 | Eating large amounts of food when not physically hungry                   | 316 | 1 | 35% |                                    |                                                                                  |
| 16 | Eat until feeling uncomfortably full                                      | 316 | 1 | 31% |                                    |                                                                                  |
| 17 | Eat alone because they feel embarrassed                                   | 315 | 1 | 24% |                                    |                                                                                  |
| 18 | Feel disgusted with themselves, depressed or very guilty after overeating | 316 | 1 | 28% | n/a                                | 0 (no) and 1 (yes)                                                               |
| 19 | Feel upset about their uncontrollable eating or weight gain               | 316 | 1 | 29% |                                    |                                                                                  |
| 20 |                                                                           |     |   |     |                                    |                                                                                  |
| 21 | Binge eating                                                              | 316 | 9 | 8%  | Please see [31] details for coding | The Binge Eating Scale<br>8 items - 0 (no) and 1 (yes); 1 question – 0 to 7 days |
| 22 |                                                                           |     |   |     |                                    |                                                                                  |
| 23 |                                                                           |     |   |     |                                    |                                                                                  |
| 24 |                                                                           |     |   |     |                                    |                                                                                  |
| 25 |                                                                           |     |   |     |                                    |                                                                                  |
| 26 |                                                                           |     |   |     |                                    |                                                                                  |
| 27 |                                                                           |     |   |     |                                    |                                                                                  |
| 28 |                                                                           |     |   |     |                                    |                                                                                  |
| 29 |                                                                           |     |   |     |                                    |                                                                                  |
| 30 |                                                                           |     |   |     |                                    |                                                                                  |
| 31 |                                                                           |     |   |     |                                    |                                                                                  |
| 32 |                                                                           |     |   |     |                                    |                                                                                  |
| 33 |                                                                           |     |   |     |                                    |                                                                                  |
| 34 |                                                                           |     |   |     |                                    |                                                                                  |
| 35 |                                                                           |     |   |     |                                    |                                                                                  |
| 36 |                                                                           |     |   |     |                                    |                                                                                  |
| 37 |                                                                           |     |   |     |                                    |                                                                                  |
| 38 |                                                                           |     |   |     |                                    |                                                                                  |
| 39 |                                                                           |     |   |     |                                    |                                                                                  |
| 40 |                                                                           |     |   |     |                                    |                                                                                  |
| 41 |                                                                           |     |   |     |                                    |                                                                                  |
| 42 |                                                                           |     |   |     |                                    |                                                                                  |
| 43 |                                                                           |     |   |     |                                    |                                                                                  |
| 44 |                                                                           |     |   |     |                                    |                                                                                  |
| 45 |                                                                           |     |   |     |                                    |                                                                                  |
| 46 |                                                                           |     |   |     |                                    |                                                                                  |

1  
2  
3  
4  
5  
6  
7  
8  
9  
10  
11  
12  
13  
14  
15  
16  
17  
18  
19  
20  
21  
22  
23  
24  
25  
26  
27  
28  
29  
30  
31  
32  
33  
34  
35  
36  
37  
38  
39  
40  
41  
42  
43  
44  
45  
46

**Predictor variables**

|                               |     |    |                           |                                                                                                      |                            |                                                                                          |
|-------------------------------|-----|----|---------------------------|------------------------------------------------------------------------------------------------------|----------------------------|------------------------------------------------------------------------------------------|
| Burnout: Emotional exhaustion | 406 | 8  | 55% (M = 3.16; SD = 1.34) | Recoded for prevalence: <27 – Symptom absent; ≥27 – Symptom present [36]                             | MBI                        | 9 items; 0 (never) to 6 (every day)                                                      |
| Psychiatric morbidity         | 393 | 12 | 33% (M = 2.19; SD = 0.55) | Recoded for prevalence: 0,1 into 0 and 2,3 into 2; & < 4 – Symptom absent; ≥4 – Symptom present [35] | GHQ-12                     | 12 items; 0 (better than usual/not at all) to 3 (much less than usual/much less capable) |
| Effort scale                  | 415 | 3  | M = 3.3 (SD = 0.6)        | n/a                                                                                                  | Effort-Reward scale        | 3 items; 1 (strongly disagree) to 4 (strongly agree)                                     |
| Work-family Imbalance         | 416 | 5  | M = 5.26 (SD = 1.38)      | n/a                                                                                                  | Work-Family Conflict scale | 5 items; 0 (strongly disagree) to 6 (strongly agree)                                     |
| Coping: Substance use         | 392 | 2  | M = 2.33 (SD = 0.88)      | n/a                                                                                                  | The Brief COPE             | 2 items; 1 (I usually don't do this) to 4 (I usually do this a lot)                      |
| Coping: Self-blame            | 393 | 2  | M = 1.37 (SD = 0.61)      | n/a                                                                                                  |                            |                                                                                          |

**Table 2.** Participants' sociodemographic characteristics

| Sociodemographic characteristics  |                                    | %(n) or<br>M(SD) | LRMP  |
|-----------------------------------|------------------------------------|------------------|-------|
| Gender (Male)                     |                                    | 48% (199)        | 54.5% |
| Age                               |                                    | 47.23 (10.97)    |       |
|                                   | Under 30                           | 7% (28)          | 13%   |
|                                   | 30-49                              | 46% (190)        | 59%   |
|                                   | Over 50                            | 48% (197)        | 28%   |
| Year of experience<br>in medicine |                                    | 22.94 (11.35)    | N/A   |
| Grade                             | Junior doctor                      | 20% (82)         | 21%   |
|                                   | General<br>practitioner            | 18% (75)         | 23%   |
|                                   | Consultant                         | 49% (203)        | 32%   |
|                                   | Other                              | 14% (57)         | 23%   |
| Workplace                         | Community                          | 5% (21)          |       |
|                                   | General practice                   | 15% (61)         |       |
|                                   | Hospital                           | 58% (239)        | N/A   |
|                                   | Multiple-places                    | 15% (61)         |       |
|                                   | Other                              | 8% (32)          |       |
| Specialty                         | General practice                   | 17% (71)         | 23%   |
|                                   | Public health                      | 12% (49)         | 0.4%  |
|                                   | Anaesthetics and<br>intensive care | 9% (39)          | 8%    |
|                                   | Paediatrics                        | 7% (27)          | 2%    |
|                                   | Emergency<br>medicine              | 6% (24)          | 1%    |
|                                   | Psychiatry                         | 6% (25)          | 3%    |
|                                   | Other                              | 44% (184)        |       |
| Working hours                     | ≤40                                | 34% (141)        | N/A   |
|                                   | 41-50                              | 41% (170)        |       |
|                                   | >50                                | 15% (104)        |       |

*Note.* LRMP – List of registered medical practitioners

Table 3. Logistic regression predicting substance use problems

|                                                 |       | Constant                                                  | Psychiatric morbidity | Burnout (emotional exhaustion) | Job effort | Work-life balance | Coping: Self-blame | Coping: Substance use | Work experience (years) | Work place (hospital) <sup>a</sup> |
|-------------------------------------------------|-------|-----------------------------------------------------------|-----------------------|--------------------------------|------------|-------------------|--------------------|-----------------------|-------------------------|------------------------------------|
| Substance use in order to feel better           | B     | -2.239                                                    | 0.304                 | 0.162                          | 0.096      | -0.083            | 0.092              | n/a                   | 0.011                   | 0.053                              |
|                                                 | SE    | 0.844                                                     | 0.258                 | 0.123                          | 0.237      | 0.100             | 0.135              | n/a                   | 0.010                   | 0.231                              |
|                                                 | OR    | 0.107                                                     | 1.355                 | 1.175                          | 1.101      | 0.921             | 1.097              | n/a                   | 1.011                   | 1.054                              |
|                                                 | p     | 0.008                                                     | 0.239                 | 0.190                          | 0.685      | 0.411             | 0.493              | n/a                   | 0.278                   | 0.819                              |
|                                                 | Model | X <sup>2</sup> (7)=10.96; p=0.140; R <sup>2</sup> =0.04   |                       |                                |            |                   |                    |                       |                         |                                    |
| Substance use in order to get through something | B     | -3.034                                                    | 0.423                 | 0.085                          | 0.202      | -0.179            | <b>0.318</b>       | n/a                   | 0.002                   | 0.005                              |
|                                                 | SE    | 0.963                                                     | 0.289                 | 0.142                          | 0.274      | 0.113             | <b>0.154</b>       | n/a                   | 0.012                   | 0.266                              |
|                                                 | OR    | 0.048                                                     | 1.527                 | 1.089                          | 1.224      | 0.836             | <b>1.374</b>       | n/a                   | 1.002                   | 1.005                              |
|                                                 | p     | 0.002                                                     | 0.143                 | 0.551                          | 0.461      | 0.113             | <b>0.039</b>       | n/a                   | 0.859                   | 0.986                              |
|                                                 | Model | X <sup>2</sup> (7)=14.76; p=0.039; R <sup>2</sup> =0.059  |                       |                                |            |                   |                    |                       |                         |                                    |
| Drinking alcohol 2-3 times a week or more often | B     | -2.297                                                    | <b>-0.739</b>         | 0.203                          | -0.360     | 0.086             | -0.183             | <b>2.936</b>          | <b>0.035</b>            | 0.013                              |
|                                                 | SE    | 1.001                                                     | <b>0.316</b>          | 0.141                          | 0.256      | 0.114             | <b>0.155</b>       | <b>0.393</b>          | <b>0.011</b>            | 0.257                              |
|                                                 | OR    | 0.101                                                     | <b>0.478</b>          | 1.226                          | 0.698      | 1.090             | 0.833              | <b>18.836</b>         | <b>1.036</b>            | 1.013                              |
|                                                 | p     | 0.022                                                     | <b>0.019</b>          | 0.148                          | 0.160      | 0.449             | 0.237              | <b>&lt;0.001</b>      | <b>0.002</b>            | 0.960                              |
|                                                 | Model | X <sup>2</sup> (8)=123.03; p<0.001; R <sup>2</sup> =0.379 |                       |                                |            |                   |                    |                       |                         |                                    |
| Drink more                                      | B     | -2.593                                                    | -0.222                | -0.041                         | 0.185      | -0.004            | -0.083             | <b>0.955</b>          | 0.002                   | <b>0.594</b>                       |

|                                        |       | Constant                                                  | Psychiatric morbidity | Burnout (emotional exhaustion) | Job effort | Work-life balance | Coping: Self-blame | Coping: Substance use | Work experience (years) | Work place (hospital) <sup>a</sup> |
|----------------------------------------|-------|-----------------------------------------------------------|-----------------------|--------------------------------|------------|-------------------|--------------------|-----------------------|-------------------------|------------------------------------|
| than 3 drinks typically                | SE    | 0.975                                                     | 0.314                 | 0.141                          | 0.281      | 0.119             | 0.161              | <b>0.206</b>          | 0.012                   | <b>0.276</b>                       |
|                                        | OR    | 0.075                                                     | 0.801                 | 0.772                          | 1.203      | 0.996             | 0.920              | <b>2.599</b>          | 1.002                   | <b>1.812</b>                       |
|                                        | p     | 0.008                                                     | 0.480                 | 0.960                          | 0.511      | 0.971             | 0.604              | <b>&lt;0.001</b>      | 0.885                   | <b>0.031</b>                       |
|                                        | Model | X <sup>2</sup> (8)=29.10; p<0.001; R <sup>2</sup> =0.118  |                       |                                |            |                   |                    |                       |                         |                                    |
| Drink 6 or more drinks on one occasion | B     | -0.341                                                    | -0.481                | 0.038                          | -0.440     | 0.148             | -0.190             | <b>1.849</b>          | <b>-0.030</b>           | <b>0.514</b>                       |
|                                        | SE    | 0.942                                                     | 0.308                 | 0.135                          | 0.260      | 0.113             | 0.151              | <b>0.267</b>          | <b>0.011</b>            | <b>0.255</b>                       |
|                                        | OR    | 0.711                                                     | 0.618                 | 1.039                          | 0.644      | 1.159             | 0.827              | <b>6.355</b>          | <b>0.970</b>            | <b>1.672</b>                       |
|                                        | p     | 0.717                                                     | 0.118                 | 0.777                          | 0.090      | 0.191             | 0.209              | <b>&lt;0.001</b>      | <b>0.007</b>            | <b>0.044</b>                       |
|                                        | Model | X <sup>2</sup> (8)=83.18; p<0.001; R <sup>2</sup> =0.279  |                       |                                |            |                   |                    |                       |                         |                                    |
| Alcohol dependence                     | B     | -3.171                                                    | -0.047                | 0.037                          | -0.855     | 0.162             | -0.091             | <b>1.819</b>          | -0.041                  | 0.095                              |
|                                        | SE    | 1.781                                                     | 0.581                 | 0.286                          | 0.623      | 0.269             | 0.350              | <b>0.359</b>          | 0.028                   | 0.616                              |
|                                        | OR    | 0.042                                                     | 0.955                 | 1.037                          | 0.425      | 1.176             | 0.913              | <b>6.165</b>          | 0.960                   | 1.100                              |
|                                        | p     | 0.075                                                     | 0.936                 | 0.898                          | 0.170      | 0.548             | 0.795              | <b>&lt;0.001</b>      | 0.153                   | 0.877                              |
|                                        | Model | X <sup>2</sup> (8)=34.648; p<0.001; R <sup>2</sup> =0.280 |                       |                                |            |                   |                    |                       |                         |                                    |
| Drug use                               | B     | -1.732                                                    | -0.084                | 0.073                          | 0.192      | 0.067             | 0.068              | <b>0.425</b>          | -0.011                  | -0.047                             |
|                                        | SE    | 0.830                                                     | 0.256                 | 0.120                          | 0.228      | 0.099             | 0.133              | <b>0.186</b>          | 0.010                   | 0.226                              |
|                                        | OR    | 0.177                                                     | 0.92                  | 1.076                          | 1.211      | 1.069             | 1.070              | <b>1.530</b>          | 0.989                   | 0.954                              |
|                                        | p     | 0.037                                                     | 0.744                 | 0.541                          | 0.400      | 0.501             | 0.608              | <b>0.022</b>          | 0.287                   | 0.835                              |

|       | <b>Constant</b>                     | <b>Psychiatric morbidity</b> | <b>Burnout (emotional exhaustion)</b> | <b>Job effort</b> | <b>Work-life balance</b> | <b>Coping: Self-blame</b> | <b>Coping: Substance use</b> | <b>Work experience (years)</b> | <b>Work place (hospital)<sup>a</sup></b> |
|-------|-------------------------------------|------------------------------|---------------------------------------|-------------------|--------------------------|---------------------------|------------------------------|--------------------------------|------------------------------------------|
| Model | $X^2(8)=13.935; p=0.083; R^2=0.051$ |                              |                                       |                   |                          |                           |                              |                                |                                          |

*Note.* n/a – scale is not included in the analysis because predictor is a part of it. <sup>a</sup> 1= Hospital (n=239); 0 = Other (n=175)

For peer review only

1  
2  
3  
4  
5  
6  
7  
8  
9  
10  
11  
12  
13  
14  
15  
16  
17  
18  
19  
20  
21  
22  
23  
24  
25  
26  
27  
28  
29  
30  
31  
32  
33  
34  
35  
36  
37  
38  
39  
40  
41  
42  
43  
44  
45  
46



**Table 4.** Logistic regression predicting substance binge-eating problems

|                                                         |       | Constant                                                  | Psychiatric morbidity | Burnout (emotional exhaustion) | Job effort | Work-life balance | Coping: Self-blame | Coping: Substance use | Work experience (years) | Work place (hospital) <sup>a</sup> |
|---------------------------------------------------------|-------|-----------------------------------------------------------|-----------------------|--------------------------------|------------|-------------------|--------------------|-----------------------|-------------------------|------------------------------------|
| Eating large amounts of food when not physically hungry | B     | -1.831                                                    | 0.344                 | 0.127                          | -0.403     | 0.176             | <b>0.410</b>       | -0.094                | -0.022                  | -0.040                             |
|                                                         | SE    | 0.935                                                     | 0.290                 | 0.142                          | 0.275      | 0.124             | <b>0.156</b>       | 0.208                 | 0.011                   | 0.271                              |
|                                                         | OR    | 0.160                                                     | 1.410                 | 1.136                          | 0.669      | 1.193             | <b>1.507</b>       | 0.910                 | 0.978                   | 0.961                              |
|                                                         | p     | 0.050                                                     | 0.236                 | 0.370                          | 0.143      | 0.156             | <b>0.009</b>       | 0.652                 | 0.052                   | 0.883                              |
|                                                         | Model | X <sup>2</sup> (8)=29.537; p<0.001; R <sup>2</sup> =0.127 |                       |                                |            |                   |                    |                       |                         |                                    |
| Eat until feeling uncomfortably full                    | B     | -2.229                                                    | 0.064                 | 0.132                          | -0.186     | <b>0.271</b>      | 0.297              | -0.117                | -0.018                  | -0.342                             |
|                                                         | SE    | 0.972                                                     | 0.294                 | 0.144                          | 0.278      | <b>0.131</b>      | 0.159              | 0.214                 | 0.012                   | 0.275                              |
|                                                         | OR    | 0.108                                                     | 1.066                 | 1.141                          | 0.831      | <b>1.311</b>      | 1.346              | 0.890                 | 0.982                   | 0.710                              |
|                                                         | p     | 0.022                                                     | 0.828                 | 0.359                          | 0.504      | <b>0.038</b>      | 0.062              | 0.585                 | 0.121                   | 0.212                              |
|                                                         | Model | X <sup>2</sup> (8)=22.420; p=0.004; R <sup>2</sup> =0.100 |                       |                                |            |                   |                    |                       |                         |                                    |
| Eat alone because they feel embarrassed                 | B     | -3.111                                                    | 0.233                 | 0.213                          | -0.139     | 0.112             | <b>0.378</b>       | 0.089                 | -0.015                  | -0.386                             |
|                                                         | SE    | 1.068                                                     | 0.314                 | 0.158                          | 0.307      | 0.139             | <b>0.175</b>       | 0.220                 | 0.013                   | 0.300                              |
|                                                         | OR    | 0.045                                                     | 1.262                 | 1.237                          | 0.870      | 1.119             | 1.460              | 1.093                 | 0.985                   | 0.680                              |
|                                                         | p     | 0.004                                                     | 0.458                 | 0.178                          | 0.650      | 0.418             | 0.031              | 0.686                 | 0.255                   | 0.199                              |
|                                                         | Model | X <sup>2</sup> (8)=21.890; p=0.005; R <sup>2</sup> =0.105 |                       |                                |            |                   |                    |                       |                         |                                    |
| Feel disgusted                                          | B     | -2.237                                                    | 0.079                 | <b>0.321</b>                   | -0.313     | 0.208             | 0.335              | 0.154                 | <b>-0.034</b>           | <b>-0.791</b>                      |

|                |       | Constan<br>t                                              | Psychiatric<br>morbidity | Burnout<br>(emotional<br>exhaustion) | Job<br>effort    | Work-life<br>balance | Coping:<br>Self-<br>blame | Coping:<br>Substance<br>use | Work<br>experienc<br>e (years) | Work place<br>(hospital) <sup>a</sup> |
|----------------|-------|-----------------------------------------------------------|--------------------------|--------------------------------------|------------------|----------------------|---------------------------|-----------------------------|--------------------------------|---------------------------------------|
| with           | SE    | 1.036                                                     | 0.310                    | <b>0.155</b>                         | 0.299            | 0.138                | 0.172                     | 0.218                       | <b>0.013</b>                   | <b>0.298</b>                          |
| themselves,    | OR    | 0.107                                                     | 1.082                    | <b>1.378</b>                         | 0.731            | 1.231                | 1.398                     | 1.166                       | <b>0.966</b>                   | <b>0.453</b>                          |
| depressed or   | p     | 0.031                                                     | 0.799                    | <b>0.038</b>                         | 0.295            | 0.132                | 0.052                     | 0.481                       | <b>0.009</b>                   | <b>0.008</b>                          |
| very guilty    | Model | X <sup>2</sup> (8)=38.029; p<0.001; R <sup>2</sup> =0.171 |                          |                                      |                  |                      |                           |                             |                                |                                       |
| after          |       |                                                           |                          |                                      |                  |                      |                           |                             |                                |                                       |
| overeating     |       |                                                           |                          |                                      |                  |                      |                           |                             |                                |                                       |
| Feel upset     | B     | -2.367                                                    | -0.187                   | <b>0.324</b>                         | -0.234           | 0.206                | <b>0.337</b>              | 0.021                       | -0.015                         | -0.200                                |
| about their    | SE    | 0.998                                                     | 0.302                    | <b>0.150</b>                         | 0.287            | 0.133                | <b>0.164</b>              | 0.212                       | 0.012                          | 0.282                                 |
| uncontrollable | OR    | 0.094                                                     | 0.830                    | <b>1.383</b>                         | 0.792            | 1.228                | <b>1.400</b>              | 1.021                       | 0.986                          | 0.819                                 |
| eating or      | p     | 0.018                                                     | 0.537                    | <b>0.030</b>                         | 0.416            | 0.121                | <b>0.040</b>              | 0.922                       | 0.231                          | 0.478                                 |
| weight gain    | Model | X <sup>2</sup> (8)=23.374; p=0.003; R <sup>2</sup> =0.106 |                          |                                      |                  |                      |                           |                             |                                |                                       |
| Binge eating   | B     | -1.064                                                    | -0.343                   | <b>0.610</b>                         | <b>-1.678</b>    | 0.250                | 0.473                     | 0.220                       | -0.014                         | 0.224                                 |
|                | SE    | 1.395                                                     | 0.445                    | <b>0.237</b>                         | <b>0.443</b>     | 0.219                | 0.253                     | 0.309                       | 0.019                          | 0.444                                 |
|                | OR    | 0.345                                                     | 0.710                    | <b>1.841</b>                         | <b>0.187</b>     | 1.284                | 1.606                     | 1.246                       | 0.986                          | 1.251                                 |
|                | p     | 0.446                                                     | 0.440                    | <b>0.010</b>                         | <b>&lt;0.001</b> | 0.253                | 0.062                     | 0.477                       | 0.458                          | 0.614                                 |
|                | Model | X <sup>2</sup> (8)=27.089; p=0.001; R <sup>2</sup> =0.163 |                          |                                      |                  |                      |                           |                             |                                |                                       |

Note. <sup>a</sup> 1= Hospital (n=239); 0 = Other (n=175)

**Table 5.** Logistic regression predicting sleep disturbances

|                                 |       | Constant                                                 | Psychiatric morbidity | Burnout (emotional exhaustion) | Job effort | Work-life balance | Coping: Self-blame | Coping: Substance use | Work experience (years) | Work place (hospital) <sup>a</sup> |
|---------------------------------|-------|----------------------------------------------------------|-----------------------|--------------------------------|------------|-------------------|--------------------|-----------------------|-------------------------|------------------------------------|
| Difficulty falling asleep       | B     | -5.019                                                   | <b>0.906</b>          | <b>0.393</b>                   | -0.303     | 0.107             | -0.039             | <b>0.617</b>          | -0.022                  | <b>0.669</b>                       |
|                                 | SE    | 1.098                                                    | <b>0.304</b>          | <b>0.158</b>                   | 0.313      | 0.139             | 0.171              | <b>0.210</b>          | 0.013                   | <b>0.308</b>                       |
|                                 | OR    | 0.007                                                    | <b>2.474</b>          | <b>1.482</b>                   | 0.738      | 1.113             | 0.962              | <b>1.854</b>          | 0.979                   | <b>1.953</b>                       |
|                                 | p     | <0.001                                                   | <b>0.003</b>          | <b>0.013</b>                   | 0.333      | 0.443             | 0.822              | <b>0.003</b>          | 0.103                   | <b>0.030</b>                       |
|                                 | Model | X <sup>2</sup> (8)=65.69; p<0.001; R <sup>2</sup> =0.249 |                       |                                |            |                   |                    |                       |                         |                                    |
| Difficulty staying asleep       | B     | -5.593                                                   | <b>0.829</b>          | <b>0.468</b>                   | -0.022     | 0.038             | 0.155              | <b>0.443</b>          | 0.014                   | 0.275                              |
|                                 | SE    | 1.014                                                    | <b>0.286</b>          | <b>0.137</b>                   | 0.267      | 0.114             | 0.148              | <b>0.202</b>          | 0.012                   | 0.257                              |
|                                 | OR    | 0.004                                                    | <b>2.291</b>          | <b>1.596</b>                   | 0.978      | 1.039             | 1.168              | <b>1.557</b>          | 1.014                   | 1.317                              |
|                                 | p     | <0.001                                                   | <b>0.004</b>          | <b>0.001</b>                   | 0.933      | 0.741             | 0.296              | <b>0.028</b>          | 0.233                   | 0.285                              |
|                                 | Model | X <sup>2</sup> (8)=79.09; p<0.001; R <sup>2</sup> =0.264 |                       |                                |            |                   |                    |                       |                         |                                    |
| Dissatisfied with sleep pattern | B     | -3.678                                                   | <b>0.962</b>          | <b>0.536</b>                   | -0.142     | -0.050            | -0.006             | 0.280                 | -0.014                  | 0.438                              |
|                                 | SE    | 0.937                                                    | <b>0.292</b>          | <b>0.134</b>                   | 0.256      | 0.108             | 0.143              | 0.200                 | 0.011                   | 0.250                              |
|                                 | OR    | 0.025                                                    | <b>2.617</b>          | <b>1.710</b>                   | 0.868      | 0.642             | 0.994              | 1.324                 | 0.986                   | 1.549                              |
|                                 | p     | <0.001                                                   | <b>0.001</b>          | <b>&lt;0.001</b>               | 0.579      | 0.951             | 0.966              | 0.160                 | 0.200                   | 0.080                              |
|                                 | Model | X <sup>2</sup> (8)=85.18; p<0.001; R <sup>2</sup> =0.274 |                       |                                |            |                   |                    |                       |                         |                                    |
| Sleep problems interfere with   | B     | -5.352                                                   | <b>1.047</b>          | <b>0.492</b>                   | -0.303     | 0.058             | <b>0.347</b>       | <b>0.485</b>          | -0.016                  | 0.483                              |
|                                 | SE    | 1.040                                                    | <b>0.299</b>          | <b>0.144</b>                   | 0.283      | 0.120             | <b>0.153</b>       | <b>0.208</b>          | 0.012                   | 0.272                              |

|                                                     |       | Constant                                                  | Psychiatric morbidity | Burnout (emotional exhaustion) | Job effort | Work-life balance | Coping: Self-blame | Coping: Substance use | Work experience (years) | Work place (hospital) <sup>a</sup> |
|-----------------------------------------------------|-------|-----------------------------------------------------------|-----------------------|--------------------------------|------------|-------------------|--------------------|-----------------------|-------------------------|------------------------------------|
| daily functioning                                   | OR    | 0.005                                                     | <b>2.848</b>          | <b>1.636</b>                   | 0.739      | 1.059             | <b>1.414</b>       | <b>1.625</b>          | 0.984                   | 1.621                              |
|                                                     | p     | <0.001                                                    | <b>&lt;0.001</b>      | <b>0.001</b>                   | 0.284      | 0.631             | <b>0.023</b>       | <b>0.019</b>          | 0.187                   | 0.075                              |
|                                                     | Model | X <sup>2</sup> (8)=102.74; p<0.001; R <sup>2</sup> =0.333 |                       |                                |            |                   |                    |                       |                         |                                    |
| Worried or distressed about a current sleep problem | B     | -6.003                                                    | <b>1.342</b>          | <b>0.570</b>                   | -0.414     | 0.014             | 0.267              | -0.033                | 0-.013                  | <b>0.776</b>                       |
|                                                     | SE    | 1.202                                                     | <b>0.321</b>          | <b>0.171</b>                   | 0.340      | 0.146             | 0.179              | 0.232                 | 0.014                   | <b>0.331</b>                       |
|                                                     | OR    | 0.002                                                     | <b>3.826</b>          | <b>1.768</b>                   | 0.661      | 1.014             | 1.306              | 0.968                 | 0.987                   | <b>2.172</b>                       |
|                                                     | p     | <0.001                                                    | <b>&lt;0.001</b>      | <b>0.001</b>                   | 0.224      | 0.924             | 0.136              | 0.888                 | 0.362                   | <b>0.019</b>                       |
|                                                     | Model | X <sup>2</sup> (8)=86.58; p<0.001; R <sup>2</sup> =0.327  |                       |                                |            |                   |                    |                       |                         |                                    |
| Think about work when they go to bed                | B     | -6.476                                                    | <b>0.750</b>          | <b>0.295</b>                   | 0.214      | <b>0.456</b>      | <b>0.616</b>       | -0.053                | -0.010                  | 0.399                              |
|                                                     | SE    | 1.091                                                     | <b>0.337</b>          | <b>0.141</b>                   | 0.263      | <b>0.116</b>      | <b>0.160</b>       | 0.227                 | 0.012                   | 0.263                              |
|                                                     | OR    | 0.002                                                     | <b>2.117</b>          | <b>1.344</b>                   | 1.238      | <b>1.577</b>      | <b>1.851</b>       | 0.948                 | 0.990                   | 1.491                              |
|                                                     | p     | <0.001                                                    | <b>0.026</b>          | <b>0.036</b>                   | 0.416      | <b>&lt;0.001</b>  | <b>&lt;0.001</b>   | 0.814                 | 0.393                   | 0.128                              |
|                                                     | Model | X <sup>2</sup> (8)=128.23; p<0.001; R <sup>2</sup> =0.391 |                       |                                |            |                   |                    |                       |                         |                                    |
| Trouble sleeping if they postpone tasks             | B     | -3.377                                                    | 0.434                 | <b>0.337</b>                   | -0.273     | 0.243             | <b>0.460</b>       | 0.090                 | -0.013                  | 0.011                              |
|                                                     | SE    | 0.901                                                     | 0.277                 | <b>0.128</b>                   | 0.247      | 0.107             | <b>0.140</b>       | 0.196                 | 0.011                   | 0.239                              |
|                                                     | OR    | 0.034                                                     | 1.544                 | <b>1.401</b>                   | 0.761      | 1.275             | <b>1.584</b>       | 1.094                 | 0.988                   | 1.011                              |
|                                                     | p     | <0.001                                                    | 0.117                 | <b>0.008</b>                   | 0.270      | 0.023             | <b>0.001</b>       | 0.648                 | 0.237                   | 0.965                              |
|                                                     | Model | X <sup>2</sup> (8)=72.32; p<0.001; R <sup>2</sup> =0.234  |                       |                                |            |                   |                    |                       |                         |                                    |

|          |       | Constan<br>t                                             | Psychiatric<br>morbidity | Burnout<br>(emotional<br>exhaustion) | Job<br>effort | Work-life<br>balance | Coping:<br>Self-<br>blame | Coping:<br>Substance<br>use | Work<br>experienc<br>e (years) | Work place<br>(hospital) <sup>a</sup> |
|----------|-------|----------------------------------------------------------|--------------------------|--------------------------------------|---------------|----------------------|---------------------------|-----------------------------|--------------------------------|---------------------------------------|
| Insomnia | B     | -8.627                                                   | <b>1.458</b>             | <b>0.597</b>                         | -0.109        | 0.035                | 0.346                     | 0.148                       | -0.025                         | 0.802                                 |
|          | SE    | 1.600                                                    | <b>0.378</b>             | <b>0.216</b>                         | 0.433         | 0.191                | 0.226                     | 0.270                       | 0.018                          | 0.417                                 |
|          | OR    | <0.001                                                   | <b>4.299</b>             | <b>1.817</b>                         | 0.897         | 1.036                | 1.414                     | 1.160                       | 0.975                          | 2.231                                 |
|          | p     | <0.001                                                   | <b>&lt;0.001</b>         | <b>0.006</b>                         | 0.802         | 0.854                | 0.126                     | 0.582                       | 0.162                          | 0.054                                 |
|          | Model | X <sup>2</sup> (8)=78.24; p<0.001; R <sup>2</sup> =0.360 |                          |                                      |               |                      |                           |                             |                                |                                       |

*Note.* <sup>a</sup> 1= Hospital (n=239); 0 = Other (n=175)

**Table 6.** Logistic regression predicting ill health

|                         |       | Constant                                                   | Psychiatric morbidity | Burnout (emotional exhaustion) | Job effort   | Work-life balance | Coping: Self-blame | Coping: Substance use | Work experience (years) | Work place (hospital) <sup>a</sup> |
|-------------------------|-------|------------------------------------------------------------|-----------------------|--------------------------------|--------------|-------------------|--------------------|-----------------------|-------------------------|------------------------------------|
| Fatigue                 | B     | -3.632                                                     | <b>0.947</b>          | <b>0.590</b>                   | 0.127        | 0.056             | 0.308              | 0.083                 | <b>-0.029</b>           | -0.130                             |
|                         | SE    | 1.079                                                      | <b>0.386</b>          | <b>0.152</b>                   | 0.267        | 0.115             | 0.164              | 0.247                 | <b>0.012</b>            | 0.276                              |
|                         | OR    | 0.026                                                      | <b>2.577</b>          | <b>1.804</b>                   | 1.135        | 1.058             | 1.360              | 1.087                 | <b>0.972</b>            | 0.878                              |
|                         | p     | 0.001                                                      | <b>0.014</b>          | <b>&lt;0.001</b>               | 0.635        | 0.623             | 0.060              | 0.735                 | <b>0.019</b>            | 0.637                              |
|                         | Model | X <sup>2</sup> (8)=106.899; p<0.001; R <sup>2</sup> =0.352 |                       |                                |              |                   |                    |                       |                         |                                    |
| Upset stomach or nausea | B     | -3.970                                                     | <b>1.265</b>          | 0.094                          | 0.091        | -0.011            | 0.057              | -0.200                | <b>-0.038</b>           | -0.059                             |
|                         | SE    | 1.089                                                      | <b>0.312</b>          | 0.157                          | 0.313        | 0.136             | 0.173              | 0.237                 | <b>0.014</b>            | 0.303                              |
|                         | OR    | 0.019                                                      | <b>3.544</b>          | 1.098                          | 1.095        | 0.989             | 1.059              | 0.819                 | <b>0.963</b>            | 0.942                              |
|                         | p     | <0.001                                                     | <b>&lt;0.001</b>      | 0.550                          | 0.771        | 0.936             | 0.742              | 0.399                 | <b>0.006</b>            | 0.845                              |
|                         | Model | X <sup>2</sup> (8)=45.36; p<0.001; R <sup>2</sup> =0.185   |                       |                                |              |                   |                    |                       |                         |                                    |
| Backache                | B     | -2.011                                                     | 0.218                 | 0.176                          | -0.172       | 0.161             | 0.026              | -0.070                | -0.001                  | -0.025                             |
|                         | SE    | 0.863                                                      | 0.262                 | 0.126                          | 0.244        | 0.108             | 0.139              | 0.190                 | 0.010                   | 0.237                              |
|                         | OR    | 0.134                                                      | 1.243                 | 1.193                          | 0.842        | 1.175             | 1.026              | 0.932                 | 0.999                   | 0.975                              |
|                         | p     | 0.020                                                      | 0.407                 | 0.161                          | 0.481        | 0.138             | 0.854              | 0.712                 | 0.955                   | 0.917                              |
|                         | Model | X <sup>2</sup> (8)=13.96; p=0.083; R <sup>2</sup> =0.051   |                       |                                |              |                   |                    |                       |                         |                                    |
| Headaches               | B     | -6.523                                                     | <b>0.944</b>          | 0.272                          | <b>0.644</b> | 0.069             | 0.035              | 0.132                 | <b>-0.029</b>           | 0.394                              |
|                         | SE    | 1.114                                                      | <b>0.293</b>          | 0.143                          | <b>0.297</b> | 0.125             | 0.158              | 0.208                 | <b>0.013</b>            | 0.280                              |

|                               |       | Constant                                                  | Psychiatric morbidity | Burnout (emotional exhaustion) | Job effort   | Work-life balance | Coping: Self-blame | Coping: Substance use | Work experience (years) | Work place (hospital) <sup>a</sup> |
|-------------------------------|-------|-----------------------------------------------------------|-----------------------|--------------------------------|--------------|-------------------|--------------------|-----------------------|-------------------------|------------------------------------|
|                               | OR    | 0.001                                                     | <b>2.570</b>          | 1.313                          | <b>1.905</b> | 1.071             | 1.035              | 1.141                 | <b>0.972</b>            | 1.483                              |
|                               | p     | <0.001                                                    | <b>0.001</b>          | 0.057                          | <b>0.030</b> | 0.580             | 0.826              | 0.527                 | <b>0.024</b>            | 0.160                              |
|                               | Model | X <sup>2</sup> (8)=75.67; p<0.001; R <sup>2</sup> =0.267  |                       |                                |              |                   |                    |                       |                         |                                    |
| Acid indigestion or heartburn | B     | -4.707                                                    | <b>0.826</b>          | 0.120                          | 0.323        | -0.011            | 0.007              | -0.062                | 0.007                   | 0.185                              |
|                               | SE    | 1.030                                                     | <b>0.290</b>          | 0.142                          | 0.284        | 0.119             | 0.158              | 0.209                 | 0.012                   | 0.270                              |
|                               | OR    | 0.009                                                     | <b>2.284</b>          | 1.128                          | 1.382        | 0.989             | 1.007              | 0.940                 | 1.007                   | 1.203                              |
|                               | p     | <0.001                                                    | <b>0.004</b>          | 0.398                          | 0.255        | 0.928             | 0.965              | 0.768                 | 0.549                   | 0.493                              |
|                               | Model | X <sup>2</sup> (8)=27.78; p=0.001; R <sup>2</sup> =0.109  |                       |                                |              |                   |                    |                       |                         |                                    |
| Eye strain                    | B     | -3.929                                                    | <b>0.657</b>          | -0.06                          | 0.496        | 0.066             | -0.027             | 0.088                 | -0.012                  | -0.129                             |
|                               | SE    | 0.945                                                     | <b>0.275</b>          | 0.13                           | 0.259        | 0.110             | 0.146              | 0.194                 | 0.011                   | 0.249                              |
|                               | OR    | 0.020                                                     | <b>1.930</b>          | 0.942                          | 1.641        | 1.068             | 0.973              | 1.092                 | 0.988                   | 0.879                              |
|                               | p     | <0.001                                                    | <b>0.017</b>          | 0.647                          | 0.056        | 0.550             | 0.851              | 0.650                 | 0.299                   | 0.606                              |
|                               | Model | X <sup>2</sup> (8)= 22.45; p=0.004; R <sup>2</sup> =0.084 |                       |                                |              |                   |                    |                       |                         |                                    |
| Diarrhea                      | B     | -5.574                                                    | 0.576                 | -0.155                         | -0.245       | <b>0.541</b>      | 0.212              | -0.020                | 0.002                   | 0.148                              |
|                               | SE    | 1.317                                                     | 0.349                 | 0.179                          | 0.363        | <b>0.191</b>      | 0.198              | 0.259                 | 0.015                   | 0.350                              |
|                               | OR    | 0.004                                                     | 1.779                 | 0.857                          | 0.783        | <b>1.717</b>      | 1.237              | 0.981                 | 1.002                   | 1.159                              |
|                               | p     | <0.001                                                    | 0.098                 | 0.386                          | 0.501        | <b>0.005</b>      | 0.284              | 0.940                 | 0.877                   | 0.672                              |
|                               | Model | X <sup>2</sup> (8)=21.640; p=0.006; R <sup>2</sup> =0.106 |                       |                                |              |                   |                    |                       |                         |                                    |

|                      |       | <b>Constant</b>                                           | <b>Psychiatric morbidity</b> | <b>Burnout (emotional exhaustion)</b> | <b>Job effort</b> | <b>Work-life balance</b> | <b>Coping: Self-blame</b> | <b>Coping: Substance use</b> | <b>Work experience (years)</b> | <b>Work place (hospital)<sup>a</sup></b> |
|----------------------|-------|-----------------------------------------------------------|------------------------------|---------------------------------------|-------------------|--------------------------|---------------------------|------------------------------|--------------------------------|------------------------------------------|
| Ringings in the ears | B     | -3.318                                                    | 0.315                        | 0.292                                 | -0.372            | -0.018                   | 0.063                     | -0.155                       | <b>0.048</b>                   | <0.0001                                  |
|                      | SE    | 1.204                                                     | 0.358                        | 0.182                                 | 0.342             | 0.144                    | 0.192                     | 0.262                        | <b>0.015</b>                   | 0.316                                    |
|                      | OR    | 0.036                                                     | 1.370                        | 1.338                                 | 0.689             | 0.983                    | 1.065                     | 0.857                        | <b>1.050</b>                   | 1.000                                    |
|                      | p     | 0.006                                                     | 0.379                        | 0.109                                 | 0.277             | 0.903                    | 0.742                     | 0.555                        | <b>0.002</b>                   | 1.000                                    |
|                      | Model | X <sup>2</sup> (8)=16.817; p=0.032; R <sup>2</sup> =0.080 |                              |                                       |                   |                          |                           |                              |                                |                                          |

Note. <sup>a</sup> 1= Hospital (n=239); 0 = Other (n=175)

1  
2  
3  
4  
5  
6  
7  
8  
9  
10  
11  
12  
13  
14  
15  
16  
17  
18  
19  
20  
21  
22  
23  
24  
25  
26  
27  
28  
29  
30  
31  
32  
33  
34  
35  
36  
37  
38  
39  
40  
41  
42  
43  
44  
45  
46



1  
2  
3  
4  
5  
6  
7  
8  
9  
10  
11  
12  
13  
14  
15  
16  
17  
18  
19  
20  
21  
22  
23  
24  
25  
26  
27  
28  
29  
30  
31  
32  
33  
34  
35  
36  
37  
38  
39  
40  
41  
42  
43  
44  
45  
46  
47  
48  
49  
50  
51  
52  
53  
54  
55  
56  
57  
58  
59  
60

For peer review only

1  
2  
3  
4  
5  
6  
7  
8  
9  
10  
11  
12  
13  
14  
15  
16  
17  
18  
19  
20  
21  
22  
23  
24  
25  
26  
27  
28  
29  
30  
31  
32  
33  
34  
35  
36  
37  
38  
39  
40  
41  
42  
43  
44  
45  
46  
47  
48  
49  
50  
51  
52  
53  
54  
55  
56  
57  
58  
59  
60STROBE Statement—Checklist of items that should be included in reports of *cross-sectional studies*

|                              | <b>Item No</b> | <b>Recommendation</b>                                                                                                                                                                             | <b>Page number</b>                                     |
|------------------------------|----------------|---------------------------------------------------------------------------------------------------------------------------------------------------------------------------------------------------|--------------------------------------------------------|
| <b>Title and abstract</b>    | 1              | (a) Indicate the study's design with a commonly used term in the title or the abstract                                                                                                            | 1-3                                                    |
|                              |                | (b) Provide in the abstract an informative and balanced summary of what was done and what was found                                                                                               | 2-3                                                    |
| <b>Introduction</b>          |                |                                                                                                                                                                                                   |                                                        |
| Background/rationale         | 2              | Explain the scientific background and rationale for the investigation being reported                                                                                                              | 4-6                                                    |
| Objectives                   | 3              | State specific objectives, including any prespecified hypotheses                                                                                                                                  | 6-7                                                    |
| <b>Methods</b>               |                |                                                                                                                                                                                                   |                                                        |
| Study design                 | 4              | Present key elements of study design early in the paper                                                                                                                                           | 7                                                      |
| Setting                      | 5              | Describe the setting, locations, and relevant dates, including periods of recruitment, exposure, follow-up, and data collection                                                                   | 7                                                      |
| Participants                 | 6              | (a) Give the eligibility criteria, and the sources and methods of selection of participants                                                                                                       | 7                                                      |
| Variables                    | 7              | Clearly define all outcomes, exposures, predictors, potential confounders, and effect modifiers. Give diagnostic criteria, if applicable                                                          | 8-9                                                    |
| Data sources/<br>measurement | 8*             | For each variable of interest, give sources of data and details of methods of assessment (measurement). Describe comparability of assessment methods if there is more than one group              | 8-9                                                    |
| Bias                         | 9              | Describe any efforts to address potential sources of bias                                                                                                                                         | 7                                                      |
| Study size                   | 10             | Explain how the study size was arrived at                                                                                                                                                         | Not explained as was based on requirements for the RCT |
| Quantitative variables       | 11             | Explain how quantitative variables were handled in the analyses. If applicable, describe which groupings were chosen and why                                                                      | 9                                                      |
| Statistical methods          | 12             | (a) Describe all statistical methods, including those used to control for confounding                                                                                                             | 9                                                      |
|                              |                | (b) Describe any methods used to examine subgroups and interactions                                                                                                                               | -                                                      |
|                              |                | (c) Explain how missing data were addressed                                                                                                                                                       | -                                                      |
|                              |                | (d) If applicable, describe analytical methods taking account of sampling strategy                                                                                                                | -                                                      |
|                              |                | (e) Describe any sensitivity analyses                                                                                                                                                             | -                                                      |
| <b>Results</b>               |                |                                                                                                                                                                                                   |                                                        |
| Participants                 | 13*            | (a) Report numbers of individuals at each stage of study—eg numbers potentially eligible, examined for eligibility, confirmed eligible, included in the study, completing follow-up, and analysed | 9-10                                                   |
|                              |                | (b) Give reasons for non-participation at each stage                                                                                                                                              | -                                                      |
|                              |                | (c) Consider use of a flow diagram                                                                                                                                                                | -                                                      |
| Descriptive data             | 14*            | (a) Give characteristics of study participants (eg demographic,                                                                                                                                   | 9-10                                                   |

|                          |     |                                                                                                                                                                                                              |                |
|--------------------------|-----|--------------------------------------------------------------------------------------------------------------------------------------------------------------------------------------------------------------|----------------|
|                          |     | clinical, social) and information on exposures and potential confounders                                                                                                                                     |                |
|                          |     | (b) Indicate number of participants with missing data for each variable of interest                                                                                                                          | -              |
| Outcome data             | 15* | Report numbers of outcome events or summary measures                                                                                                                                                         | 10-13; Table 1 |
| Main results             | 16  | (a) Give unadjusted estimates and, if applicable, confounder-adjusted estimates and their precision (eg, 95% confidence interval). Make clear which confounders were adjusted for and why they were included | 10-13          |
|                          |     | (b) Report category boundaries when continuous variables were categorized                                                                                                                                    | 9; Table 1     |
|                          |     | (c) If relevant, consider translating estimates of relative risk into absolute risk for a meaningful time period                                                                                             | -              |
| Other analyses           | 17  | Report other analyses done—eg analyses of subgroups and interactions, and sensitivity analyses                                                                                                               | -              |
| <b>Discussion</b>        |     |                                                                                                                                                                                                              |                |
| Key results              | 18  | Summarise key results with reference to study objectives                                                                                                                                                     | 13-16          |
| Limitations              | 19  | Discuss limitations of the study, taking into account sources of potential bias or imprecision. Discuss both direction and magnitude of any potential bias                                                   | 16             |
| Interpretation           | 20  | Give a cautious overall interpretation of results considering objectives, limitations, multiplicity of analyses, results from similar studies, and other relevant evidence                                   | 13-16          |
| Generalisability         | 21  | Discuss the generalisability (external validity) of the study results                                                                                                                                        | 16             |
| <b>Other information</b> |     |                                                                                                                                                                                                              |                |
| Funding                  | 22  | Give the source of funding and the role of the funders for the present study and, if applicable, for the original study on which the present article is based                                                | 16             |

\*Give information separately for exposed and unexposed groups.

**Note:** An Explanation and Elaboration article discusses each checklist item and gives methodological background and published examples of transparent reporting. The STROBE checklist is best used in conjunction with this article (freely available on the Web sites of PLoS Medicine at <http://www.plosmedicine.org/>, Annals of Internal Medicine at <http://www.annals.org/>, and Epidemiology at <http://www.epidem.com/>). Information on the STROBE Initiative is available at [www.strobe-statement.org](http://www.strobe-statement.org).
